# Supplementary material for: In vitro expression and analysis of the 826 human G protein-coupled receptors
Source: PubMed Central journal article supplement (PMC4853319; doi:10.1007/s13238-016-0263-8), 2016-04-16
Supplement: 13238_2016_263_MOESM1_ESM.pdf [file 13238_2016_263_MOESM1_ESM.pdf]

Table S1. Comprehensive Protein Expression Data for 826 GPCRs

| Family          | Gene_names            | Protein_names                                          | Target name  | WT-aa-count | Nt_BRIL constructs |                 |              |               | ICL3_BRIL constructs |                 |              |               |
|-----------------|-----------------------|--------------------------------------------------------|--------------|-------------|--------------------|-----------------|--------------|---------------|----------------------|-----------------|--------------|---------------|
|                 |                       |                                                        |              |             | surface(%)         | surface density | total(%)     | total density | surface(%)           | surface density | total(%)     | total density |
| Rho-NonO        | HTR1A ADRB2RL         | 5-hydroxytryptamine receptor 1A                        | 5HT1A        | 422         | 53.85              | 50.98           | 96.15        | 288.23        | 80.65                | 64.56           | 96.30        | 504.39        |
| <b>Rho-NonO</b> | <b>HTR1B HTR1DB</b>   | <b>5-hydroxytryptamine receptor 1</b>                  | <b>5HT1B</b> | <b>390</b>  | <b>64.65</b>       | <b>64.60</b>    | <b>94.45</b> | <b>256.41</b> | <b>67.25</b>         | <b>29.44</b>    | <b>80.75</b> | <b>253.35</b> |
| Rho-NonO        | HTR1D HTR1DA          | 5-hydroxytryptamine receptor 1D                        | 5HT1D        | 377         | 54.05              | 41.95           | 93.75        | 242.30        | 72.55                | 38.74           | 79.90        | 273.22        |
| Rho-NonO        | HTR1E                 | 5-hydroxytryptamine receptor 1E                        | 5HT1E        | 365         | 64.20              | 49.92           | 96.95        | 319.57        | 74.95                | 51.43           | 95.15        | 408.59        |
| Rho-NonO        | HTR1F HTR1EL          | 5-hydroxytryptamine receptor 1F                        | 5HT1F        | 366         | 43.90              | 67.69           | 84.45        | 93.13         | 46.15                | 63.77           | 94.30        | 489.48        |
| Rho-NonO        | HTR2A HTR2            | 5-hydroxytryptamine receptor 2A                        | 5HT2A        | 471         | 74.85              | 65.35           | 96.75        | 493.59        | 68.55                | 36.80           | 92.90        | 433.54        |
| <b>Rho-NonO</b> | <b>HTR2B</b>          | <b>5-hydroxytryptamine receptor 2</b>                  | <b>5HT2B</b> | <b>481</b>  | <b>66.10</b>       | <b>46.45</b>    | <b>95.15</b> | <b>375.80</b> | <b>74.20</b>         | <b>41.40</b>    | <b>96.80</b> | <b>406.14</b> |
| Rho-NonO        | HTR2C HTR1C           | 5-hydroxytryptamine receptor 2C                        | 5HT2C        | 458         | 62.70              | 26.22           | 96.85        | 171.23        | 96.65                | 152.69          | 94.15        | 703.46        |
| Rho-NonO        | HTR4                  | 5-hydroxytryptamine receptor 4                         | 5HT4R        | 388         | 93.50              | 78.29           | 89.70        | 65.34         | 94.10                | 59.69           | 96.70        | 455.89        |
| Rho-NonO        | HTR5A                 | 5-hydroxytryptamine receptor 5A                        | 5HT5A        | 357         | 41.70              | 73.53           | 40.90        | 58.56         | 79.30                | 50.04           | 94.95        | 356.96        |
| Rho-NonO        | HTR6                  | 5-hydroxytryptamine receptor 6                         | 5HT6R        | 440         | 49.60              | 41.86           | 43.10        | 47.81         | 83.60                | 42.14           | 94.25        | 384.66        |
| Rho-NonO        | HTR7                  | 5-hydroxytryptamine receptor 7                         | 5HT7R        | 479         | 37.00              | 41.60           | 21.35        | 37.61         | 84.45                | 45.66           | 96.45        | 474.48        |
| Rho-NonO        | ADORA1                | Adenosine receptor A1                                  | AA1R         | 326         | 30.00              | 140.77          | 91.40        | 446.73        | 31.80                | 43.78           | 86.75        | 265.93        |
| <b>Rho-NonO</b> | <b>ADORA2A ADOA2A</b> | <b>Adenosine receptor A2a</b>                          | <b>AA2AR</b> | <b>412</b>  | <b>96.20</b>       | <b>184.82</b>   | <b>81.20</b> | <b>211.41</b> | <b>91.45</b>         | <b>142.46</b>   | <b>77.90</b> | <b>286.44</b> |
| Rho-NonO        | ADORA2B               | Adenosine receptor A2b                                 | AA2BR        | 332         | 31.70              | 115.30          | 41.15        | 483.40        | 23.80                | 30.81           | 79.15        | 110.84        |
| Rho-NonO        | ADORA3 UNQ19          | Adenosine receptor A3                                  | AA3R         | 318         | 37.95              | 109.19          | 92.15        | 411.35        | 61.45                | 55.75           | 82.75        | 303.75        |
| Rho-NonO        | CHRM1                 | Muscarinic acetylcholine receptor 1                    | ACM1         | 460         | 15.40              | 89.98           | 23.80        | 460.58        | 83.05                | 43.12           | 23.50        | 227.02        |
| <b>Rho-NonO</b> | <b>CHRM2</b>          | <b>Muscarinic acetylcholine receptor 2</b>             | <b>ACM2</b>  | <b>466</b>  | <b>62.05</b>       | <b>51.88</b>    | <b>90.90</b> | <b>539.14</b> | <b>72.95</b>         | <b>38.05</b>    | <b>75.60</b> | <b>268.31</b> |
| <b>Rho-NonO</b> | <b>CHRM3</b>          | <b>Muscarinic acetylcholine receptor 3</b>             | <b>ACM3</b>  | <b>590</b>  | <b>50.65</b>       | <b>56.72</b>    | <b>76.35</b> | <b>611.62</b> | <b>46.50</b>         | <b>45.90</b>    | <b>78.45</b> | <b>303.67</b> |
| Rho-NonO        | CHRM4                 | Muscarinic acetylcholine receptor 4                    | ACM4         | 479         | 34.05              | 47.62           | 87.50        | 534.25        | 34.70                | 95.04           | 79.80        | 352.52        |
| Rho-NonO        | CHRM5                 | Muscarinic acetylcholine receptor 5                    | ACM5         | 532         | 39.45              | 55.07           | 73.95        | 495.26        | 88.05                | 74.31           | 79.00        | 402.79        |
| Rho-NonO        | MC2R ACTHR            | Adrenocorticotrophic hormone receptor 2                | ACTHR        | 297         | 32.90              | 163.80          | 90.00        | 450.20        | 37.30                | 84.49           | 81.35        | 467.05        |
| Rho-NonO        | ADRA1A ADRA1          | Alpha-1A adrenergic receptor (A1)                      | ADA1A        | 466         | 71.60              | 52.31           | 97.25        | 404.13        | 83.75                | 43.50           | 94.70        | 462.76        |
| Rho-NonO        | ADRA1B                | Alpha-1B adrenergic receptor (A1)                      | ADA1B        | 520         | 21.95              | 56.96           | 12.85        | 59.27         | 57.85                | 40.12           | 94.25        | 481.30        |
| Rho-NonO        | ADRA1D ADRA1          | Alpha-1D adrenergic receptor (A1)                      | ADA1D        | 572         | 69.45              | 33.20           | 97.05        | 191.87        | 79.80                | 29.33           | 96.95        | 378.08        |
| Rho-NonO        | ADRA2A ADRA2          | Alpha-2A adrenergic receptor (A2)                      | ADA2A        | 450         | 35.45              | 37.21           | 95.50        | 455.67        | 66.85                | 68.74           | 90.25        | 474.20        |
| Rho-NonO        | ADRA2B ADRA2          | Alpha-2B adrenergic receptor (A2)                      | ADA2B        | 450         | 89.65              | 151.49          | 84.40        | 440.48        | 37.15                | 48.63           | 90.05        | 518.12        |
| Rho-NonO        | ADRA2C ADRA2          | Alpha-2C adrenergic receptor (A2)                      | ADA2C        | 462         | 24.55              | 54.51           | 91.45        | 488.87        | 45.85                | 54.87           | 92.60        | 536.48        |
| <b>Rho-NonO</b> | <b>ADRB1 ADRB1R</b>   | <b>Beta-1 adrenergic receptor (Beta-1)</b>             | <b>ADRB1</b> | <b>477</b>  | <b>79.35</b>       | <b>55.61</b>    | <b>97.95</b> | <b>465.69</b> | <b>93.30</b>         | <b>70.93</b>    | <b>94.90</b> | <b>299.99</b> |
| <b>Rho-NonO</b> | <b>ADRB2 ADRB2R</b>   | <b>Beta-2 adrenergic receptor (Beta-2)</b>             | <b>ADRB2</b> | <b>413</b>  | <b>42.50</b>       | <b>199.68</b>   | <b>97.45</b> | <b>480.55</b> | <b>71.10</b>         | <b>47.83</b>    | <b>95.35</b> | <b>380.84</b> |
| Rho-NonO        | ADRB3 ADRB3R          | Beta-3 adrenergic receptor (Beta-3)                    | ADRB3        | 408         | 40.20              | 54.57           | 56.60        | 58.21         | 80.60                | 50.44           | 94.50        | 515.67        |
| <b>Rho-NonO</b> | <b>AGTR1 AGTR1A</b>   | <b>Type-1 angiotensin II receptor (Type-1)</b>         | <b>AGTR1</b> | <b>359</b>  | <b>75.50</b>       | <b>67.27</b>    | <b>95.20</b> | <b>103.98</b> | <b>84.45</b>         | <b>51.22</b>    | <b>98.50</b> | <b>331.40</b> |
| Rho-NonO        | AGTR2                 | Type-2 angiotensin II receptor (Type-2)                | AGTR2        | 363         | 73.85              | 65.36           | 96.00        | 209.27        | 53.85                | 29.51           | 68.65        | 51.38         |
| Rho-NonO        | APLNR AGTRL1          | Apelin receptor (Angiotensin receptor-like receptor 1) | APJ          | 380         | 84.55              | 124.83          | 93.50        | 249.72        | 88.30                | 88.01           | 84.30        | 421.49        |
| Rho-NonO        | BDKRB1 BRADYKININ     | B1 bradykinin receptor (B1R) (BK1)                     | BKRB1        | 353         | 59.25              | 76.34           | 97.50        | 478.45        | 58.30                | 59.26           | 94.20        | 356.84        |
| Rho-NonO        | BDKRB2 BKR2           | B2 bradykinin receptor (B2R) (BK2)                     | BKRB2        | 391         | 33.55              | 75.40           | 41.05        | 67.31         | 43.00                | 52.25           | 88.70        | 195.53        |
| Rho-NonO        | BRS3                  | Bombesin receptor subtype-3 (BRS3)                     | BRS3         | 399         | 48.35              | 21.48           | 6.70         | 37.36         | 95.90                | 64.81           | 95.65        | 664.52        |
| Rho-NonO        | C3AR1 AZ3B C3AR       | C3a anaphylatoxin chemotactic receptor 1               | C3AR         | 482         | 51.65              | 68.09           | 58.45        | 68.19         | 16.05                | 45.66           | 88.40        | 176.82        |
| Rho-NonO        | C5AR1 C5AR C5AR       | C5a anaphylatoxin chemotactic receptor 1               | C5AR         | 350         | 49.45              | 204.92          | 86.15        | 173.86        | 82.05                | 76.25           | 94.15        | 423.94        |

Table S1. Comprehensive Protein Expression Data for 826 GPCRs

| Family   | Gene_names     | Protein_names                     | Target name | WT-aa-count | Nt_BRIL constructs |                 |          |               | ICL3_BRIL constructs |                 |          |               |
|----------|----------------|-----------------------------------|-------------|-------------|--------------------|-----------------|----------|---------------|----------------------|-----------------|----------|---------------|
|          |                |                                   |             |             | surface(%)         | surface density | total(%) | total density | surface(%)           | surface density | total(%) | total density |
| Rho-NonO | GPR77 C5L2     | C5a anaphylatoxin chemotactic r   | C5ARL       | 337         | 50.80              | 41.87           | 59.70    | 48.54         | 43.05                | 106.14          | 79.50    | 131.22        |
| Rho-NonO | CCBP2 CCR10 C  | Chemokine-binding protein 2 (C-   | CCBP2       | 384         | 52.10              | 27.03           | 79.60    | 59.44         | 37.00                | 32.97           | 90.55    | 199.36        |
| Rho-NonO | CCKAR CCKRA    | Cholecystokinin receptor type A   | CCKAR       | 428         | 47.20              | 30.61           | 54.40    | 39.31         | 64.65                | 44.63           | 93.25    | 669.55        |
| Rho-NonO | CCR1 CMKBR1 C  | C-C chemokine receptor type 1 (   | CCR1        | 355         | 49.95              | 152.79          | 96.15    | 948.77        | 36.30                | 62.03           | 91.75    | 661.19        |
| Rho-NonO | CCR10 GPR2     | C-C chemokine receptor type 10    | CCR10       | 362         | 39.75              | 94.89           | 91.75    | 497.43        | 66.60                | 143.68          | 92.35    | 1,457.21      |
| Rho-NonO | CCR2 CMKBR2    | C-C chemokine receptor type 2 (   | CCR2        | 374         | 57.50              | 98.02           | 92.90    | 183.37        | 29.30                | 55.70           | 92.40    | 523.45        |
| Rho-NonO | CCR3 CMKBR3    | C-C chemokine receptor type 3 (   | CCR3        | 355         | 36.25              | 99.01           | 91.65    | 423.88        | 31.85                | 56.55           | 91.95    | 378.11        |
| Rho-NonO | CCR4 CMKBR4    | C-C chemokine receptor type 4 (   | CCR4        | 360         | 38.55              | 73.60           | 78.40    | 178.57        | 25.90                | 57.37           | 83.45    | 269.39        |
| Rho-NonO | CCR5 CMKBR5    | C-C chemokine receptor type 5 (   | CCR5        | 352         | 53.80              | 39.57           | 87.10    | 206.88        | 54.80                | 42.41           | 90.60    | 719.78        |
| Rho-NonO | CCR6 CKRL3 CM  | C-C chemokine receptor type 6 (   | CCR6        | 374         | 50.65              | 58.37           | 96.95    | 266.20        | 35.25                | 66.08           | 90.10    | 338.70        |
| Rho-NonO | CCR7 CMKBR7 E  | C-C chemokine receptor type 7 (   | CCR7        | 378         | 59.45              | 131.40          | 95.30    | 358.20        | 80.15                | 72.53           | 85.70    | 577.91        |
| Rho-NonO | CCR8 CKRL1 CM  | C-C chemokine receptor type 8 (   | CCR8        | 355         | 62.80              | 68.07           | 88.15    | 163.24        | 68.65                | 32.26           | 63.50    | 166.59        |
| Rho-NonO | CCR9 GPR28     | C-C chemokine receptor type 9 (   | CCR9        | 369         | 29.70              | 165.30          | 86.95    | 383.35        | 60.80                | 45.84           | 73.30    | 419.05        |
| Rho-NonO | CCRL1 CCBP2 CC | C-C chemokine receptor type 11    | CCRL1       | 350         | 65.50              | 30.10           | 98.75    | 428.67        | 75.20                | 20.36           | 95.05    | 280.37        |
| Rho-NonO | CCRL2 CCR11 CC | C-C chemokine receptor-like 2 (C  | CCRL2       | 344         | 64.15              | 66.81           | 98.20    | 678.50        | 67.95                | 39.97           | 95.75    | 420.05        |
| Rho-NonO | CYSLTR1 CYSLT1 | Cysteiny leukotriene receptor 1   | CLTR1       | 337         | 58.50              | 80.71           | 97.50    | 531.50        | 38.10                | 54.89           | 90.30    | 446.04        |
| Rho-NonO | CYSLTR2 CYSLT2 | Cysteiny leukotriene receptor 2   | CLTR2       | 346         | 42.30              | 35.94           | 65.25    | 45.82         | 76.65                | 28.05           | 92.10    | 224.49        |
| Rho-NonO | CMKLR1 CHEMR   | Chemokine-like receptor 1 (G-pro  | CML1        | 373         | 82.80              | 50.80           | 93.25    | 88.44         | 37.35                | 32.94           | 45.35    | 34.94         |
| Rho-NonO | CNR1 CNR       | Cannabinoid receptor 1 (CB-R) (C  | CNR1        | 472         | 20.00              | 73.39           | 53.05    | 242.89        | 63.15                | 46.63           | 87.60    | 240.68        |
| Rho-NonO | CNR2           | Cannabinoid receptor 2 (CB-2) (C  | CNR2        | 360         | 47.15              | 57.47           | 88.45    | 230.52        | 45.85                | 39.53           | 78.05    | 237.97        |
| Rho-NonO | CX3CR1 CMKBR1  | CX3C chemokine receptor 1 (C-X-   | CX3C1       | 355         | 45.70              | 38.40           | 76.30    | 75.44         | 44.25                | 43.72           | 94.50    | 258.51        |
| Rho-NonO | CXCR1 CMKAR1   | C-X-C chemokine receptor type 1   | CXCR1       | 350         | 53.75              | 32.20           | 74.20    | 51.06         | 82.10                | 36.07           | 94.85    | 311.31        |
| Rho-NonO | CXCR2 IL8RB    | C-X-C chemokine receptor type 2   | CXCR2       | 360         | 63.10              | 50.45           | 96.65    | 575.27        | 82.50                | 39.81           | 94.70    | 367.79        |
| Rho-NonO | CXCR3 GPR9     | C-X-C chemokine receptor type 3   | CXCR3       | 368         | 39.85              | 58.11           | 89.45    | 101.61        | 75.60                | 50.20           | 95.65    | 426.26        |
| Rho-NonO | CXCR4          | C-X-C chemokine receptor type 4   | CXCR4       | 352         | 50.55              | 52.06           | 79.20    | 86.18         | 44.35                | 151.25          | 95.75    | 639.41        |
| Rho-NonO | CXCR5 BLR1 MD  | C-X-C chemokine receptor type 5   | CXCR5       | 372         | 43.00              | 30.28           | 67.80    | 50.86         | 48.30                | 82.98           | 96.30    | 623.18        |
| Rho-NonO | CXCR6 BONZO S  | C-X-C chemokine receptor type 6   | CXCR6       | 342         | 50.75              | 26.02           | 61.00    | 44.82         | 52.05                | 144.11          | 88.35    | 562.63        |
| Rho-NonO | CXCR7 CMKOR1   | C-X-C chemokine receptor type 7   | CXCR7       | 362         | 45.80              | 27.72           | 61.15    | 52.46         | 38.50                | 38.99           | 90.65    | 279.88        |
| Rho-NonO | DRD1           | D(1A) dopamine receptor (Dopa     | DRD1        | 446         | 41.70              | 75.19           | 71.45    | 265.64        | 37.95                | 44.02           | 83.55    | 376.90        |
| Rho-NonO | DRD2           | D(2) dopamine receptor (Dopam     | DRD2        | 443         | 31.60              | 40.77           | 68.50    | 203.86        | 75.05                | 66.53           | 69.60    | 345.61        |
| Rho-NonO | DRD3           | D(3) dopamine receptor (Dopam     | DRD3        | 400         | 66.70              | 49.86           | 83.65    | 311.63        | 63.50                | 48.89           | 72.45    | 254.33        |
| Rho-NonO | DRD4           | D(4) dopamine receptor (D(2C) d   | DRD4        | 467         | 76.10              | 86.21           | 80.95    | 378.23        | 79.60                | 187.29          | 81.65    | 405.73        |
| Rho-NonO | DRD5 DRD1B DR  | D(1B) dopamine receptor (D(5) d   | DRD5        | 477         | 15.50              | 175.16          | 52.90    | 216.06        | 19.95                | 74.24           | 79.70    | 367.41        |
| Rho-NonO | DARC FY GPD    | Duffy antigen/chemokine recept    | DUFFY       | 336         | 68.50              | 70.52           | 96.90    | 338.30        | 92.25                | 259.14          | 86.55    | 1,051.32      |
| Rho-NonO | EDNRA ETA ETR  | Endothelin-1 receptor (Endotheli  | EDNRA       | 427         | 82.50              | 143.31          | 97.90    | 487.91        | 56.35                | 63.07           | 73.60    | 88.60         |
| Rho-NonO | EDNRB ETRB     | Endothelin B receptor (ET-B) (ET- | EDNRB       | 442         | 71.75              | 30.67           | 78.30    | 54.86         | 96.00                | 200.37          | 93.65    | 602.24        |
| Rho-NonO | GPR37L1 ETBRL  | Endothelin B receptor-like protei | ETBR2       | 481         | 92.90              | 68.07           | 59.70    | 53.97         | 76.30                | 32.98           | 96.10    | 104.00        |
| Rho-NonO | FFAR1 GPR40    | Free fatty acid receptor 1 (G-pro | FFAR1       | 300         | 68.65              | 175.22          | 97.55    | 1,034.22      | 27.20                | 202.63          | 40.55    | 98.88         |
| Rho-NonO | FFAR2 GPR43    | Free fatty acid receptor 2 (G-pro | FFAR2       | 330         | 52.10              | 55.18           | 68.00    | 75.53         | 26.00                | 27.23           | 20.80    | 25.58         |
| Rho-NonO | FFAR3 GPR41    | Free fatty acid receptor 3 (G-pro | FFAR3       | 346         | 71.70              | 215.18          | 96.35    | 246.62        | 20.80                | 47.08           | 34.85    | 34.01         |

Table S1. Comprehensive Protein Expression Data for 826 GPCRs

| Family   | Gene_names      | Protein_names                                               | Target name | WT-aa-count | Nt_BRIL constructs |                 |          |               | ICL3_BRIL constructs |                 |          |               |
|----------|-----------------|-------------------------------------------------------------|-------------|-------------|--------------------|-----------------|----------|---------------|----------------------|-----------------|----------|---------------|
|          |                 |                                                             |             |             | surface(%)         | surface density | total(%) | total density | surface(%)           | surface density | total(%) | total density |
| Rho-NonO | FFAR4 GPR120    | Free fatty acid receptor 4 (G-protein coupled receptor 120) | FFAR4       | 377         | 52.90              | 120.67          | 94.00    | 237.25        | 25.40                | 36.72           | 36.80    | 34.90         |
| Rho-NonO | FPR1            | fMet-Leu-Phe receptor (fMLP receptor)                       | FPR1        | 350         | 65.40              | 86.28           | 92.35    | 172.46        | 72.65                | 46.84           | 97.95    | 263.59        |
| Rho-NonO | FPR2 FPRH1 FPRN | N-formyl peptide receptor 2 (FMRFPR2)                       | FPR2        | 351         | 65.95              | 76.60           | 94.40    | 111.69        | 47.60                | 37.96           | 75.70    | 60.65         |
| Rho-NonO | FPR3 FPRH1 FPRN | N-formyl peptide receptor 3 (FMRFPR3)                       | FPR3        | 353         | 40.25              | 75.14           | 74.80    | 89.82         | 63.25                | 44.58           | 91.90    | 387.28        |
| Rho-NonO | FSHR LGR1       | Follicle-stimulating hormone receptor                       | FSHR        | 695         | 33.85              | 63.67           | 91.65    | 287.42        | 13.60                | 104.37          | 21.90    | 50.08         |
| Rho-NonO | GALR1 GALNR1    | Galanin receptor type 1 (GAL1-R)                            | GALR1       | 349         | 53.25              | 29.72           | 71.60    | 52.67         | 70.40                | 42.27           | 92.85    | 460.29        |
| Rho-NonO | GALR2 GALNR2    | Galanin receptor type 2 (GAL2-R)                            | GALR2       | 387         | 57.45              | 23.61           | 73.55    | 59.39         | 80.80                | 30.56           | 97.20    | 233.94        |
| Rho-NonO | GALR3 GALNR3    | Galanin receptor type 3 (GAL3-R)                            | GALR3       | 368         | 49.90              | 34.45           | 56.40    | 42.90         | 78.50                | 38.57           | 95.95    | 245.76        |
| Rho-NonO | CCKBR CCKRB     | Gastrin/cholecystokinin type B receptor                     | GASR        | 447         | 70.65              | 72.48           | 94.45    | 114.33        | 65.45                | 53.77           | 80.10    | 85.06         |
| Rho-NonO | GHSR            | Growth hormone secretagogue receptor                        | GHSR        | 366         | 43.90              | 113.14          | 96.90    | 616.74        | 68.45                | 33.92           | 92.75    | 189.21        |
| Rho-NonO | GNRHR GRHR      | Gonadotropin-releasing hormone receptor                     | GNRHR       | 328         | 32.65              | 54.20           | 35.90    | 51.82         | 53.65                | 66.68           | 86.05    | 312.53        |
| Rho-NonO | GNRHR2          | Putative gonadotropin-releasing hormone receptor            | GNRR2       | 292         | 1.85               | 26.50           | 20.60    | 29.47         | 50.10                | 97.92           | 93.25    | 1,039.43      |
| Rho-NonO | GPR101          | Probable G-protein coupled receptor                         | GP101       | 508         | 83.05              | 84.24           | 87.20    | 88.21         | 37.75                | 61.95           | 61.75    | 55.42         |
| Rho-NonO | GPR119          | Glucose-dependent insulinotropic polypeptide receptor       | GP119       | 335         | 37.20              | 65.82           | 69.35    | 538.83        | 48.50                | 26.55           | 54.90    | 112.80        |
| Rho-NonO | GPR132 G2A      | Probable G-protein coupled receptor                         | GP132       | 380         | 17.95              | 84.19           | 46.35    | 93.07         | 19.85                | 47.91           | 92.95    | 130.14        |
| Rho-NonO | GPR135          | Probable G-protein coupled receptor                         | GP135       | 494         | 65.80              | 77.97           | 94.70    | 284.17        | 83.30                | 284.71          | 93.35    | 1,084.53      |
| Rho-NonO | GPR139 GPRG1    | Probable G-protein coupled receptor                         | GP139       | 353         | 31.20              | 48.06           | 44.05    | 48.11         | 18.35                | 23.87           | 64.05    | 89.41         |
| Rho-NonO | GPR141 PGR13    | Probable G-protein coupled receptor                         | GP141       | 305         | 52.70              | 47.59           | 83.00    | 79.58         | 56.75                | 63.20           | 95.75    | 633.83        |
| Rho-NonO | GPR142 PGR2     | Probable G-protein coupled receptor                         | GP142       | 462         | 45.15              | 47.33           | 97.10    | 198.29        | 63.20                | 73.94           | 71.25    | 56.21         |
| Rho-NonO | GPR143 OA1      | G-protein coupled receptor 143                              | GP143       | 404         | 48.75              | 135.76          | 85.15    | 166.42        | 50.20                | 272.68          | 93.65    | 578.86        |
| Rho-NonO | GPR146 PGR8     | Probable G-protein coupled receptor                         | GP146       | 333         | 46.25              | 201.66          | 52.65    | 130.15        | 38.15                | 67.63           | 89.60    | 313.37        |
| Rho-NonO | GPR148 BTR PG1  | Probable G-protein coupled receptor                         | GP148       | 347         | 45.60              | 89.45           | 49.00    | 84.96         | 43.55                | 58.51           | 95.60    | 394.09        |
| Rho-NonO | GPR149 PGR10    | Probable G-protein coupled receptor                         | GP149       | 731         | 37.95              | 124.36          | 94.65    | 384.70        | 72.80                | 65.34           | 95.20    | 843.96        |
| Rho-NonO | GPR150          | Probable G-protein coupled receptor                         | GP150       | 434         | 44.35              | 90.98           | 96.10    | 380.82        | 59.15                | 68.61           | 93.45    | 279.06        |
| Rho-NonO | GPR151 PGR7     | Probable G-protein coupled receptor                         | GP151       | 419         | 58.10              | 44.65           | 89.85    | 113.53        | 49.50                | 46.66           | 81.20    | 97.60         |
| Rho-NonO | GPR152 PGR5     | Probable G-protein coupled receptor                         | GP152       | 470         | 51.00              | 191.76          | 61.60    | 137.07        | 52.25                | 41.82           | 85.55    | 103.82        |
| Rho-NonO | GPR153 PGR1     | Probable G-protein coupled receptor                         | GP153       | 609         | 56.80              | 84.62           | 88.30    | 212.56        | 85.80                | 38.57           | 86.65    | 231.40        |
| Rho-NonO | GPR160 GPCR15   | Probable G-protein coupled receptor                         | GP160       | 338         | 41.60              | 156.26          | 46.20    | 83.99         | 61.45                | 47.64           | 93.05    | 510.41        |
| Rho-NonO | GPR161          | G-protein coupled receptor 161                              | GP161       | 529         | 79.40              | 77.67           | 96.65    | 312.19        | 55.10                | 57.38           | 94.85    | 304.97        |
| Rho-NonO | GPR162 GRCA     | Probable G-protein coupled receptor                         | GP162       | 588         | 46.80              | 48.14           | 86.95    | 164.01        | 81.20                | 37.48           | 91.20    | 749.73        |
| Rho-NonO | GPR171 H963     | Probable G-protein coupled receptor                         | GP171       | 319         | 44.35              | 115.96          | 67.50    | 123.89        | 45.45                | 46.29           | 95.25    | 536.53        |
| Rho-NonO | GPR173 SREB3    | Probable G-protein coupled receptor                         | GP173       | 373         | 55.45              | 64.88           | 44.90    | 39.00         | 81.95                | 38.60           | 93.75    | 283.42        |
| Rho-NonO | GPR174 FKSG79   | Probable G-protein coupled receptor                         | GP174       | 333         | 42.80              | 110.95          | 79.25    | 121.37        | 53.40                | 55.34           | 93.95    | 241.15        |
| Rho-NonO | GPR176          | Probable G-protein coupled receptor                         | GP176       | 515         | 28.25              | 85.06           | 82.20    | 536.56        | 33.79                | 38.04           | 10.07    | 72.26         |
| Rho-NonO | GPR182 ADMR     | G-protein coupled receptor 182                              | GP182       | 404         | 57.80              | 132.08          | 98.15    | 611.55        | 42.15                | 47.08           | 87.55    | 183.79        |
| Rho-NonO | GPR183 EB12     | G-protein coupled receptor 183                              | GP183       | 361         | 46.80              | 32.72           | 52.95    | 35.12         | 42.40                | 48.18           | 93.55    | 351.97        |
| Rho-NonO | GPBAR1 TGR5     | G-protein coupled bile acid receptor                        | GPBAR       | 330         | 57.75              | 84.57           | 91.30    | 290.50        | 88.15                | 74.76           | 83.75    | 321.23        |
| Rho-NonO |                 | Putative G-protein coupled receptor                         | GPC39       | 272         | 81.55              | 84.91           | 97.75    | 536.43        | 53.55                | 58.69           | 77.10    | 85.46         |
| Rho-NonO | GPER CEPR CMK   | G-protein coupled estrogen receptor                         | GPER        | 375         | 41.25              | 36.62           | 56.50    | 47.87         | 46.70                | 126.32          | 97.10    | 601.99        |
| Rho-NonO | GPR1            | G-protein coupled receptor 1                                | GPR1        | 355         | 21.60              | 93.71           | 63.25    | 240.47        | 52.75                | 41.51           | 73.05    | 73.39         |

Table S1. Comprehensive Protein Expression Data for 826 GPCRs

| Family   | Gene_names    | Protein_names                       | Target name | WT-aa-count | Nt_BRIL constructs |                 |          |               | ICL3_BRIL constructs |                 |          |               |
|----------|---------------|-------------------------------------|-------------|-------------|--------------------|-----------------|----------|---------------|----------------------|-----------------|----------|---------------|
|          |               |                                     |             |             | surface(%)         | surface density | total(%) | total density | surface(%)           | surface density | total(%) | total density |
| Rho-NonO | GPR12         | G-protein coupled receptor 12       | GPR12       | 334         | 45.40              | 26.87           | 56.95    | 35.00         | 22.45                | 181.06          | 61.55    | 432.79        |
| Rho-NonO | GPR15         | G-protein coupled receptor 15 (E    | GPR15       | 360         | 70.90              | 70.26           | 86.35    | 80.80         | 70.85                | 59.38           | 95.10    | 434.11        |
| Rho-NonO | GPR17         | Uracil nucleotide/cysteiny l leuko  | GPR17       | 367         | 50.95              | 41.65           | 82.90    | 71.86         | 60.50                | 45.84           | 68.95    | 53.87         |
| Rho-NonO | GPR18 GPCRW   | N-arachidonyl glycine receptor (N   | GPR18       | 331         | 67.85              | 67.07           | 96.70    | 495.52        | 67.05                | 32.28           | 95.65    | 445.66        |
| Rho-NonO | GPR19         | Probable G-protein coupled receptor | GPR19       | 415         | 70.65              | 78.25           | 93.60    | 97.69         | 46.10                | 49.72           | 95.80    | 377.15        |
| Rho-NonO | GPR20         | G-protein coupled receptor 20       | GPR20       | 358         | 46.95              | 43.48           | 71.45    | 54.59         | 49.70                | 54.43           | 96.00    | 550.54        |
| Rho-NonO | GPR21         | Probable G-protein coupled rece     | GPR21       | 349         | 63.40              | 89.69           | 81.80    | 441.82        | 34.25                | 23.91           | 57.40    | 48.31         |
| Rho-NonO | GPR22         | Probable G-protein coupled rece     | GPR22       | 433         | 61.20              | 30.06           | 57.45    | 35.13         | 75.15                | 31.83           | 87.30    | 241.44        |
| Rho-NonO | GPR25         | Probable G-protein coupled rece     | GPR25       | 361         | 31.85              | 81.30           | 56.70    | 94.02         | 53.85                | 42.73           | 93.55    | 489.07        |
| Rho-NonO | GPR26         | G-protein coupled receptor 26       | GPR26       | 337         | 83.65              | 85.55           | 97.70    | 414.86        | 46.05                | 50.44           | 51.05    | 63.55         |
| Rho-NonO | GPR27 SREB1   | Probable G-protein coupled rece     | GPR27       | 375         | 66.05              | 39.78           | 95.15    | 244.86        | 71.15                | 33.82           | 96.45    | 167.40        |
| Rho-NonO | GPR3 ACCA     | G-protein coupled receptor 3 (AC    | GPR3        | 330         | 78.30              | 122.75          | 97.90    | 700.87        | 8.05                 | 71.91           | 3.05     | 33.61         |
| Rho-NonO | GPR31         | 12-(S)-hydroxy-5,8,10,14-eicosat    | GPR31       | 319         | 68.90              | 57.98           | 92.45    | 72.12         | 52.45                | 111.26          | 98.45    | 439.11        |
| Rho-NonO | GPR32         | Probable G-protein coupled rece     | GPR32       | 356         | 89.55              | 59.69           | 94.85    | 117.80        | 30.75                | 38.28           | 55.35    | 56.59         |
| Rho-NonO | GPR33         | Probable G-protein coupled rece     | GPR33       | 333         | 76.90              | 38.22           | 97.85    | 274.40        | 69.40                | 129.90          | 83.15    | 176.40        |
| Rho-NonO | GPR34         | Probable G-protein coupled rece     | GPR34       | 381         | 39.35              | 83.31           | 54.80    | 96.08         | 68.65                | 33.10           | 94.55    | 560.54        |
| Rho-NonO | GPR35         | G-protein coupled receptor 35 (K    | GPR35       | 309         | 55.50              | 41.41           | 78.15    | 400.54        | 51.60                | 52.43           | 93.85    | 501.27        |
| Rho-NonO | GPR37         | Probable G-protein coupled rece     | GPR37       | 613         | 66.45              | 112.63          | 98.10    | 909.40        | 31.75                | 19.87           | 75.95    | 152.88        |
| Rho-NonO | GPR39         | G-protein coupled receptor 39       | GPR39       | 453         | 68.15              | 93.87           | 73.85    | 283.96        | 57.65                | 45.66           | 92.80    | 513.02        |
| Rho-NonO | GPR4 GPR19    | G-protein coupled receptor 4 (G-    | GPR4        | 362         | 47.85              | 184.14          | 96.85    | 642.40        | 29.70                | 43.97           | 91.85    | 249.51        |
| Rho-NonO | GPR42 GPR42P  | G-protein coupled receptor 42       | GPR42       | 346         | 33.75              | 108.75          | 61.10    | 137.01        | 30.85                | 46.76           | 88.90    | 311.73        |
| Rho-NonO | GPR45         | Probable G-protein coupled rece     | GPR45       | 372         | 23.80              | 60.69           | 60.70    | 85.77         | 30.45                | 32.76           | 90.45    | 160.66        |
| Rho-NonO | GPR52         | Probable G-protein coupled rece     | GPR52       | 361         | 78.65              | 95.46           | 98.00    | 526.15        | 46.95                | 50.75           | 97.95    | 215.58        |
| Rho-NonO | GPR55         | G-protein coupled receptor 55       | GPR55       | 319         | 43.55              | 116.97          | 97.70    | 831.15        | 38.65                | 33.57           | 94.25    | 424.46        |
| Rho-NonO | GPR6          | G-protein coupled receptor 6 (Sp    | GPR6        | 362         | 17.49              | 97.84           | 59.85    | 125.31        | 43.80                | 179.85          | 82.05    | 813.91        |
| Rho-NonO | GPR61 BALGR   | Probable G-protein coupled rece     | GPR61       | 451         | 15.85              | 47.26           | 25.25    | 45.17         | 50.60                | 30.53           | 92.70    | 256.64        |
| Rho-NonO | GPR62         | Probable G-protein coupled rece     | GPR62       | 368         | 61.55              | 40.14           | 96.80    | 403.00        | 49.10                | 126.65          | 94.95    | 974.51        |
| Rho-NonO | GPR63 PSP24B  | Probable G-protein coupled rece     | GPR63       | 419         | 67.50              | 58.04           | 93.15    | 460.95        | 59.15                | 33.00           | 92.80    | 216.27        |
| Rho-NonO | GPR75         | Probable G-protein coupled rece     | GPR75       | 540         | 19.20              | 85.92           | 21.35    | 53.69         | 60.65                | 38.11           | 95.05    | 395.18        |
| Rho-NonO | GPR78 UNQ592  | G-protein coupled receptor 78       | GPR78       | 363         | 53.00              | 67.20           | 58.55    | 44.94         | 53.95                | 14.54           | 38.30    | 26.94         |
| Rho-NonO | GPR82         | Probable G-protein coupled rece     | GPR82       | 336         | 82.75              | 91.45           | 96.60    | 382.24        | 26.90                | 51.58           | 52.20    | 83.33         |
| Rho-NonO | GPR83 GPR72 K | Probable G-protein coupled rece     | GPR83       | 423         | 58.90              | 31.72           | 77.10    | 38.94         | 83.05                | 36.32           | 95.25    | 221.01        |
| Rho-NonO | GPR84 EX33    | G-protein coupled receptor 84 (H    | GPR84       | 396         | 53.00              | 63.67           | 61.45    | 52.67         | 51.55                | 44.87           | 51.85    | 39.75         |
| Rho-NonO | GPR85 SREB2   | Probable G-protein coupled rece     | GPR85       | 370         | 90.20              | 65.28           | 97.65    | 529.95        | 75.70                | 46.62           | 84.55    | 289.26        |
| Rho-NonO | GPR87 GPR95 F | G-protein coupled receptor 87 (C    | GPR87       | 358         | 62.00              | 20.31           | 62.55    | 38.09         | 86.20                | 29.20           | 94.70    | 549.53        |
| Rho-NonO | GPR88 STRG    | Probable G-protein coupled rece     | GPR88       | 384         | 66.25              | 53.39           | 96.10    | 700.64        | 75.40                | 145.85          | 91.50    | 583.08        |
| Rho-NonO | GRPR          | Gastrin-releasing peptide recept    | GRPR        | 384         | 45.85              | 87.18           | 51.30    | 78.03         | 75.40                | 97.10           | 95.00    | 440.07        |
| Rho-NonO | HCAR1 GPR104  | Hydroxycarboxylic acid receptor     | HCAR1       | 346         | 43.75              | 97.67           | 83.70    | 83.70         | 24.20                | 61.55           | 89.35    | 370.94        |
| Rho-NonO | HCAR2 GPR109  | Hydroxycarboxylic acid receptor     | HCAR2       | 363         | 57.50              | 72.64           | 78.25    | 78.25         | 57.25                | 59.26           | 94.50    | 371.98        |
| Rho-NonO | HCAR3 GPR109E | Hydroxycarboxylic acid receptor     | HCAR3       | 387         | 41.15              | 57.43           | 67.80    | 67.80         | 63.65                | 84.79           | 95.85    | 587.19        |

Table S1. Comprehensive Protein Expression Data for 826 GPCRs

| Family   | Gene_names         | Protein_names                                                   | Target name | WT-aa-count | Nt_BRIL constructs |                 |          |               | ICL3_BRIL constructs |                 |          |               |
|----------|--------------------|-----------------------------------------------------------------|-------------|-------------|--------------------|-----------------|----------|---------------|----------------------|-----------------|----------|---------------|
|          |                    |                                                                 |             |             | surface(%)         | surface density | total(%) | total density | surface(%)           | surface density | total(%) | total density |
| Rho-NonO | HRH1               | Histamine H1 receptor (H1R) (HRH1)                              | HRH1        | 487         | 43.00              | 20.11           | 73.60    | 56.82         | 82.00                | 33.82           | 95.05    | 399.93        |
| Rho-NonO | HRH2               | Histamine H2 receptor (H2R) (HRH2)                              | HRH2        | 359         | 49.60              | 32.51           | 72.75    | 60.00         | 39.40                | 67.02           | 94.90    | 597.47        |
| Rho-NonO | HRH3 GPCR97        | Histamine H3 receptor (H3R) (HRH3)                              | HRH3        | 445         | 61.10              | 61.01           | 95.75    | 381.19        | 54.55                | 61.73           | 90.00    | 292.55        |
| Rho-NonO | HRH4 GPCR105       | Histamine H4 receptor (H4R) (HRH4)                              | HRH4        | 390         | 42.35              | 84.17           | 80.05    | 80.05         | 84.30                | 48.45           | 90.75    | 257.30        |
| Rho-NonO | KISS1R AXOR12      | KiSS-1 receptor (KiSS-1R) (G-prot)                              | KISSR       | 398         | 42.75              | 46.33           | 84.75    | 64.22         | 56.15                | 57.70           | 94.45    | 458.35        |
| Rho-NonO | LGR4 GPR48         | Leucine-rich repeat-containing G                                | LGR4        | 951         | 93.70              | 234.89          | 85.20    | 434.50        | 37.05                | 55.40           | 83.25    | 733.21        |
| Rho-NonO | LGR5 GPR49 GPR49   | Leucine-rich repeat-containing G                                | LGR5        | 907         | 50.95              | 115.34          | 91.10    | 251.50        | 33.05                | 66.82           | 73.95    | 487.35        |
| Rho-NonO | LGR6 UNQ6427       | Leucine-rich repeat-containing G                                | LGR6        | 967         | 79.90              | 142.22          | 58.20    | 463.09        | 31.65                | 31.97           | 73.10    | 337.13        |
| Rho-NonO | LPAR1 EDG2 LPAR1   | Lysophosphatidic acid receptor 1 (LPAR1)                        | LPAR1       | 364         | 9.40               | 18.51           | 15.02    | 18.82         | 87.05                | 57.72           | 84.10    | 284.37        |
| Rho-NonO | LPAR2 EDG4 LPAR2   | Lysophosphatidic acid receptor 2 (LPAR2)                        | LPAR2       | 351         | 40.75              | 133.75          | 93.35    | 521.12        | 37.50                | 44.62           | 98.20    | 1,194.63      |
| Rho-NonO | LPAR3 EDG7 LPAR3   | Lysophosphatidic acid receptor 3 (LPAR3)                        | LPAR3       | 353         | 53.85              | 30.05           | 87.50    | 271.47        | 63.00                | 37.70           | 93.15    | 396.08        |
| Rho-NonO | LPAR4 GPR23 LPAR4  | Lysophosphatidic acid receptor 4 (LPAR4)                        | LPAR4       | 370         | 36.05              | 67.86           | 69.85    | 87.02         | 40.55                | 60.18           | 95.25    | 778.37        |
| Rho-NonO | LPAR5 GPR92 LPAR5  | Lysophosphatidic acid receptor 5 (LPAR5)                        | LPAR5       | 372         | 46.20              | 51.83           | 76.70    | 81.46         | 53.10                | 72.23           | 95.70    | 461.89        |
| Rho-NonO | LPAR6 P2RY5 LPAR6  | Lysophosphatidic acid receptor 6 (LPAR6)                        | LPAR6       | 344         | 35.05              | 45.03           | 68.65    | 73.90         | 32.40                | 26.99           | 92.70    | 295.76        |
| Rho-NonO | LHCGR LCGR LHCGR   | Lutropin-choriogonadotropic hormone receptor (LHCGR)            | LSHR        | 699         | 12.30              | 60.71           | 20.70    | 55.89         | 44.95                | 61.93           | 82.70    | 88.82         |
| Rho-NonO | LTB4R BLT BLT1     | Leukotriene B4 receptor 1 (LTB4R1)                              | LT4R1       | 352         | 68.00              | 38.78           | 84.90    | 47.52         | 63.95                | 26.82           | 80.10    | 61.01         |
| Rho-NonO | LTB4R2 BLT2R BLT2  | Leukotriene B4 receptor 2 (LTB4R2)                              | LT4R2       | 389         | 77.35              | 123.30          | 97.00    | 555.21        | 62.40                | 79.06           | 76.10    | 106.05        |
| Rho-NonO | MAS1 MAS           | Proto-oncogene Mas                                              | MAS         | 325         | 46.65              | 103.46          | 92.65    | 394.28        | 68.70                | 37.96           | 94.90    | 277.41        |
| Rho-NonO | MAS1L MRG          | Mas-related G-protein coupled receptor (MRG)                    | MAS1L       | 378         | 37.20              | 57.35           | 41.00    | 45.77         | 57.15                | 62.82           | 93.30    | 327.09        |
| Rho-NonO | MC3R               | Melanocortin receptor 3 (MC3-R)                                 | MC3R        | 323         | 18.00              | 30.54           | 74.15    | 267.94        | 9.55                 | 44.62           | 29.00    | 51.60         |
| Rho-NonO | MC4R               | Melanocortin receptor 4 (MC4-R)                                 | MC4R        | 332         | 55.60              | 41.92           | 60.30    | 116.13        | 18.00                | 30.32           | 80.45    | 233.86        |
| Rho-NonO | MC5R               | Melanocortin receptor 5 (MC5-R)                                 | MC5R        | 325         | 71.25              | 55.39           | 88.40    | 144.24        | 36.70                | 56.80           | 88.00    | 419.03        |
| Rho-NonO | MCHR1 GPR24 MCHR1  | Melanin-concentrating hormone receptor (MCHR1)                  | MCHR1       | 422         | 50.95              | 88.05           | 76.90    | 112.78        | 62.00                | 36.18           | 96.30    | 347.40        |
| Rho-NonO | MCHR2 GPR145 MCHR2 | Melanin-concentrating hormone receptor (MCHR2)                  | MCHR2       | 340         | 36.80              | 84.87           | 73.55    | 97.67         | 63.70                | 51.71           | 93.45    | 437.31        |
| Rho-NonO | MRGPRD MRGD        | Mas-related G-protein coupled receptor (MRGPRD)                 | MRGRD       | 321         | 83.10              | 55.31           | 97.85    | 448.57        | 75.25                | 41.20           | 93.85    | 300.54        |
| Rho-NonO | MRGPRE GPR16       | Mas-related G-protein coupled receptor (MRGPRE)                 | MRGRE       | 311         | 84.10              | 87.87           | 71.20    | 67.19         | 88.55                | 107.69          | 82.05    | 304.58        |
| Rho-NonO | MRGPRF GPR14       | Mas-related G-protein coupled receptor (MRGPRF)                 | MRGRF       | 343         | 82.55              | 60.82           | 98.40    | 303.59        | 62.85                | 67.39           | 92.40    | 269.03        |
| Rho-NonO | MRGPRG GPR16       | Mas-related G-protein coupled receptor (MRGPRG)                 | MRGRG       | 289         | 52.35              | 43.13           | 84.60    | 106.10        | 49.50                | 15.63           | 84.70    | 32.31         |
| Rho-NonO | MRGPRX1 MRGX1      | Mas-related G-protein coupled receptor (MRGPRX1)                | MRGX1       | 322         | 46.15              | 49.48           | 90.85    | 145.52        | 77.10                | 42.11           | 92.40    | 305.58        |
| Rho-NonO | MRGPRX2 MRGX2      | Mas-related G-protein coupled receptor (MRGPRX2)                | MRGX2       | 330         | 52.60              | 53.13           | 94.40    | 379.54        | 77.40                | 30.42           | 91.50    | 232.06        |
| Rho-NonO | MRGPRX3 MRGX3      | Mas-related G-protein coupled receptor (MRGPRX3)                | MRGX3       | 322         | 72.75              | 45.23           | 97.05    | 269.31        | 77.90                | 36.96           | 94.45    | 517.21        |
| Rho-NonO | MRGPRX4 MRGX4      | Mas-related G-protein coupled receptor (MRGPRX4)                | MRGX4       | 322         | 66.25              | 123.95          | 72.35    | 67.34         | 44.35                | 91.82           | 75.30    | 81.96         |
| Rho-NonO | MC1R MSHR          | Melanocyte-stimulating hormone receptor (MSHR)                  | MSHR        | 317         | 41.65              | 115.44          | 89.80    | 312.94        | 51.75                | 58.34           | 70.70    | 211.88        |
| Rho-NonO | MLNR GPR38 MLNR    | Motilin receptor (G-protein coupled receptor) (MLNR)            | MTLR        | 412         | 50.35              | 44.44           | 81.10    | 62.39         | 73.00                | 35.48           | 89.95    | 237.06        |
| Rho-NonO | MTNR1A             | Melatonin receptor type 1A (Melatonin receptor) (MTNR1A)        | MTR1A       | 350         | 36.50              | 40.95           | 80.05    | 64.61         | 69.40                | 42.12           | 96.65    | 442.21        |
| Rho-NonO | MTNR1B             | Melatonin receptor type 1B (Melatonin receptor) (MTNR1B)        | MTR1B       | 362         | 34.40              | 68.01           | 75.50    | 88.47         | 71.50                | 45.52           | 95.15    | 435.66        |
| Rho-NonO | GPR50              | Melatonin-related receptor (G-protein coupled receptor) (GPR50) | MTR1L       | 617         | 47.50              | 48.28           | 92.35    | 86.79         | 75.35                | 25.72           | 82.20    | 227.90        |
| Rho-NonO | TACR1 NK1R TACR1   | Substance-P receptor (SPR) (NK1R)                               | NK1R        | 407         | 76.15              | 53.93           | 94.85    | 111.81        | 53.00                | 25.70           | 74.95    | 56.13         |
| Rho-NonO | TACR2 NK2R TACR2   | Substance-K receptor (SKR) (NK2R)                               | NK2R        | 398         | 71.35              | 81.47           | 94.40    | 140.94        | 48.15                | 51.39           | 76.60    | 108.29        |
| Rho-NonO | TACR3 NK3R TACR3   | Neuromedin-K receptor (NKR) (NK3R)                              | NK3R        | 465         | 52.70              | 51.33           | 95.65    | 173.03        | 76.35                | 29.84           | 92.60    | 223.04        |

Table S1. Comprehensive Protein Expression Data for 826 GPCRs

| Family   | Gene_names     | Protein_names                     | Target name | WT-aa-count | Nt_BRIL constructs |                 |          |               | ICL3_BRIL constructs |                 |          |               |
|----------|----------------|-----------------------------------|-------------|-------------|--------------------|-----------------|----------|---------------|----------------------|-----------------|----------|---------------|
|          |                |                                   |             |             | surface(%)         | surface density | total(%) | total density | surface(%)           | surface density | total(%) | total density |
| Rho-NonO | NMBR           | Neuromedin-B receptor (NMB-R)     | NMBR        | 390         | 29.00              | 53.98           | 68.30    | 67.76         | 77.30                | 46.03           | 95.00    | 485.58        |
| Rho-NonO | NMUR1 GPR66    | Neuromedin-U receptor 1 (NMU)     | NMUR1       | 426         | 74.30              | 20.65           | 52.65    | 25.14         | 29.65                | 63.90           | 88.40    | 364.52        |
| Rho-NonO | NMUR2 NMUR2R   | Neuromedin-U receptor 2 (NMU)     | NMUR2       | 415         | 53.20              | 49.75           | 86.10    | 85.48         | 43.65                | 24.92           | 81.00    | 31.04         |
| Rho-NonO | NPBWR1 GPR7    | Neuropeptides B/W receptor typ    | NPBW1       | 328         | 50.70              | 163.37          | 97.45    | 578.37        | 49.50                | 114.52          | 92.00    | 424.59        |
| Rho-NonO | NPBWR2 GPR8    | Neuropeptides B/W receptor typ    | NPBW2       | 333         | 42.45              | 89.37           | 96.30    | 430.84        | 30.90                | 47.06           | 90.45    | 156.73        |
| Rho-NonO | NPFFR1 GPR147  | Neuropeptide FF receptor 1 (G-p   | NPFF1       | 430         | 40.65              | 75.27           | 82.50    | 101.50        | 48.75                | 34.37           | 94.15    | 497.46        |
| Rho-NonO | NPFFR2 GPR74   | Neuropeptide FF receptor 2 (G-p   | NPFF2       | 522         | 51.60              | 96.94           | 98.15    | 314.74        | 28.50                | 43.53           | 87.35    | 245.40        |
| Rho-NonO | NPSR1 GPR154   | Neuropeptide S receptor (G-prot   | NPSR1       | 371         | 75.25              | 113.39          | 97.25    | 484.33        | 44.85                | 47.55           | 71.35    | 82.47         |
| Rho-NonO | NPY1R NPYR NP  | Neuropeptide Y receptor type 1    | NPY1R       | 384         | 29.30              | 76.03           | 83.60    | 144.32        | 89.45                | 64.89           | 89.90    | 309.37        |
| Rho-NonO | NPY2R          | Neuropeptide Y receptor type 2    | NPY2R       | 381         | 12.30              | 63.24           | 43.45    | 92.15         | 20.20                | 29.82           | 79.90    | 270.60        |
| Rho-NonO | PPYR1 NPY4R    | Neuropeptide Y receptor type 4    | NPY4R       | 375         | 32.35              | 118.66          | 75.75    | 111.71        | 31.40                | 44.04           | 89.85    | 233.94        |
| Rho-NonO | NPY5R NPYR5    | Neuropeptide Y receptor type 5    | NPY5R       | 445         | 25.00              | 123.71          | 40.15    | 71.70         | 65.45                | 52.30           | 97.35    | 496.37        |
| Rho-NonO | NPY6R NPY1RL Y | Putative neuropeptide Y recepto   | NPY6R       | 290         | 66.20              | 75.54           | 94.00    | 200.50        | 55.65                | 24.33           | 97.45    | 141.70        |
| Rho-NonO | NTSR1 NTRR     | Neurotensin receptor type 1 (NT   | NTR1        | 418         | 53.30              | 189.24          | 96.65    | 618.41        | 66.60                | 172.20          | 94.75    | 793.11        |
| Rho-NonO | NTSR2          | Neurotensin receptor type 2 (NT   | NTR2        | 410         | 46.10              | 113.57          | 96.50    | 468.83        | 58.85                | 71.53           | 92.55    | 484.27        |
| Rho-NonO | GPR68 OGR1     | Ovarian cancer G-protein couple   | OGR1        | 365         | 60.10              | 95.67           | 96.65    | 530.74        | 47.30                | 36.10           | 92.30    | 281.99        |
| Rho-NonO | OPN3 ECPN      | Opsin-3 (Encephalopsin) (Panops   | OPN3        | 402         | 53.35              | 76.06           | 93.85    | 276.53        | 74.35                | 146.08          | 94.45    | 730.90        |
| Rho-NonO | OPN4 MOP       | Melanopsin (Opsin-4)              | OPN4        | 478         | 45.20              | 82.98           | 84.80    | 123.83        | 71.15                | 107.04          | 91.10    | 456.15        |
| Rho-NonO | OPN5 GPR136 P  | Opsin-5 (G-protein coupled rece   | OPN5        | 354         | 52.30              | 103.04          | 95.60    | 404.17        | 64.35                | 126.42          | 94.35    | 774.32        |
| Rho-NonO | OPRD1 OPRD     | Delta-type opioid receptor (D-O   | OPRD        | 372         | 37.75              | 44.89           | 66.05    | 68.44         | 27.10                | 86.55           | 90.25    | 249.79        |
| Rho-NonO | OPRK1 OPRK     | Kappa-type opioid receptor (K-C   | OPRK        | 380         | 19.15              | 48.10           | 72.45    | 91.54         | 39.35                | 26.44           | 74.15    | 229.09        |
| Rho-NonO | OPRM1 MOR1     | Mu-type opioid receptor (M-OR     | OPRM        | 400         | 35.70              | 44.88           | 79.85    | 139.98        | 48.20                | 30.27           | 55.95    | 262.07        |
| Rho-NonO | OPRL1 OOR ORL  | Nociceptin receptor (Kappa-type   | OPRX        | 370         | 50.35              | 63.50           | 96.65    | 273.03        | 51.35                | 32.81           | 90.25    | 281.40        |
| Rho-NonO | OPN1SW BCP     | Short-wave-sensitive opsin 1 (Blu | OPSD        | 348         | 89.85              | 92.19           | 93.30    | 800.47        | 91.45                | 55.30           | 86.05    | 1,035.60      |
| Rho-NonO | RHO OPN2       | Rhodopsin (Opsin-2)               | OPSD        | 348         | 97.00              | 396.31          | 61.15    | 216.61        | 94.45                | 190.03          | 39.95    | 315.71        |
| Rho-NonO | OPN1MW GCP;    | Medium-wave-sensitive opsin 1     | OPSG        | 364         | 93.10              | 97.20           | 95.75    | 177.12        | 95.70                | 227.89          | 84.05    | 308.09        |
| Rho-NonO | OPN1LW RCP     | Long-wave-sensitive opsin 1 (Rec  | OPSR        | 364         | 60.60              | 77.81           | 93.00    | 151.03        | 93.90                | 141.82          | 86.80    | 417.43        |
| Rho-NonO | RRH            | Visual pigment-like receptor per  | OPSX        | 337         | 71.50              | 75.97           | 93.85    | 179.45        | 42.25                | 36.90           | 64.45    | 79.31         |
| Rho-NonO | HCRTR1         | Orexin receptor type 1 (Ox-1-R)   | OX1R        | 425         | 74.65              | 48.05           | 96.70    | 626.99        | 74.85                | 27.55           | 94.75    | 411.98        |
| Rho-NonO | HCRTR2         | Orexin receptor type 2 (Ox-2-R)   | OX2R        | 444         | 54.55              | 78.79           | 81.35    | 90.45         | 50.80                | 26.76           | 87.00    | 255.64        |
| Rho-NonO | OXER1 GPR170   | Oxoecosanoid receptor 1 (5-oxo    | OXER1       | 423         | 66.95              | 100.37          | 98.10    | 654.73        | 77.65                | 52.04           | 96.45    | 351.30        |
| Rho-NonO | OXGR1 GPR80 G  | 2-oxoglutarate receptor 1 (Alpha  | OXGR1       | 337         | 37.20              | 80.45           | 37.50    | 73.18         | 69.20                | 29.61           | 94.55    | 303.00        |
| Rho-NonO | OXTR           | Oxytocin receptor (OT-R)          | OXYR        | 389         | 79.15              | 80.10           | 98.30    | 414.24        | 74.70                | 36.65           | 83.60    | 56.58         |
| Rho-NonO | P2RY1          | P2Y purinoceptor 1 (P2Y1) (ATP    | P2RY1       | 373         | 43.85              | 52.19           | 70.75    | 76.83         | 74.40                | 26.52           | 93.25    | 190.27        |
| Rho-NonO | P2RY2 P2RU1    | P2Y purinoceptor 2 (P2Y2) (ATP r  | P2RY2       | 377         | 50.80              | 40.28           | 82.25    | 81.84         | 81.30                | 41.28           | 97.05    | 330.88        |
| Rho-NonO | P2RY4 NRU      | P2Y purinoceptor 4 (P2Y4) (P2P)   | P2RY4       | 365         | 52.40              | 50.64           | 79.45    | 85.49         | 79.55                | 44.67           | 97.05    | 295.01        |
| Rho-NonO | P2RY6 PP2891   | P2Y purinoceptor 6 (P2Y6)         | P2RY6       | 328         | 67.70              | 70.83           | 96.55    | 449.18        | 68.65                | 56.12           | 96.50    | 266.45        |
| Rho-NonO | P2RY8          | P2Y purinoceptor 8 (P2Y8)         | P2RY8       | 359         | 64.60              | 88.67           | 97.95    | 501.51        | 64.25                | 33.29           | 93.15    | 198.99        |
| Rho-NonO | P2RY10         | Putative P2Y purinoceptor 10 (P2  | P2Y10       | 339         | 14.20              | 117.38          | 38.40    | 136.57        | 60.70                | 24.05           | 95.25    | 303.20        |
| Rho-NonO | P2RY11         | P2Y purinoceptor 11 (P2Y11)       | P2Y11       | 374         | 78.55              | 111.37          | 97.70    | 587.06        | 68.40                | 35.86           | 84.65    | 74.01         |

Table S1. Comprehensive Protein Expression Data for 826 GPCRs

| Family   | Gene_names    | Protein_names                                       | Target name | WT-aa-count | Nt_BRIL constructs |                 |          |               | ICL3_BRIL constructs |                 |          |               |
|----------|---------------|-----------------------------------------------------|-------------|-------------|--------------------|-----------------|----------|---------------|----------------------|-----------------|----------|---------------|
|          |               |                                                     |             |             | surface(%)         | surface density | total(%) | total density | surface(%)           | surface density | total(%) | total density |
| Rho-NonO | P2RY12 HORK3  | P2Y purinoceptor 12 (P2Y12) (G-protein coupled)     | P2Y12       | 342         | 40.80              | 71.45           | 89.00    | 401.70        | 51.75                | 179.70          | 88.95    | 770.32        |
| Rho-NonO | P2RY13 GPR86  | P2Y purinoceptor 13 (P2Y13) (G-protein coupled)     | P2Y13       | 354         | 20.43              | 58.42           | 49.15    | 27.72         | 79.65                | 27.37           | 96.10    | 537.48        |
| Rho-NonO | P2RY14 GPR105 | P2Y purinoceptor 14 (P2Y14) (G-protein coupled)     | P2Y14       | 338         | 58.45              | 70.07           | 75.55    | 72.61         | 77.05                | 96.87           | 95.50    | 731.41        |
| Rho-NonO | F2R CF2R PAR1 | Proteinase-activated receptor 1                     | PAR1        | 425         | 84.40              | 53.04           | 88.25    | 102.36        | 92.85                | 47.53           | 86.25    | 101.03        |
| Rho-NonO | F2RL1 GPR11   | Proteinase-activated receptor 2                     | PAR2        | 397         | 73.35              | 77.42           | 98.05    | 271.61        | 62.30                | 23.53           | 95.20    | 238.78        |
| Rho-NonO | F2RL2 PAR3    | Proteinase-activated receptor 3                     | PAR3        | 374         | 86.30              | 101.69          | 98.15    | 434.04        | 76.45                | 24.05           | 94.80    | 151.66        |
| Rho-NonO | F2RL3 PAR4    | Proteinase-activated receptor 4                     | PAR4        | 385         | 27.25              | 198.29          | 60.15    | 178.65        | 75.60                | 48.13           | 95.55    | 285.13        |
| Rho-NonO | PTGDR         | Prostaglandin D2 receptor (PGD)                     | PD2R        | 359         | 77.95              | 72.90           | 90.25    | 80.85         | 74.10                | 41.01           | 95.55    | 651.73        |
| Rho-NonO | PTGDR2 CRTH2  | Prostaglandin D2 receptor 2 (Chemokine)             | PD2R2       | 395         | 42.60              | 62.95           | 48.70    | 69.91         | 86.30                | 88.87           | 98.05    | 690.59        |
| Rho-NonO | PTGER1        | Prostaglandin E2 receptor EP1 subtype               | PE2R1       | 402         | 65.75              | 56.68           | 97.40    | 266.64        | 62.50                | 81.21           | 96.35    | 905.06        |
| Rho-NonO | PTGER2        | Prostaglandin E2 receptor EP2 subtype               | PE2R2       | 358         | 40.80              | 115.00          | 60.40    | 122.48        | 63.05                | 231.11          | 96.25    | 923.72        |
| Rho-NonO | PTGER3        | Prostaglandin E2 receptor EP3 subtype               | PE2R3       | 390         | 38.40              | 34.56           | 23.70    | 32.48         | 77.70                | 45.55           | 95.10    | 469.19        |
| Rho-NonO | PTGER4 PTGER2 | Prostaglandin E2 receptor EP4 subtype               | PE2R4       | 488         | 71.20              | 128.93          | 96.70    | 565.99        | 53.05                | 66.41           | 92.35    | 678.18        |
| Rho-NonO | PTGFR         | Prostaglandin F2-alpha receptor                     | PF2R        | 359         | 40.65              | 41.93           | 37.95    | 44.63         | 54.75                | 35.63           | 79.95    | 394.18        |
| Rho-NonO | PTGIR PRIPR   | Prostacyclin receptor (Prostaglandin I2)            | PI2R        | 386         | 77.00              | 143.18          | 97.90    | 436.95        | 61.85                | 134.47          | 93.65    | 667.38        |
| Rho-NonO | PROKR1 GPR73  | Prokineticin receptor 1 (PK-R1) (G-protein coupled) | PKR1        | 393         | 41.65              | 115.44          | 89.80    | 312.94        | 30.95                | 71.41           | 95.75    | 218.21        |
| Rho-NonO | PROKR2 GPR73L | Prokineticin receptor 2 (PK-R2) (G-protein coupled) | PKR2        | 384         | 64.20              | 69.33           | 92.35    | 138.97        | 46.55                | 49.85           | 60.95    | 59.04         |
| Rho-NonO | PRLHR GPR10 G | Prolactin-releasing peptide receptor                | PRLHR       | 370         | 42.20              | 46.73           | 85.55    | 85.36         | 45.10                | 25.34           | 95.60    | 485.01        |
| Rho-NonO | GPR65 TDAG8   | Psychosine receptor (G-protein coupled)             | PSYR        | 337         | 9.20               | 127.49          | 47.85    | 148.03        | 49.15                | 19.80           | 93.95    | 141.85        |
| Rho-NonO | PTAFR PAFR    | Platelet-activating factor receptor                 | PTAFR       | 342         | 27.25              | 109.38          | 50.70    | 112.80        | 51.95                | 24.15           | 91.85    | 300.18        |
| Rho-NonO | QRFPR GPR103  | Pyroglutamylated RFamide peptide receptor           | QRFPR       | 431         | 28.55              | 115.61          | 48.10    | 118.01        | 55.40                | 25.54           | 94.05    | 228.88        |
| Rho-NonO | RGR           | RPE-retinal G protein-coupled receptor              | RGR         | 291         | 83.30              | 277.40          | 97.75    | 924.27        | 37.45                | 61.75           | 45.10    | 63.87         |
| Rho-NonO | RXFP3 RLN3R1  | Relaxin-3 receptor 1 (RLN3 receptor)                | RL3R1       | 469         | 47.20              | 99.67           | 68.40    | 111.80        | 84.55                | 60.30           | 95.80    | 548.73        |
| Rho-NonO | RXFP4 GPR100  | Relaxin-3 receptor 2 (RLN3 receptor)                | RL3R2       | 374         | 29.00              | 90.19           | 46.05    | 98.52         | 71.35                | 81.47           | 94.40    | 140.94        |
| Rho-NonO | RXFP1 LGR7    | Relaxin receptor 1 (Leucine-rich repeat)            | RXFP1       | 757         | 25.95              | 93.95           | 36.20    | 70.67         | 50.90                | 55.33           | 76.05    | 267.84        |
| Rho-NonO | RXFP2 GPR106  | Relaxin receptor 2 (G-protein coupled)              | RXFP2       | 754         | 57.60              | 103.32          | 70.90    | 73.77         | 61.25                | 67.33           | 87.75    | 149.91        |
| Rho-NonO | S1PR1 CHEDG1  | Sphingosine 1-phosphate receptor 1                  | S1PR1       | 382         | 81.50              | 46.72           | 90.35    | 249.48        | 94.50                | 133.40          | 62.30    | 209.51        |
| Rho-NonO | S1PR2 EDG5    | Sphingosine 1-phosphate receptor 2                  | S1PR2       | 353         | 36.40              | 72.22           | 77.70    | 227.05        | 31.85                | 48.90           | 76.90    | 429.97        |
| Rho-NonO | S1PR3 EDG3    | Sphingosine 1-phosphate receptor 3                  | S1PR3       | 378         | 40.95              | 70.50           | 42.85    | 46.28         | 63.25                | 37.68           | 92.85    | 237.91        |
| Rho-NonO | S1PR4 EDG6    | Sphingosine 1-phosphate receptor 4                  | S1PR4       | 384         | 34.95              | 35.59           | 69.30    | 292.29        | 65.25                | 47.21           | 85.30    | 675.09        |
| Rho-NonO | S1PR5 EDG8    | Sphingosine 1-phosphate receptor 5                  | S1PR5       | 398         | 69.15              | 55.86           | 63.45    | 47.05         | 89.10                | 48.42           | 88.40    | 258.49        |
| Rho-NonO | SSTR1         | Somatostatin receptor type 1 (SSR)                  | SSR1        | 391         | 73.70              | 80.49           | 96.00    | 608.24        | 46.45                | 46.67           | 62.40    | 47.78         |
| Rho-NonO | SSTR2         | Somatostatin receptor type 2 (SSR)                  | SSR2        | 369         | 53.60              | 49.95           | 74.80    | 170.50        | 79.95                | 47.91           | 53.00    | 245.07        |
| Rho-NonO | SSTR3         | Somatostatin receptor type 3 (SSR)                  | SSR3        | 418         | 79.55              | 43.55           | 93.05    | 229.36        | 38.40                | 38.16           | 53.30    | 45.14         |
| Rho-NonO | SSTR4         | Somatostatin receptor type 4 (SSR)                  | SSR4        | 388         | 71.10              | 81.83           | 96.45    | 605.11        | 58.15                | 48.54           | 73.45    | 51.07         |
| Rho-NonO | SSTR5         | Somatostatin receptor type 5 (SSR)                  | SSR5        | 364         | 56.75              | 39.86           | 89.05    | 324.78        | 34.45                | 53.10           | 53.50    | 52.42         |
| Rho-NonO | SUCNR1 GPR91  | Succinate receptor 1 (G-protein coupled)            | SUCR1       | 334         | 69.90              | 80.32           | 92.85    | 129.48        | 38.90                | 35.94           | 62.50    | 64.90         |
| Rho-NonO | TBXA2R        | Thromboxane A2 receptor (TXA2)                      | TA2R        | 343         | 34.90              | 35.63           | 72.20    | 191.75        | 58.75                | 118.23          | 92.40    | 749.28        |
| Rho-NonO | TAAR1 TA1 TAR | Trace amine-associated receptor 1                   | TAAR1       | 339         | 53.50              | 57.78           | 89.95    | 91.37         | 27.20                | 27.89           | 46.50    | 30.31         |
| Rho-NonO | TAAR2 GPR58   | Trace amine-associated receptor 2                   | TAAR2       | 351         | 61.95              | 64.51           | 84.95    | 80.45         | 44.50                | 29.72           | 60.55    | 35.66         |

Table S1. Comprehensive Protein Expression Data for 826 GPCRs

| Family   | Gene_names     | Protein_names                    | Target name | WT-aa-count | Nt_BRIL constructs |                 |          |               | ICL3_BRIL constructs |                 |          |               |
|----------|----------------|----------------------------------|-------------|-------------|--------------------|-----------------|----------|---------------|----------------------|-----------------|----------|---------------|
|          |                |                                  |             |             | surface(%)         | surface density | total(%) | total density | surface(%)           | surface density | total(%) | total density |
| Rho-NonO | TAAR3 GPR57    | Putative trace amine-associated  | TAAR3       | 343         | 21.95              | 175.75          | 51.60    | 216.37        | 48.30                | 35.00           | 91.85    | 188.30        |
| Rho-NonO | TAAR5 PNR      | Trace amine-associated receptor  | TAAR5       | 337         | 70.50              | 60.83           | 94.15    | 108.11        | 75.05                | 44.31           | 98.05    | 309.58        |
| Rho-NonO | TAAR6 TA4 TAR  | Trace amine-associated receptor  | TAAR6       | 345         | 60.80              | 89.25           | 89.65    | 136.25        | 33.75                | 27.92           | 39.50    | 28.19         |
| Rho-NonO | TAAR8 GPR102   | Trace amine-associated receptor  | TAAR8       | 342         | 59.70              | 80.27           | 87.60    | 139.91        | 42.25                | 31.63           | 58.95    | 44.19         |
| Rho-NonO | TAAR9 TA3 TAR  | Trace amine-associated receptor  | TAAR9       | 348         | 47.15              | 75.77           | 81.10    | 121.29        | 39.80                | 25.23           | 40.85    | 39.79         |
| Rho-NonO | TRHR           | Thyrotropin-releasing hormone r  | TRFR        | 398         | 87.70              | 59.48           | 98.20    | 402.50        | 88.85                | 72.71           | 97.35    | 296.30        |
| Rho-NonO | TSHR LGR3      | Thyrotropin receptor (Thyroid-st | TSHR        | 764         | 18.40              | 49.48           | 27.30    | 56.04         | 68.25                | 33.01           | 89.95    | 391.72        |
| Rho-NonO | UTS2R GPR14    | Urotensin-2 receptor (UR-2-R) (G | UR2R        | 389         | 71.35              | 44.42           | 93.80    | 73.47         | 83.60                | 135.67          | 90.40    | 156.75        |
| Rho-NonO | AVPR1A AVPR1   | Vasopressin V1a receptor (V1aR)  | V1AR        | 418         | 62.35              | 112.68          | 87.35    | 135.29        | 74.05                | 78.58           | 82.75    | 107.34        |
| Rho-NonO | AVPR1B AVPR3   | Vasopressin V1b receptor (V1bR)  | V1BR        | 424         | 75.90              | 182.08          | 97.65    | 711.95        | 28.35                | 93.54           | 96.00    | 521.59        |
| Rho-NonO | AVPR2 ADHR DI  | Vasopressin V2 receptor (V2R) (A | V2R         | 371         | 76.50              | 161.99          | 97.05    | 580.85        | 55.50                | 67.43           | 79.95    | 121.16        |
| Rho-NonO | VN1R2 V1RL2    | Vomeronasal type-1 receptor 2 (  | VN1R2       | 395         | 42.15              | 62.49           | 82.20    | 382.79        | 64.20                | 86.60           | 94.95    | 560.50        |
| Rho-NonO | VN1R3 V1RL3 FK | Vomeronasal type-1 receptor 3 (  | VN1R3       | 311         | 63.85              | 95.42           | 95.60    | 546.82        | 56.05                | 22.02           | 93.25    | 89.19         |
| Rho-NonO | VN1R4 V1RL4    | Vomeronasal type-1 receptor 4 (  | VN1R4       | 301         | 45.80              | 70.87           | 45.15    | 46.46         | 67.55                | 19.60           | 93.10    | 79.06         |
| Rho-NonO | VN1R5 V1RL5    | Vomeronasal type-1 receptor 5 (  | VN1R5       | 357         | 34.25              | 79.84           | 36.85    | 60.10         | 55.10                | 20.94           | 81.60    | 51.80         |
| Rho-NonO | VN1R17P VNRL4  | Putative vomeronasal receptor-li | VNRL4       | 208         | 63.35              | 130.96          | 97.15    | 447.86        | 55.90                | 58.71           | 90.65    | 132.61        |
| Rho-NonO | XCR1 CXCR1 G   | Chemokine XC receptor 1 (G-pro   | XCR1        | 333         | 34.40              | 25.65           | 58.90    | 45.17         | 57.20                | 44.61           | 95.60    | 354.10        |
| Rho-NonO | VN1R1 V1RL1 V  | Vomeronasal type-1 receptor 1 (  | VN1R1       | 353         | 37.10              | 67.15           | 93.15    | 327.02        | 60.30                | 38.18           | 96.70    | 299.60        |
| Rho-Olf  | OR10A2 OR10A2  | Olfactory receptor 10A2 (HP4) (C | O10A2       | 303         | 59.95              | 138.47          | 96.40    | 617.80        | 39.90                | 28.65           | 93.25    | 99.06         |
| Rho-Olf  | OR10A3         | Olfactory receptor 10A3 (HTPCR)  | O10A3       | 314         | 77.30              | 128.03          | 97.65    | 937.93        | 5.30                 | 30.03           | 11.25    | 47.05         |
| Rho-Olf  | OR10A4 OR10A4  | Olfactory receptor 10A4 (HP2) (C | O10A4       | 315         | 17.65              | 187.54          | 49.25    | 97.41         | 16.80                | 20.12           | 45.10    | 23.24         |
| Rho-Olf  | OR10A5 OR10A5  | Olfactory receptor 10A5 (HP3) (C | O10A5       | 317         | 41.30              | 86.86           | 58.70    | 84.75         | 7.05                 | 42.63           | 12.70    | 19.82         |
| Rho-Olf  | OR10A6         | Olfactory receptor 10A6 (Olfacto | O10A6       | 314         | 53.75              | 83.76           | 97.45    | 691.59        | 63.50                | 21.52           | 76.85    | 49.89         |
| Rho-Olf  | OR10A7         | Olfactory receptor 10A7 (Olfacto | O10A7       | 316         | 34.25              | 53.64           | 91.55    | 690.76        | 39.20                | 19.02           | 76.85    | 24.10         |
| Rho-Olf  | OR10AC1P OR10  | Putative olfactory receptor 10AC | O10AC       | 325         | 41.00              | 70.89           | 53.75    | 63.47         | 18.20                | 28.22           | 47.10    | 74.13         |
| Rho-Olf  | OR10AD1 OR10   | Olfactory receptor 10AD1 (Olfact | O10AD       | 317         | 60.10              | 175.57          | 94.35    | 397.82        | 21.90                | 20.15           | 93.00    | 119.88        |
| Rho-Olf  | OR10AG1        | Olfactory receptor 10AG1 (Olfact | O10AG       | 301         | 40.55              | 81.13           | 53.50    | 64.70         | 49.40                | 28.22           | 93.50    | 64.72         |
| Rho-Olf  | OR10C1 OR10C2  | Olfactory receptor 10C1 (Hs6M1-  | O10C1       | 312         | 28.10              | 170.49          | 63.20    | 127.51        | 30.65                | 24.32           | 95.20    | 54.45         |
| Rho-Olf  | OR10D3 OR10D3  | Putative olfactory receptor 10D3 | O10D3       | 312         | 16.70              | 101.72          | 30.85    | 95.86         | 10.55                | 18.36           | 21.25    | 16.25         |
| Rho-Olf  | OR10D4P OR10D  | Putative olfactory receptor 10D4 | O10D4       | 298         | 64.85              | 137.82          | 97.00    | 611.71        | 39.85                | 18.91           | 88.25    | 54.96         |
| Rho-Olf  | OR10G2         | Olfactory receptor 10G2          | O10G2       | 310         | 42.70              | 116.46          | 93.90    | 230.36        | 13.95                | 29.80           | 64.15    | 76.97         |
| Rho-Olf  | OR10G3         | Olfactory receptor 10G3 (Olfacto | O10G3       | 313         | 52.00              | 123.97          | 91.05    | 292.92        | 25.20                | 43.49           | 60.90    | 48.17         |
| Rho-Olf  | OR10G4         | Olfactory receptor 10G4 (Olfacto | O10G4       | 311         | 18.85              | 160.48          | 54.85    | 102.37        | 24.25                | 30.98           | 66.25    | 33.76         |
| Rho-Olf  | OR10G6 OR10G6  | Olfactory receptor 10G6 (Olfacto | O10G6       | 332         | 21.45              | 88.50           | 35.15    | 68.54         | 45.60                | 17.52           | 64.60    | 16.98         |
| Rho-Olf  | OR10G7         | Olfactory receptor 10G7 (Olfacto | O10G7       | 311         | 17.70              | 135.30          | 55.50    | 101.47        | 15.00                | 17.34           | 17.70    | 20.17         |
| Rho-Olf  | OR10G8         | Olfactory receptor 10G8 (Olfacto | O10G8       | 311         | 65.35              | 75.33           | 97.45    | 796.14        | 21.35                | 34.08           | 70.25    | 34.87         |
| Rho-Olf  | OR10G9 OR10G9  | Olfactory receptor 10G9 (Olfacto | O10G9       | 311         | 28.15              | 88.80           | 58.65    | 91.52         | 22.50                | 52.46           | 89.75    | 70.41         |
| Rho-Olf  | OR10H1         | Olfactory receptor 10H1 (Olfacto | O10H1       | 318         | 48.45              | 159.05          | 71.40    | 113.83        | 23.70                | 25.29           | 52.35    | 35.25         |
| Rho-Olf  | OR10H2         | Olfactory receptor 10H2 (Olfacto | O10H2       | 315         | 66.55              | 177.94          | 76.15    | 209.70        | 42.95                | 43.62           | 73.45    | 222.45        |



Table S1. Comprehensive Protein Expression Data for 826 GPCRs

| Family  | Gene_names     | Protein_names                    | Target name | WT-aa-count | Nt_BRIL constructs |                 |          |               | ICL3_BRIL constructs |                 |          |               |
|---------|----------------|----------------------------------|-------------|-------------|--------------------|-----------------|----------|---------------|----------------------|-----------------|----------|---------------|
|         |                |                                  |             |             | surface(%)         | surface density | total(%) | total density | surface(%)           | surface density | total(%) | total density |
| Rho-Olf | OR10H3         | Olfactory receptor 10H3 (Olfacto | O10H3       | 316         | 56.40              | 131.56          | 93.25    | 205.47        | 60.20                | 52.95           | 92.15    | 85.31         |
| Rho-Olf | OR10H4         | Olfactory receptor 10H4 (Olfacto | O10H4       | 316         | 21.30              | 76.09           | 42.05    | 106.71        | 4.95                 | 47.84           | 6.05     | 32.56         |
| Rho-Olf | OR10H5         | Olfactory receptor 10H5 (Olfacto | O10H5       | 315         | 78.00              | 129.47          | 96.50    | 397.10        | 52.40                | 37.82           | 91.45    | 339.15        |
| Rho-Olf | OR10J1         | Olfactory receptor 10J1 (Olfacto | O10J1       | 320         | 63.70              | 55.87           | 97.20    | 656.48        | 13.45                | 46.11           | 85.45    | 158.82        |
| Rho-Olf | OR10J3 OR10J3P | Olfactory receptor 10J3          | O10J3       | 329         | 21.70              | 50.85           | 76.95    | 119.82        | 38.15                | 17.50           | 88.10    | 27.45         |
| Rho-Olf | OR10J4 OR10J4P | Olfactory receptor 10J4          | O10J4       | 311         | 9.80               | 160.25          | 23.20    | 82.91         | 19.70                | 22.38           | 58.50    | 24.86         |
| Rho-Olf | OR10J5         | Olfactory receptor 10J5 (Olfacto | O10J5       | 309         | 74.75              | 74.34           | 89.50    | 1,671.49      | 9.75                 | 36.27           | 67.75    | 69.07         |
| Rho-Olf | OR10J6P OR10J6 | Putative olfactory receptor 10J6 | O10J6       | 276         | 54.20              | 131.36          | 95.30    | 526.27        | 25.75                | 19.87           | 88.25    | 51.10         |
| Rho-Olf | OR10K1         | Olfactory receptor 10K1 (Olfacto | O10K1       | 313         | 47.15              | 77.18           | 94.05    | 394.08        | 25.05                | 42.88           | 92.90    | 146.59        |
| Rho-Olf | OR10K2         | Olfactory receptor 10K2 (Olfacto | O10K2       | 312         | 51.10              | 45.33           | 95.55    | 484.22        | 8.90                 | 24.99           | 91.85    | 40.43         |
| Rho-Olf | OR10P1 OR10P1P | Olfactory receptor 10P1 (Olfacto | O10P1       | 313         | 31.70              | 122.36          | 46.25    | 77.38         | 19.45                | 31.79           | 52.15    | 40.29         |
| Rho-Olf | OR10Q1         | Olfactory receptor 10Q1 (Olfacto | O10Q1       | 319         | 47.60              | 336.62          | 57.25    | 206.74        | 9.40                 | 20.40           | 63.60    | 38.51         |
| Rho-Olf | OR10R2         | Olfactory receptor 10R2 (Olfacto | O10R2       | 335         | 42.85              | 67.13           | 91.55    | 483.58        | 42.50                | 16.76           | 87.50    | 40.22         |
| Rho-Olf | OR10S1         | Olfactory receptor 10S1 (Olfacto | O10S1       | 331         | 19.40              | 70.33           | 41.90    | 86.71         | 37.85                | 25.45           | 94.35    | 64.50         |
| Rho-Olf | OR10T2         | Olfactory receptor 10T2 (Olfacto | O10T2       | 314         | 46.10              | 56.11           | 96.00    | 502.81        | 29.70                | 14.27           | 83.15    | 28.12         |
| Rho-Olf | OR10V1         | Olfactory receptor 10V1 (Olfacto | O10V1       | 309         | 69.55              | 82.24           | 85.45    | 1,010.96      | 17.25                | 19.45           | 49.25    | 39.97         |
| Rho-Olf | OR10W1 OR10W1P | Olfactory receptor 10W1 (Olfacto | O10W1       | 305         | 72.05              | 156.49          | 97.85    | 802.78        | 21.70                | 22.88           | 57.55    | 29.50         |
| Rho-Olf | OR10X1 OR10X1P | Olfactory receptor 10X1 (Olfacto | O10X1       | 326         | 94.35              | 137.14          | 94.20    | 403.51        | 34.45                | 15.50           | 83.60    | 98.89         |
| Rho-Olf | OR10Z1         | Olfactory receptor 10Z1 (Olfacto | O10Z1       | 313         | 34.25              | 68.59           | 90.95    | 365.62        | 7.75                 | 52.79           | 57.00    | 19.46         |
| Rho-Olf | OR11A1 OR11A1P | Olfactory receptor 11A1 (Hs6M1)  | O11A1       | 315         | 75.20              | 127.67          | 97.65    | 942.10        | 25.95                | 31.87           | 97.55    | 109.05        |
| Rho-Olf | OR11G2         | Olfactory receptor 11G2 (Olfacto | O11G2       | 345         | 37.80              | 78.54           | 42.85    | 58.52         | 7.10                 | 16.80           | 10.05    | 16.74         |
| Rho-Olf | OR11H1         | Olfactory receptor 11H1 (Olfacto | O11H1       | 326         | 74.85              | 126.80          | 96.85    | 906.18        | 41.00                | 13.90           | 54.40    | 19.63         |
| Rho-Olf | OR11H2 C14orf1 | Olfactory receptor 11H2 (Olfacto | O11H2       | 326         | 76.20              | 133.12          | 97.25    | 909.89        | 23.41                | 21.66           | 61.75    | 31.60         |
| Rho-Olf | OR11H4         | Olfactory receptor 11H4 (Olfacto | O11H4       | 324         | 34.75              | 85.48           | 47.20    | 64.00         | 37.25                | 23.78           | 94.10    | 76.61         |
| Rho-Olf | OR11H6         | Olfactory receptor 11H6 (Olfacto | O11H6       | 330         | 75.05              | 175.22          | 97.95    | 727.86        | 8.50                 | 39.07           | 17.00    | 29.38         |
| Rho-Olf | OR11H7 OR11H7P | Olfactory receptor 11H7 (Olfacto | O11H7       | 314         | 35.30              | 92.73           | 92.45    | 420.30        | 17.90                | 28.13           | 95.40    | 62.83         |
| Rho-Olf | OR11H12        | Olfactory receptor 11H12         | O11HC       | 326         | 30.75              | 51.94           | 80.30    | 134.55        | 45.30                | 13.82           | 49.30    | 23.34         |
| Rho-Olf | OR11L1         | Olfactory receptor 11L1          | O11L1       | 322         | 43.35              | 69.38           | 91.25    | 377.57        | 18.40                | 34.50           | 92.00    | 95.44         |
| Rho-Olf | OR12D2         | Olfactory receptor 12D2 (Hs6M1)  | O12D2       | 307         | 42.80              | 82.20           | 92.05    | 188.28        | 25.30                | 22.99           | 60.00    | 55.98         |
| Rho-Olf | OR12D3         | Olfactory receptor 12D3 (Hs6M1)  | O12D3       | 316         | 35.40              | 71.67           | 44.20    | 75.23         | 32.35                | 21.84           | 53.95    | 18.96         |
| Rho-Olf | OR13A1         | Olfactory receptor 13A1 (Olfacto | O13A1       | 328         | 46.00              | 76.55           | 93.25    | 735.16        | 18.25                | 24.07           | 63.55    | 62.39         |
| Rho-Olf | OR13C2         | Olfactory receptor 13C2 (Olfacto | O13C2       | 318         | 40.35              | 53.49           | 59.40    | 50.48         | 15.00                | 26.32           | 88.15    | 65.57         |
| Rho-Olf | OR13C3         | Olfactory receptor 13C3 (Olfacto | O13C3       | 347         | 14.60              | 109.57          | 25.60    | 70.07         | 46.85                | 25.09           | 72.65    | 72.10         |
| Rho-Olf | OR13C4         | Olfactory receptor 13C4 (Olfacto | O13C4       | 318         | 40.90              | 134.14          | 82.95    | 174.07        | 14.20                | 22.26           | 75.75    | 33.53         |
| Rho-Olf | OR13C5         | Olfactory receptor 13C5 (Olfacto | O13C5       | 318         | 31.65              | 146.32          | 94.50    | 617.64        | 38.05                | 28.85           | 96.05    | 73.38         |
| Rho-Olf | OR13C8         | Olfactory receptor 13C8          | O13C8       | 320         | 10.10              | 58.37           | 19.25    | 52.43         | 22.40                | 89.60           | 75.70    | 62.21         |
| Rho-Olf | OR13C9         | Olfactory receptor 13C9 (Olfacto | O13C9       | 318         | 22.35              | 58.02           | 90.10    | 518.76        | 37.15                | 18.33           | 88.50    | 97.83         |
| Rho-Olf | OR13D1         | Olfactory receptor 13D1 (Olfacto | O13D1       | 346         | 24.45              | 44.47           | 87.25    | 672.43        | 23.25                | 15.00           | 48.95    | 27.15         |
| Rho-Olf | OR13F1         | Olfactory receptor 13F1 (Olfacto | O13F1       | 319         | 25.20              | 62.73           | 52.80    | 58.56         | 7.60                 | 79.36           | 8.80     | 16.79         |
| Rho-Olf | OR13G1         | Olfactory receptor 13G1 (Olfacto | O13G1       | 307         | 33.85              | 79.62           | 69.60    | 84.03         | 21.75                | 31.08           | 76.70    | 54.84         |

Table S1. Comprehensive Protein Expression Data for 826 GPCRs

| Family  | Gene_names    | Protein_names                    | Target name | WT-aa-count | Nt_BRIL constructs |                 |          |               | ICL3_BRIL constructs |                 |          |               |
|---------|---------------|----------------------------------|-------------|-------------|--------------------|-----------------|----------|---------------|----------------------|-----------------|----------|---------------|
|         |               |                                  |             |             | surface(%)         | surface density | total(%) | total density | surface(%)           | surface density | total(%) | total density |
| Rho-Olf | OR13H1        | Olfactory receptor 13H1 (Olfacto | O13H1       | 308         | 64.05              | 153.34          | 88.45    | 148.07        | 14.70                | 29.69           | 46.80    | 16.76         |
| Rho-Olf | OR13J1        | Olfactory receptor 13J1 (Olfacto | O13J1       | 312         | 59.25              | 229.33          | 95.95    | 520.31        | 44.90                | 58.07           | 95.80    | 98.43         |
| Rho-Olf | OR14A2 OR5AX  | Olfactory receptor 14A2 (Olfacto | O14A2       | 314         | 50.80              | 192.61          | 88.15    | 172.85        | 15.70                | 32.86           | 58.20    | 62.65         |
| Rho-Olf | OR14A16 OR5A  | Olfactory receptor 14A16 (Olfact | O14AG       | 309         | 43.90              | 113.95          | 81.35    | 577.76        | 47.15                | 23.53           | 81.75    | 82.02         |
| Rho-Olf | OR14C36 OR5BF | Olfactory receptor 14C36 (Olfact | O14CZ       | 312         | 57.90              | 52.47           | 97.25    | 815.43        | 52.20                | 33.50           | 92.40    | 230.30        |
| Rho-Olf | OR14I1 OR5BU1 | Olfactory receptor 14I1 (Olfacto | O14I1       | 311         | 55.20              | 82.72           | 96.95    | 522.35        | 42.45                | 41.51           | 82.40    | 134.23        |
| Rho-Olf | OR14J1 OR5U1  | Olfactory receptor 14J1 (Hs6M1-  | O14J1       | 321         | 30.20              | 95.49           | 54.90    | 83.15         | 16.80                | 49.46           | 62.85    | 88.02         |
| Rho-Olf | OR14K1 OR5AY1 | Olfactory receptor 14K1 (Olfacto | O14K1       | 314         | 40.85              | 168.22          | 92.55    | 548.97        | 38.85                | 22.19           | 82.60    | 87.55         |
| Rho-Olf | OR14L1P OR5AV | Putative olfactory receptor 14L1 | O14L1       | 308         | 12.15              | 72.92           | 35.70    | 57.09         | 9.70                 | 41.55           | 35.40    | 17.58         |
| Rho-Olf | OR2A12 OR2A12 | Olfactory receptor 2A12 (Olfacto | O2A12       | 310         | 44.25              | 62.88           | 84.35    | 160.32        | 21.75                | 33.16           | 31.85    | 34.34         |
| Rho-Olf | OR2A14 OR2A14 | Olfactory receptor 2A14 (OST182  | O2A14       | 310         | 69.35              | 111.05          | 89.75    | 510.42        | 23.78                | 511.65          | 49.38    | 356.63        |
| Rho-Olf | OR2A25 OR2A25 | Olfactory receptor 2A25 (Olfacto | O2A25       | 310         | 24.20              | 184.84          | 49.75    | 139.64        | 47.20                | 22.65           | 93.25    | 60.17         |
| Rho-Olf | OR2AE1 OR2AE2 | Olfactory receptor 2AE1 (Olfacto | O2AE1       | 323         | 55.20              | 74.59           | 93.65    | 249.01        | 35.45                | 28.52           | 83.05    | 81.72         |
| Rho-Olf | OR2AG1 OR2AG  | Olfactory receptor 2AG1 (HT3) (C | O2AG1       | 316         | 21.30              | 120.62          | 41.35    | 108.02        | 19.40                | 22.32           | 93.20    | 37.38         |
| Rho-Olf | OR2AG2 OR2AG  | Olfactory receptor 2AG2          | O2AG2       | 316         | 19.80              | 132.94          | 32.65    | 77.13         | 10.45                | 35.49           | 87.10    | 32.45         |
| Rho-Olf | OR2AJ1 OR2AJ1 | Olfactory receptor 2AJ1          | O2AJ1       | 328         | 35.75              | 62.36           | 81.85    | 181.74        | 45.55                | 13.49           | 50.50    | 14.37         |
| Rho-Olf | OR2AK2 OR2AK  | Olfactory receptor 2AK2 (Olfacto | O2AK2       | 335         | 70.10              | 208.45          | 78.55    | 162.78        | 10.90                | 30.65           | 87.20    | 41.69         |
| Rho-Olf | OR2AP1 OR2AP  | Olfactory receptor 2AP1 (Olfacto | O2AP1       | 309         | 28.05              | 73.11           | 43.45    | 57.62         | 20.15                | 24.72           | 75.55    | 55.26         |
| Rho-Olf | OR2AT4        | Olfactory receptor 2AT4 (Olfacto | O2AT4       | 320         | 25.75              | 289.60          | 46.95    | 115.83        | 15.95                | 20.56           | 63.75    | 25.07         |
| Rho-Olf | OR2T10        | Olfactory receptor 2T10 (Olfacto | O2T10       | 312         | 16.85              | 91.33           | 45.35    | 66.09         | 10.60                | 37.27           | 27.30    | 37.34         |
| Rho-Olf | OR2T11        | Olfactory receptor 2T11 (Olfacto | O2T11       | 316         | 37.95              | 56.71           | 91.60    | 663.22        | 33.20                | 20.90           | 75.55    | 58.19         |
| Rho-Olf | OR2T12        | Olfactory receptor 2T12 (Olfacto | O2T12       | 320         | 70.95              | 92.95           | 90.30    | 1,363.52      | 20.65                | 21.83           | 81.75    | 80.88         |
| Rho-Olf | OR2T27        | Olfactory receptor 2T27 (Olfacto | O2T27       | 317         | 50.15              | 320.15          | 94.45    | 979.57        | 26.60                | 30.11           | 91.80    | 58.49         |
| Rho-Olf | OR2T29        | Olfactory receptor 2T29          | O2T29       | 315         | 60.55              | 138.48          | 96.50    | 377.46        | 36.80                | 11.77           | 44.10    | 13.80         |
| Rho-Olf | OR2T33        | Olfactory receptor 2T33 (Olfacto | O2T33       | 320         | 38.95              | 68.72           | 47.58    | 56.27         | 22.55                | 26.03           | 49.10    | 28.09         |
| Rho-Olf | OR2T34        | Olfactory receptor 2T34 (Olfacto | O2T34       | 318         | 45.80              | 184.30          | 59.45    | 113.23        | 54.45                | 95.25           | 96.30    | 414.02        |
| Rho-Olf | OR2T35        | Olfactory receptor 2T35 (Olfacto | O2T35       | 323         | 34.40              | 75.59           | 54.75    | 55.16         | 55.15                | 25.71           | 86.90    | 171.61        |
| Rho-Olf | OR4A15        | Olfactory receptor 4A15 (Olfacto | O4A15       | 344         | 43.85              | 97.17           | 59.95    | 80.07         | 42.45                | 22.28           | 94.15    | 44.83         |
| Rho-Olf | OR4A16        | Olfactory receptor 4A16 (Olfacto | O4A16       | 328         | 23.55              | 74.77           | 77.55    | 154.63        | 14.80                | 20.90           | 63.05    | 33.66         |
| Rho-Olf | OR4A47        | Olfactory receptor 4A47 (Olfacto | O4A47       | 309         | 26.65              | 95.06           | 44.15    | 81.89         | 54.25                | 32.29           | 80.80    | 92.28         |
| Rho-Olf | OR4C45        | Olfactory receptor 4C45          | O4C45       | 311         | 64.60              | 110.22          | 92.85    | 383.50        | 26.65                | 25.52           | 65.90    | 31.14         |
| Rho-Olf | OR4C46        | Olfactory receptor 4C46          | O4C46       | 309         | 32.55              | 54.78           | 86.15    | 235.87        | 15.10                | 28.46           | 82.10    | 74.77         |
| Rho-Olf | OR4F15        | Olfactory receptor 4F15 (Olfacto | O4F15       | 312         | 38.60              | 156.21          | 47.20    | 89.79         | 22.90                | 30.21           | 63.35    | 58.96         |
| Rho-Olf | OR4F17 OR4F11 | Olfactory receptor 4F17 (Olfacto | O4F17       | 305         | 46.60              | 171.82          | 61.45    | 182.51        | 5.20                 | 60.28           | 43.30    | 33.26         |
| Rho-Olf | OR4F21 OR4F21 | Olfactory receptor 4F21          | O4F21       | 312         | 27.10              | 109.90          | 46.25    | 72.85         | 33.45                | 22.84           | 43.75    | 21.40         |
| Rho-Olf | OR51A2        | Olfactory receptor 51A2          | O51A2       | 313         | 34.10              | 57.11           | 80.35    | 150.01        | 32.00                | 33.26           | 89.40    | 39.08         |
| Rho-Olf | OR51A4        | Olfactory receptor 51A4          | O51A4       | 313         | 57.75              | 83.12           | 95.85    | 451.79        | 13.50                | 19.93           | 43.15    | 24.63         |
| Rho-Olf | OR51A7        | Olfactory receptor 51A7 (Olfacto | O51A7       | 312         | 66.10              | 117.18          | 90.80    | 179.70        | 11.40                | 18.36           | 37.80    | 28.52         |
| Rho-Olf | OR51B2 OR51B  | Olfactory receptor 51B2 (Odoran  | O51B2       | 312         | 77.75              | 118.85          | 95.70    | 335.42        | 50.80                | 20.25           | 68.00    | 30.86         |
| Rho-Olf | OR51B4        | Olfactory receptor 51B4 (Odoran  | O51B4       | 310         | 64.60              | 116.56          | 97.90    | 549.11        | 20.40                | 23.15           | 95.10    | 71.07         |

Table S1. Comprehensive Protein Expression Data for 826 GPCRs

| Family  | Gene_names     | Protein_names                    | Target name | WT-aa-count | Nt_BRIL constructs |                 |          |               | ICL3_BRIL constructs |                 |          |               |
|---------|----------------|----------------------------------|-------------|-------------|--------------------|-----------------|----------|---------------|----------------------|-----------------|----------|---------------|
|         |                |                                  |             |             | surface(%)         | surface density | total(%) | total density | surface(%)           | surface density | total(%) | total density |
| Rho-Olf | OR51B5         | Olfactory receptor 51B5 (Odoran  | O51B5       | 312         | 53.55              | 100.04          | 93.95    | 397.63        | 15.55                | 43.60           | 12.95    | 30.77         |
| Rho-Olf | OR51B6         | Olfactory receptor 51B6 (Odoran  | O51B6       | 312         | 59.25              | 91.41           | 94.80    | 305.11        | 36.40                | 42.02           | 93.80    | 155.56        |
| Rho-Olf | OR51D1         | Olfactory receptor 51D1 (Olfacto | O51D1       | 324         | 38.95              | 123.39          | 44.20    | 76.98         | 58.15                | 33.89           | 83.00    | 151.93        |
| Rho-Olf | OR51E1 GPR164  | Olfactory receptor 51E1 (D-GPCR  | O51E1       | 317         | 38.25              | 70.86           | 90.55    | 317.18        | 24.65                | 17.76           | 35.20    | 14.03         |
| Rho-Olf | OR51E2 PSGR    | Olfactory receptor 51E2 (HPRAJ)  | O51E2       | 320         | 54.85              | 113.97          | 90.75    | 178.51        | 12.45                | 48.61           | 36.35    | 21.95         |
| Rho-Olf | OR51F1 OR51F1  | Olfactory receptor 51F1          | O51F1       | 319         | 38.70              | 140.31          | 69.50    | 105.05        | 12.55                | 19.82           | 61.90    | 42.50         |
| Rho-Olf | OR51F2         | Olfactory receptor 51F2 (Olfacto | O51F2       | 342         | 13.15              | 114.34          | 26.60    | 91.89         | 5.55                 | 19.69           | 38.60    | 25.55         |
| Rho-Olf | OR51G1 OR51G1  | Olfactory receptor 51G1 (Olfacto | O51G1       | 321         | 79.90              | 35.41           | 97.35    | 257.84        | 40.15                | 28.92           | 37.60    | 27.75         |
| Rho-Olf | OR51G2         | Olfactory receptor 51G2 (Olfacto | O51G2       | 314         | 61.00              | 171.58          | 95.90    | 719.47        | 43.80                | 33.15           | 94.80    | 54.97         |
| Rho-Olf | OR51H1P OR51H1 | Putative olfactory receptor 51H1 | O51H1       | 302         | 52.60              | 69.24           | 94.85    | 259.91        | 39.50                | 47.00           | 87.25    | 123.05        |
| Rho-Olf | OR51I1         | Olfactory receptor 51I1 (Odorant | O51I1       | 314         | 54.75              | 125.90          | 58.55    | 77.24         | 51.40                | 23.49           | 71.55    | 110.87        |
| Rho-Olf | OR51I2         | Olfactory receptor 51I2 (Odorant | O51I2       | 312         | 42.70              | 203.69          | 92.00    | 476.96        | 46.55                | 17.50           | 85.35    | 50.88         |
| Rho-Olf | OR51J1 OR51J1  | Olfactory receptor 51J1 (Odorant | O51J1       | 316         | 41.40              | 76.43           | 96.85    | 839.51        | 23.00                | 14.79           | 51.65    | 15.34         |
| Rho-Olf | OR51L1         | Olfactory receptor 51L1 (Olfacto | O51L1       | 315         | 35.70              | 71.41           | 41.45    | 67.11         | 20.30                | 26.76           | 95.75    | 62.46         |
| Rho-Olf | OR51M1         | Olfactory receptor 51M1 (Odoran  | O51M1       | 315         | 33.95              | 72.16           | 95.40    | 242.76        | 8.00                 | 66.58           | 52.00    | 29.36         |
| Rho-Olf | OR51Q1         | Olfactory receptor 51Q1          | O51Q1       | 317         | 62.10              | 117.09          | 90.00    | 176.66        | 22.60                | 29.65           | 53.50    | 23.52         |
| Rho-Olf | OR51S1         | Olfactory receptor 51S1 (Olfacto | O51S1       | 323         | 36.15              | 171.42          | 82.45    | 218.53        | 19.95                | 37.26           | 56.20    | 29.89         |
| Rho-Olf | OR51T1         | Olfactory receptor 51T1 (Olfacto | O51T1       | 327         | 31.80              | 100.61          | 51.85    | 69.05         | 36.15                | 28.33           | 66.55    | 27.92         |
| Rho-Olf | OR51V1 OR51V1  | Olfactory receptor 51V1 (Odoran  | O51V1       | 321         | 40.30              | 124.96          | 95.00    | 403.31        | 54.30                | 24.47           | 93.45    | 149.80        |
| Rho-Olf | OR52A1         | Olfactory receptor 52A1 (HPFH1)  | O52A1       | 312         | 35.50              | 66.68           | 91.65    | 364.98        | 15.95                | 37.11           | 56.70    | 48.76         |
| Rho-Olf | OR52A4         | Putative olfactory receptor 52A4 | O52A4       | 304         | 18.30              | 114.75          | 93.95    | 412.07        | 29.65                | 14.25           | 79.75    | 28.22         |
| Rho-Olf | OR52A5         | Olfactory receptor 52A5 (Odoran  | O52A5       | 316         | 26.30              | 78.15           | 36.85    | 64.26         | 30.45                | 37.24           | 91.85    | 34.17         |
| Rho-Olf | OR52B2         | Olfactory receptor 52B2 (Olfacto | O52B2       | 323         | 61.40              | 226.45          | 71.65    | 177.44        | 11.05                | 19.88           | 73.00    | 99.05         |
| Rho-Olf | OR52B4         | Olfactory receptor 52B4 (Olfacto | O52B4       | 314         | 36.00              | 87.10           | 35.90    | 73.99         | 32.80                | 20.86           | 81.70    | 91.95         |
| Rho-Olf | OR52B6         | Olfactory receptor 52B6 (Olfacto | O52B6       | 335         | 31.90              | 74.51           | 45.75    | 73.10         | 28.10                | 46.90           | 67.75    | 66.58         |
| Rho-Olf | OR52D1         | Olfactory receptor 52D1 (Odoran  | O52D1       | 318         | 35.25              | 166.68          | 60.75    | 106.10        | 33.25                | 170.00          | 94.50    | 472.72        |
| Rho-Olf | OR52E1 OR52E1  | Olfactory receptor 52E1          | O52E1       | 308         | 58.25              | 85.72           | 95.50    | 726.75        | 22.50                | 17.80           | 81.55    | 25.33         |
| Rho-Olf | OR52E2         | Olfactory receptor 52E2          | O52E2       | 325         | 24.05              | 51.71           | 48.55    | 61.18         | 16.05                | 29.52           | 42.35    | 21.38         |
| Rho-Olf | OR52E4         | Olfactory receptor 52E4 (Olfacto | O52E4       | 312         | 43.75              | 69.89           | 96.55    | 399.48        | 33.40                | 31.43           | 84.05    | 112.00        |
| Rho-Olf | OR52E5         | Olfactory receptor 52E5          | O52E5       | 315         | 21.40              | 145.66          | 31.65    | 144.28        | 13.20                | 34.12           | 52.00    | 40.30         |
| Rho-Olf | OR52E6         | Olfactory receptor 52E6 (Olfacto | O52E6       | 313         | 30.40              | 83.35           | 46.35    | 78.10         | 13.10                | 19.21           | 30.45    | 17.84         |
| Rho-Olf | OR52E8         | Olfactory receptor 52E8 (Olfacto | O52E8       | 317         | 57.60              | 84.22           | 87.70    | 150.24        | 31.95                | 26.17           | 54.60    | 18.52         |
| Rho-Olf | OR52H1         | Olfactory receptor 52H1 (Olfacto | O52H1       | 320         | 23.50              | 103.57          | 42.30    | 90.27         | 20.05                | 46.36           | 92.10    | 44.17         |
| Rho-Olf | OR52I1         | Olfactory receptor 52I1 (Olfacto | O52I1       | 324         | 43.70              | 80.17           | 95.95    | 509.63        | 16.10                | 22.09           | 63.10    | 33.42         |
| Rho-Olf | OR52I2         | Olfactory receptor 52I2 (Olfacto | O52I2       | 350         | 14.50              | 146.78          | 50.50    | 58.76         | 15.45                | 20.42           | 58.35    | 31.12         |
| Rho-Olf | OR52J3         | Olfactory receptor 52J3 (Olfacto | O52J3       | 311         | 25.85              | 62.22           | 49.75    | 139.64        | 4.65                 | 16.52           | 8.60     | 15.17         |
| Rho-Olf | OR52K1         | Olfactory receptor 52K1 (Olfacto | O52K1       | 314         | 56.25              | 134.72          | 93.55    | 664.63        | 43.55                | 20.05           | 56.00    | 18.21         |
| Rho-Olf | OR52K2         | Olfactory receptor 52K2 (Olfacto | O52K2       | 314         | 46.50              | 81.87           | 95.85    | 498.76        | 8.90                 | 17.52           | 5.60     | 19.42         |
| Rho-Olf | OR52L1         | Olfactory receptor 52L1 (Olfacto | O52L1       | 329         | 38.85              | 140.84          | 87.25    | 340.39        | 21.75                | 18.13           | 81.05    | 107.03        |
| Rho-Olf | OR52L2P OR52L2 | Putative olfactory receptor 52L2 | O52L2       | 319         | 65.00              | 181.67          | 97.50    | 880.05        | 45.80                | 27.33           | 91.95    | 63.27         |

Table S1. Comprehensive Protein Expression Data for 826 GPCRs

| Family  | Gene_names     | Protein_names                     | Target name | WT-aa-count | Nt_BRIL constructs |                 |          |               | ICL3_BRIL constructs |                 |          |               |
|---------|----------------|-----------------------------------|-------------|-------------|--------------------|-----------------|----------|---------------|----------------------|-----------------|----------|---------------|
|         |                |                                   |             |             | surface(%)         | surface density | total(%) | total density | surface(%)           | surface density | total(%) | total density |
| Rho-Olf | OR52M1 OR52M1  | Olfactory receptor 52M1 (Olfacto  | O52M1       | 317         | 56.75              | 112.71          | 89.25    | 174.13        | 8.20                 | 46.18           | 30.45    | 24.52         |
| Rho-Olf | OR52N1         | Olfactory receptor 52N1 (Olfacto  | O52N1       | 320         | 8.75               | 50.90           | 61.20    | 156.48        | 45.05                | 18.56           | 88.10    | 58.48         |
| Rho-Olf | OR52N2         | Olfactory receptor 52N2 (Olfacto  | O52N2       | 321         | 22.70              | 66.39           | 44.55    | 74.56         | 16.40                | 28.88           | 42.10    | 20.16         |
| Rho-Olf | OR52N4         | Olfactory receptor 52N4 (Olfacto  | O52N4       | 321         | 32.90              | 49.42           | 52.85    | 71.69         | 17.75                | 39.85           | 91.20    | 106.22        |
| Rho-Olf | OR52N5         | Olfactory receptor 52N5 (Olfacto  | O52N5       | 324         | 38.70              | 117.44          | 53.20    | 77.54         | 27.85                | 24.84           | 61.95    | 52.67         |
| Rho-Olf | OR52P1P OR52P1 | Putative olfactory receptor 52P1  | O52P1       | 321         | 54.15              | 47.01           | 97.80    | 533.83        | 20.65                | 25.44           | 76.45    | 26.16         |
| Rho-Olf | OR52R1         | Olfactory receptor 52R1 (Olfacto  | O52R1       | 315         | 26.50              | 112.42          | 86.25    | 316.16        | 29.30                | 21.23           | 75.90    | 20.31         |
| Rho-Olf | OR52W1 OR52W1  | Olfactory receptor 52W1 (Olfacto  | O52W1       | 320         | 27.85              | 230.81          | 41.75    | 127.84        | 25.95                | 25.64           | 57.35    | 21.35         |
| Rho-Olf | OR52Z1 OR52Z1  | Olfactory receptor 52Z1           | O52Z1       | 297         | 17.05              | 109.21          | 32.70    | 103.80        | 26.15                | 28.47           | 90.30    | 86.15         |
| Rho-Olf | OR56A1         | Olfactory receptor 56A1 (Olfacto  | O56A1       | 318         | 54.60              | 64.17           | 46.85    | 69.43         | 48.80                | 21.73           | 93.45    | 38.67         |
| Rho-Olf | OR56A3 OR56A3  | Olfactory receptor 56A3 (Olfacto  | O56A3       | 315         | 55.05              | 76.31           | 3.15     | 24.55         | 36.15                | 50.45           | 24.60    | 23.53         |
| Rho-Olf | OR56A4         | Olfactory receptor 56A4 (Olfacto  | O56A4       | 313         | 80.30              | 155.94          | 97.90    | 801.58        | 52.70                | 14.24           | 56.60    | 14.48         |
| Rho-Olf | OR56A5 OR56A5  | Olfactory receptor 56A5           | O56A5       | 313         | 60.00              | 74.78           | 92.25    | 252.51        | 36.10                | 14.53           | 75.35    | 20.95         |
| Rho-Olf | OR56B1 OR56B1  | Olfactory receptor 56B1 (Olfacto  | O56B1       | 324         | 29.25              | 93.91           | 48.20    | 85.10         | 21.70                | 19.81           | 65.80    | 39.57         |
| Rho-Olf | OR56B2P        | Putative olfactory receptor 56B2  | O56B2       | 322         | 15.45              | 39.54           | 20.00    | 35.28         | 21.35                | 20.01           | 31.40    | 16.17         |
| Rho-Olf | OR56B4         | Olfactory receptor 56B4 (Olfacto  | O56B4       | 319         | 54.00              | 240.02          | 96.90    | 883.37        | 38.40                | 17.97           | 88.65    | 48.50         |
| Rho-Olf | OR5AC1 OR5AC1  | Olfactory receptor 5AC1 (Olfacto  | O5AC1       | 307         | 71.70              | 96.63           | 91.95    | 133.22        | 49.60                | 72.70           | 70.35    | 43.60         |
| Rho-Olf | OR5AC2         | Olfactory receptor 5AC2 (HSA1)    | O5AC2       | 309         | 37.00              | 68.72           | 45.70    | 66.92         | 58.40                | 32.39           | 97.25    | 147.73        |
| Rho-Olf | OR5AK2         | Olfactory receptor 5AK2           | O5AK2       | 309         | 31.40              | 43.25           | 81.95    | 145.48        | 31.65                | 14.38           | 42.10    | 18.85         |
| Rho-Olf | OR5AK3P OR5AK3 | Putative olfactory receptor 5AK3  | O5AK3       | 298         | 21.80              | 54.55           | 83.15    | 354.14        | 8.35                 | 15.68           | 74.35    | 32.59         |
| Rho-Olf | OR5AL1 OR5AL1  | Olfactory receptor 5AL1 (Olfacto  | O5AL1       | 328         | 21.90              | 66.16           | 34.00    | 55.38         | 28.33                | 16.09           | 58.70    | 30.00         |
| Rho-Olf | OR5AN1         | Olfactory receptor 5AN1 (Olfacto  | O5AN1       | 311         | 59.60              | 101.99          | 96.60    | 880.81        | 27.70                | 28.63           | 70.20    | 23.57         |
| Rho-Olf | OR5AP2         | Olfactory receptor 5AP2           | O5AP2       | 316         | 53.80              | 57.98           | 93.90    | 454.51        | 10.80                | 32.55           | 36.65    | 18.27         |
| Rho-Olf | OR5AR1         | Olfactory receptor 5AR1 (Olfacto  | O5AR1       | 310         | 11.20              | 83.21           | 24.45    | 79.93         | 10.95                | 44.53           | 88.65    | 34.72         |
| Rho-Olf | OR5AS1         | Olfactory receptor 5AS1 (Olfacto  | O5AS1       | 324         | 58.50              | 125.09          | 92.75    | 325.43        | 14.10                | 34.00           | 49.80    | 32.51         |
| Rho-Olf | OR5AU1         | Olfactory receptor 5AU1 (Olfacto  | O5AU1       | 362         | 24.05              | 158.08          | 39.95    | 58.76         | 17.80                | 58.21           | 95.25    | 108.11        |
| Rho-Olf | OR5H14         | Olfactory receptor 5H14           | O5H14       | 310         | 59.00              | 112.55          | 93.80    | 607.97        | 30.80                | 31.28           | 81.50    | 189.79        |
| Rho-Olf | OR5H15         | Olfactory receptor 5H15           | O5H15       | 313         | 64.45              | 165.93          | 93.10    | 217.81        | 26.55                | 27.06           | 57.85    | 22.21         |
| Rho-Olf | OR6C65         | Olfactory receptor 6C65           | O6C65       | 312         | 39.50              | 63.51           | 87.85    | 180.35        | 22.50                | 26.84           | 92.60    | 40.44         |
| Rho-Olf | OR6C68         | Olfactory receptor 6C68           | O6C68       | 312         | 38.55              | 89.25           | 93.60    | 296.43        | 27.75                | 28.88           | 94.30    | 77.48         |
| Rho-Olf | OR6C70         | Olfactory receptor 6C70           | O6C70       | 312         | 59.55              | 143.06          | 87.75    | 1,573.84      | 10.46                | 220.63          | 24.54    | 150.52        |
| Rho-Olf | OR6C74         | Olfactory receptor 6C74           | O6C74       | 312         | 43.20              | 143.00          | 67.90    | 125.17        | 21.15                | 34.71           | 90.40    | 40.04         |
| Rho-Olf | OR6C75         | Olfactory receptor 6C75           | O6C75       | 312         | 38.90              | 109.32          | 49.65    | 87.07         | 21.20                | 23.29           | 33.20    | 30.77         |
| Rho-Olf | OR6C76         | Olfactory receptor 6C76           | O6C76       | 312         | 37.45              | 49.61           | 88.60    | 275.09        | 14.30                | 16.09           | 77.65    | 54.55         |
| Rho-Olf | OR7E24 OR7E24  | Olfactory receptor 7E24 (Olfacto  | O7E24       | 339         | 12.15              | 94.14           | 87.10    | 852.24        | 32.40                | 17.33           | 64.75    | 52.99         |
| Rho-Olf | OR1A1          | Olfactory receptor 1A1 (Olfactory | OR1A1       | 309         | 35.40              | 141.95          | 86.95    | 1,358.96      | 54.80                | 20.78           | 73.85    | 78.76         |
| Rho-Olf | OR1A2          | Olfactory receptor 1A2 (Olfactory | OR1A2       | 309         | 29.10              | 53.39           | 73.70    | 521.63        | 9.85                 | 20.39           | 55.95    | 35.40         |
| Rho-Olf | OR1B1          | Olfactory receptor 1B1 (Olfactory | OR1B1       | 318         | 23.75              | 135.80          | 79.05    | 197.78        | 16.20                | 42.29           | 20.75    | 37.82         |
| Rho-Olf | OR1C1          | Olfactory receptor 1C1 (Olfactory | OR1C1       | 314         | 37.40              | 61.75           | 86.15    | 151.11        | 47.05                | 14.61           | 58.30    | 18.66         |
| Rho-Olf | OR1D2 OLF1R1   | Olfactory receptor 1D2 (Olfactory | OR1D2       | 312         | 30.60              | 137.45          | 49.75    | 70.44         | 44.75                | 40.25           | 97.50    | 166.71        |

Table S1. Comprehensive Protein Expression Data for 826 GPCRs

| Family  | Gene_names     | Protein_names                                            | Target name | WT-aa-count | Nt_BRIL constructs |                 |          |               | ICL3_BRIL constructs |                 |          |               |
|---------|----------------|----------------------------------------------------------|-------------|-------------|--------------------|-----------------|----------|---------------|----------------------|-----------------|----------|---------------|
|         |                |                                                          |             |             | surface(%)         | surface density | total(%) | total density | surface(%)           | surface density | total(%) | total density |
| Rho-Olf | OR1D4          | Olfactory receptor 1D4 (Olfactory receptor 1D4)          | OR1D4       | 311         | 32.60              | 150.96          | 92.60    | 558.87        | 39.90                | 28.65           | 93.25    | 99.06         |
| Rho-Olf | OR1D5          | Olfactory receptor 1D5 (Olfactory receptor 1D5)          | OR1D5       | 312         | 74.30              | 199.47          | 97.00    | 523.82        | 25.60                | 76.46           | 79.50    | 246.09        |
| Rho-Olf | OR1E1 OR1E5 O  | Olfactory receptor 1E1 (Olfactory receptor 1E1)          | OR1E1       | 314         | 41.70              | 113.09          | 56.95    | 103.20        | 16.30                | 70.94           | 27.00    | 29.24         |
| Rho-Olf | OR1E2 OR1E4    | Olfactory receptor 1E2 (Olfactory receptor 1E2)          | OR1E2       | 323         | 63.30              | 371.73          | 96.35    | 696.62        | 36.50                | 18.20           | 80.35    | 50.16         |
| Rho-Olf | OR1E3 OR1E3P   | Olfactory receptor 1E3 (Olfactory receptor 1E3)          | OR1E3       | 343         | 33.80              | 93.80           | 45.80    | 75.53         | 50.90                | 20.16           | 92.35    | 63.48         |
| Rho-Olf | OR1F1 OLFMF O  | Olfactory receptor 1F1 (Olfactory receptor 1F1)          | OR1F1       | 312         | 14.60              | 103.20          | 29.45    | 71.06         | 19.80                | 26.87           | 54.65    | 29.77         |
| Rho-Olf | OR1F2P OR1F2   | Putative olfactory receptor 1F2 (Olfactory receptor 1F2) | OR1F2       | 312         | 42.05              | 353.19          | 56.95    | 213.24        | 12.10                | 19.26           | 66.30    | 66.70         |
| Rho-Olf | OR1F12 OR1F12  | Olfactory receptor 1F12 (Hs6M1-12)                       | OR1FC       | 337         | 14.35              | 264.80          | 31.65    | 99.33         | 12.70                | 20.42           | 40.80    | 34.35         |
| Rho-Olf | OR1G1 OR1G2    | Olfactory receptor 1G1 (Olfactory receptor 1G1)          | OR1G1       | 313         | 18.25              | 87.01           | 37.65    | 96.27         | 16.45                | 25.43           | 91.10    | 97.49         |
| Rho-Olf | OR1I1          | Olfactory receptor 1I1 (Olfactory receptor 1I1)          | OR1I1       | 355         | 16.95              | 75.18           | 32.45    | 74.42         | 22.20                | 67.33           | 90.55    | 88.41         |
| Rho-Olf | OR1J1          | Olfactory receptor 1J1 (Olfactory receptor 1J1)          | OR1J1       | 322         | 73.80              | 177.42          | 97.75    | 973.39        | 11.00                | 47.58           | 15.95    | 43.77         |
| Rho-Olf | OR1J2 OR1J3 OR | Olfactory receptor 1J2 (HSA5) (HSA5)                     | OR1J2       | 313         | 22.05              | 208.95          | 85.65    | 245.96        | 24.85                | 22.29           | 58.95    | 30.03         |
| Rho-Olf | OR1J4          | Olfactory receptor 1J4 (HTPCRX0)                         | OR1J4       | 313         | 49.65              | 256.03          | 87.70    | 1,812.69      | 9.50                 | 336.79          | 34.32    | 224.29        |
| Rho-Olf | OR1K1          | Olfactory receptor 1K1                                   | OR1K1       | 316         | 17.50              | 174.52          | 33.15    | 106.53        | 16.85                | 15.13           | 79.70    | 25.25         |
| Rho-Olf | OR1L1 OR1L2    | Olfactory receptor 1L1 (Olfactory receptor 1L1)          | OR1L1       | 360         | 56.40              | 213.27          | 72.90    | 190.66        | 11.05                | 35.02           | 92.60    | 40.40         |
| Rho-Olf | OR1L3          | Olfactory receptor 1L3 (Olfactory receptor 1L3)          | OR1L3       | 324         | 30.75              | 98.17           | 42.45    | 103.78        | 50.85                | 25.88           | 95.65    | 60.23         |
| Rho-Olf | OR1L4 OR1L5    | Olfactory receptor 1L4 (OST046)                          | OR1L4       | 311         | 38.60              | 86.84           | 49.20    | 86.07         | 10.30                | 33.65           | 66.90    | 21.45         |
| Rho-Olf | OR1L6 OR1L7    | Olfactory receptor 1L6 (Olfactory receptor 1L6)          | OR1L6       | 347         | 65.45              | 184.97          | 93.75    | 362.82        | 23.60                | 28.02           | 64.80    | 35.94         |
| Rho-Olf | OR1L8          | Olfactory receptor 1L8 (Olfactory receptor 1L8)          | OR1L8       | 309         | 78.65              | 148.55          | 96.50    | 635.06        | 31.85                | 24.45           | 91.60    | 44.58         |
| Rho-Olf | OR1M1          | Olfactory receptor 1M1 (Olfactory receptor 1M1)          | OR1M1       | 313         | 27.40              | 102.26          | 39.20    | 72.74         | 32.60                | 29.88           | 69.65    | 36.49         |
| Rho-Olf | OR1N1 OR1N3    | Olfactory receptor 1N1 (Olfactory receptor 1N1)          | OR1N1       | 311         | 27.50              | 95.87           | 88.75    | 250.00        | 41.95                | 18.12           | 88.10    | 84.93         |
| Rho-Olf | OR1N2          | Olfactory receptor 1N2 (Olfactory receptor 1N2)          | OR1N2       | 330         | 36.85              | 101.86          | 50.65    | 81.65         | 19.60                | 36.58           | 94.40    | 77.03         |
| Rho-Olf | OR1P1 OR1P1P   | Olfactory receptor 1P1 (Olfactory receptor 1P1)          | OR1P1       | 330         | 35.70              | 142.92          | 57.40    | 96.91         | 53.20                | 15.26           | 42.35    | 20.36         |
| Rho-Olf | OR1Q1 OR1Q2 O  | Olfactory receptor 1Q1 (OST226)                          | OR1Q1       | 314         | 49.65              | 120.33          | 96.30    | 581.49        | 12.60                | 31.27           | 68.35    | 21.17         |
| Rho-Olf | OR1S1          | Olfactory receptor 1S1 (Olfactory receptor 1S1)          | OR1S1       | 325         | 42.45              | 87.00           | 82.80    | 109.22        | 39.95                | 23.06           | 71.30    | 41.68         |
| Rho-Olf | OR1S2          | Olfactory receptor 1S2 (Olfactory receptor 1S2)          | OR1S2       | 325         | 48.35              | 114.51          | 66.00    | 120.80        | 31.20                | 34.38           | 73.80    | 33.50         |
| Rho-Olf | OR2A1; OR2A42  | Olfactory receptor 2A1/2A42 (Olfactory receptor 2A1)     | OR2A1       | 310         | 32.60              | 101.90          | 91.80    | 306.26        | 9.10                 | 20.01           | 30.95    | 17.50         |
| Rho-Olf | OR2A2 OR2A17   | Olfactory receptor 2A2 (Olfactory receptor 2A2)          | OR2A2       | 318         | 69.75              | 90.56           | 97.35    | 451.08        | 43.45                | 24.36           | 95.30    | 72.54         |
| Rho-Olf | OR2A4 OR2A10   | Olfactory receptor 2A4 (Olfactory receptor 2A4)          | OR2A4       | 310         | 52.00              | 47.90           | 94.30    | 218.38        | 54.85                | 21.62           | 86.75    | 50.45         |
| Rho-Olf | OR2A5 OR2A26   | Olfactory receptor 2A5 (Olfactory receptor 2A5)          | OR2A5       | 311         | 79.65              | 143.74          | 98.45    | 538.18        | 58.80                | 39.43           | 95.05    | 245.27        |
| Rho-Olf | OR2A7          | Olfactory receptor 2A7 (Olfactory receptor 2A7)          | OR2A7       | 310         | 69.70              | 152.93          | 97.40    | 603.36        | 49.30                | 21.46           | 78.60    | 51.00         |
| Rho-Olf | OR2B2 OR2B9    | Olfactory receptor 2B2 (Hs6M1-12)                        | OR2B2       | 357         | 22.75              | 70.41           | 43.20    | 57.28         | 18.75                | 26.81           | 72.50    | 35.65         |
| Rho-Olf | OR2B3 OR2B3P   | Putative olfactory receptor 2B3 (Olfactory receptor 2B3) | OR2B3       | 313         | 57.00              | 148.02          | 73.00    | 101.99        | 20.95                | 24.03           | 48.35    | 26.44         |
| Rho-Olf | OR2B6 OR2B1 O  | Olfactory receptor 2B6 (Hs6M1-13)                        | OR2B6       | 313         | 14.95              | 55.39           | 32.25    | 57.39         | 12.55                | 19.55           | 23.20    | 16.64         |
| Rho-Olf | OR2B8P OR2B8   | Putative olfactory receptor 2B8 (Olfactory receptor 2B8) | OR2B8       | 312         | 32.80              | 62.97           | 71.40    | 542.45        | 9.95                 | 31.86           | 38.60    | 37.92         |
| Rho-Olf | OR2B11         | Olfactory receptor 2B11                                  | OR2BB       | 317         | 51.00              | 70.31           | 61.45    | 66.87         | 50.50                | 19.83           | 84.55    | 29.09         |
| Rho-Olf | OR2C1 OR2C2P   | Olfactory receptor 2C1 (OLFmf3)                          | OR2C1       | 312         | 53.35              | 81.20           | 92.15    | 330.57        | 43.00                | 18.45           | 78.25    | 58.21         |
| Rho-Olf | OR2C3 OR2C4 O  | Olfactory receptor 2C3 (Olfactory receptor 2C3)          | OR2C3       | 320         | 34.40              | 62.33           | 96.00    | 471.23        | 23.15                | 33.71           | 87.15    | 26.82         |
| Rho-Olf | OR2D2 OR2D1    | Olfactory receptor 2D2 (HB2) (Olfactory receptor 2D2)    | OR2D2       | 308         | 34.85              | 102.93          | 61.35    | 86.44         | 20.55                | 25.78           | 48.45    | 17.29         |
| Rho-Olf | OR2D3          | Olfactory receptor 2D3 (Olfactory receptor 2D3)          | OR2D3       | 330         | 8.70               | 40.67           | 43.20    | 171.93        | 26.45                | 35.66           | 68.00    | 80.88         |

Table S1. Comprehensive Protein Expression Data for 826 GPCRs

| Family  | Gene_names        | Protein_names                                            | Target name | WT-aa-count | Nt_BRIL constructs |                 |          |               | ICL3_BRIL constructs |                 |          |               |
|---------|-------------------|----------------------------------------------------------|-------------|-------------|--------------------|-----------------|----------|---------------|----------------------|-----------------|----------|---------------|
|         |                   |                                                          |             |             | surface(%)         | surface density | total(%) | total density | surface(%)           | surface density | total(%) | total density |
| Rho-Olf | OR2F1 OLF3 OR2F2  | Olfactory receptor 2F1 (Olfactory receptor 2F1)          | OR2F1       | 317         | 69.50              | 253.80          | 79.10    | 182.53        | 33.40                | 37.56           | 75.45    | 103.69        |
| Rho-Olf | OR2F2             | Olfactory receptor 2F2 (Olfactory receptor 2F2)          | OR2F2       | 317         | 45.65              | 86.11           | 60.50    | 71.77         | 41.80                | 20.31           | 78.40    | 43.96         |
| Rho-Olf | OR2G2             | Olfactory receptor 2G2 (Olfactory receptor 2G2)          | OR2G2       | 317         | 71.65              | 60.70           | 92.75    | 223.37        | 42.00                | 17.85           | 70.15    | 41.42         |
| Rho-Olf | OR2G3             | Olfactory receptor 2G3 (Olfactory receptor 2G3)          | OR2G3       | 309         | 18.70              | 69.76           | 46.25    | 56.59         | 25.70                | 30.13           | 90.20    | 41.31         |
| Rho-Olf | OR2G6             | Olfactory receptor 2G6 (Olfactory receptor 2G6)          | OR2G6       | 316         | 15.80              | 87.16           | 31.45    | 61.00         | 16.75                | 32.95           | 88.20    | 40.86         |
| Rho-Olf | OR2H1 OR2H6 OR2H7 | Olfactory receptor 2H1 (Hs6M1-1)                         | OR2H1       | 316         | 33.35              | 70.76           | 92.40    | 547.08        | 40.25                | 17.66           | 86.35    | 63.35         |
| Rho-Olf | OR2H2 FAT11 OLF3  | Olfactory receptor 2H2 (Hs6M1-2)                         | OR2H2       | 312         | 57.15              | 134.03          | 95.45    | 650.82        | 12.10                | 40.59           | 62.85    | 31.84         |
| Rho-Olf | OR2I1P OR2I2 OLF3 | Putative olfactory receptor 2I1 (F)                      | OR2I1       | 316         | 73.40              | 126.15          | 97.60    | 566.18        | 25.20                | 16.59           | 70.20    | 33.22         |
| Rho-Olf | OR2J1 OR2J1P      | Olfactory receptor 2J1 (Hs6M1-4)                         | OR2J1       | 312         | 40.70              | 94.60           | 95.60    | 502.87        | 37.95                | 27.64           | 87.65    | 29.29         |
| Rho-Olf | OR2J2             | Olfactory receptor 2J2 (Hs6M1-6)                         | OR2J2       | 312         | 25.85              | 109.02          | 36.45    | 66.69         | 43.85                | 12.72           | 23.65    | 17.77         |
| Rho-Olf | OR2J3             | Olfactory receptor 2J3 (Hs6M1-3)                         | OR2J3       | 311         | 33.60              | 158.91          | 78.80    | 189.92        | 24.75                | 39.88           | 60.20    | 33.21         |
| Rho-Olf | OR2K2 OR2AR1P     | Olfactory receptor 2K2 (HTPCRHO)                         | OR2K2       | 345         | 31.05              | 57.95           | 57.95    | 68.81         | 6.75                 | 31.86           | 26.60    | 21.40         |
| Rho-Olf | OR2L2 OR2L12 OLF3 | Olfactory receptor 2L2 (HTPCRHO)                         | OR2L2       | 312         | 27.70              | 63.61           | 39.25    | 60.65         | 32.50                | 17.56           | 63.95    | 35.93         |
| Rho-Olf | OR2L3             | Olfactory receptor 2L3 (Olfactory receptor 2L3)          | OR2L3       | 312         | 35.85              | 56.42           | 94.40    | 571.96        | 18.80                | 18.09           | 84.55    | 28.60         |
| Rho-Olf | OR2L5 OR2L11      | Olfactory receptor 2L5 (Olfactory receptor 2L5)          | OR2L5       | 312         | 30.85              | 71.41           | 88.15    | 307.51        | 16.60                | 28.45           | 80.50    | 38.20         |
| Rho-Olf | OR2L8             | Olfactory receptor 2L8 (Olfactory receptor 2L8)          | OR2L8       | 312         | 30.30              | 107.25          | 44.00    | 69.27         | 17.25                | 31.68           | 77.95    | 46.15         |
| Rho-Olf | OR2L13 OR2L14     | Olfactory receptor 2L13 (Olfactory receptor 2L13)        | OR2LD       | 312         | 36.35              | 121.83          | 45.85    | 109.06        | 16.50                | 19.13           | 70.50    | 72.55         |
| Rho-Olf | OR2M2             | Olfactory receptor 2M2 (OST423)                          | OR2M2       | 347         | 23.55              | 51.85           | 39.10    | 59.73         | 43.75                | 15.59           | 39.90    | 15.11         |
| Rho-Olf | OR2M3 OR2M3P      | Olfactory receptor 2M3 (Olfactory receptor 2M3)          | OR2M3       | 312         | 78.65              | 155.49          | 98.20    | 957.74        | 14.40                | 25.10           | 27.85    | 22.02         |
| Rho-Olf | OR2M4             | Olfactory receptor 2M4 (HTPCRHO)                         | OR2M4       | 311         | 36.70              | 76.25           | 51.90    | 55.18         | 52.70                | 19.63           | 94.45    | 34.04         |
| Rho-Olf | OR2M5 OR2M5P      | Olfactory receptor 2M5 (Olfactory receptor 2M5)          | OR2M5       | 312         | 67.15              | 160.33          | 96.30    | 498.56        | 17.95                | 19.63           | 52.60    | 17.81         |
| Rho-Olf | OR2M7             | Olfactory receptor 2M7 (Olfactory receptor 2M7)          | OR2M7       | 312         | 25.35              | 150.98          | 82.75    | 257.71        | 18.40                | 33.50           | 96.30    | 55.58         |
| Rho-Olf | OR2S2             | Olfactory receptor 2S2 (Olfactory receptor 2S2)          | OR2S1       | 319         | 48.10              | 94.29           | 97.45    | 550.73        | 46.05                | 32.24           | 96.30    | 155.78        |
| Rho-Olf | OR2T1             | Olfactory receptor 2T1 (Olfactory receptor 2T1)          | OR2T1       | 369         | 33.10              | 75.58           | 46.80    | 70.31         | 22.00                | 36.61           | 72.80    | 146.09        |
| Rho-Olf | OR2T2 OR2T2P      | Olfactory receptor 2T2 (Olfactory receptor 2T2)          | OR2T2       | 324         | 53.40              | 174.98          | 94.45    | 464.52        | 19.55                | 34.74           | 93.30    | 105.59        |
| Rho-Olf | OR2T3             | Olfactory receptor 2T3 (Olfactory receptor 2T3)          | OR2T3       | 318         | 38.45              | 236.51          | 59.75    | 131.93        | 48.75                | 98.84           | 98.00    | 543.57        |
| Rho-Olf | OR2T4             | Olfactory receptor 2T4 (Olfactory receptor 2T4)          | OR2T4       | 348         | 12.95              | 133.75          | 30.55    | 90.52         | 10.80                | 29.64           | 26.35    | 22.74         |
| Rho-Olf | OR2T5             | Olfactory receptor 2T5 (Olfactory receptor 2T5)          | OR2T5       | 315         | 71.95              | 120.02          | 98.10    | 549.76        | 25.30                | 29.91           | 84.30    | 38.76         |
| Rho-Olf | OR2T6 OR2T6P      | Olfactory receptor 2T6 (OST703)                          | OR2T6       | 308         | 35.00              | 140.80          | 56.75    | 106.18        | 38.25                | 21.13           | 67.70    | 28.33         |
| Rho-Olf | OR2T7 OR2T7P      | Olfactory receptor 2T7 (OST723)                          | OR2T7       | 308         | 31.85              | 81.36           | 56.40    | 78.02         | 35.70                | 22.55           | 92.65    | 56.59         |
| Rho-Olf | OR2T8 OR2T8P      | Olfactory receptor 2T8 (Olfactory receptor 2T8)          | OR2T8       | 312         | 32.10              | 72.64           | 53.45    | 67.74         | 38.45                | 29.77           | 89.50    | 26.27         |
| Rho-Olf | OR2V1             | Olfactory receptor 2V1 (Olfactory receptor 2V1)          | OR2V1       | 315         | 69.60              | 107.62          | 97.55    | 614.16        | 32.05                | 26.20           | 92.85    | 33.78         |
| Rho-Olf | OR2V2 OR2V3       | Olfactory receptor 2V2 (Olfactory receptor 2V2)          | OR2V2       | 315         | 27.05              | 91.88           | 40.15    | 74.08         | 14.60                | 20.15           | 39.85    | 21.59         |
| Rho-Olf | OR2W1             | Olfactory receptor 2W1 (Hs6M1-1)                         | OR2W1       | 320         | 42.35              | 93.86           | 93.70    | 401.43        | 41.95                | 22.09           | 93.00    | 64.66         |
| Rho-Olf | OR2W3 OR2W3P      | Olfactory receptor 2W3 (Olfactory receptor 2W3)          | OR2W3       | 314         | 31.55              | 76.23           | 67.65    | 73.37         | 20.35                | 30.91           | 74.20    | 38.45         |
| Rho-Olf | OR2W5 OR2W5P      | Putative olfactory receptor 2W5 (Olfactory receptor 2W5) | OR2W5       | 320         | 25.40              | 220.38          | 91.55    | 512.87        | 16.00                | 28.04           | 88.40    | 115.09        |
| Rho-Olf | OR2W6P OR2W6P     | Putative olfactory receptor 2W6 (Olfactory receptor 2W6) | OR2W6       | 318         | 18.15              | 106.34          | 69.75    | 677.44        | 33.10                | 16.92           | 96.15    | 48.73         |
| Rho-Olf | OR2Y1             | Olfactory receptor 2Y1 (Olfactory receptor 2Y1)          | OR2Y1       | 311         | 26.50              | 78.09           | 39.70    | 69.97         | 37.05                | 23.38           | 89.30    | 82.88         |
| Rho-Olf | OR2Z1 OR2Z2       | Olfactory receptor 2Z1 (Olfactory receptor 2Z1)          | OR2Z1       | 314         | 57.80              | 74.67           | 95.25    | 1,002.21      | 27.15                | 24.12           | 86.25    | 45.54         |
| Rho-Olf | OR3A1 OLFRA03     | Olfactory receptor 3A1 (Olfactory receptor 3A1)          | OR3A1       | 315         | 42.85              | 72.90           | 93.40    | 783.51        | 15.90                | 23.77           | 62.05    | 25.25         |

Table S1. Comprehensive Protein Expression Data for 826 GPCRs

| Family  | Gene_names     | Protein_names                      | Target name | WT-aa-count | Nt_BRIL constructs |                 |          |               | ICL3_BRIL constructs |                 |          |               |
|---------|----------------|------------------------------------|-------------|-------------|--------------------|-----------------|----------|---------------|----------------------|-----------------|----------|---------------|
|         |                |                                    |             |             | surface(%)         | surface density | total(%) | total density | surface(%)           | surface density | total(%) | total density |
| Rho-Olf | OR3A2 OLFRA04  | Olfactory receptor 3A2 (Olfactory) | OR3A2       | 321         | 22.45              | 130.02          | 92.00    | 818.21        | 17.15                | 27.92           | 42.60    | 18.93         |
| Rho-Olf | OR3A3 OR3A6 C  | Olfactory receptor 3A3 (Olfactory) | OR3A3       | 321         | 53.00              | 67.55           | 95.05    | 1,092.87      | 20.75                | 23.63           | 68.25    | 26.75         |
| Rho-Olf | OR3A4P OR3A4   | Putative olfactory receptor 3A4 (  | OR3A4       | 348         | 17.35              | 229.15          | 88.80    | 649.98        | 33.20                | 17.84           | 88.90    | 70.44         |
| Rho-Olf | OR4A4P         | Putative olfactory receptor 4A4 (  | OR4A4       | 299         | 43.50              | 83.58           | 4.30     | 60.88         | 10.55                | 19.44           | 50.10    | 28.39         |
| Rho-Olf | OR4A5          | Olfactory receptor 4A5 (Olfactory) | OR4A5       | 315         | 21.25              | 65.90           | 48.30    | 61.14         | 11.35                | 19.25           | 16.35    | 16.36         |
| Rho-Olf | OR4A8P OR4A8   | Putative olfactory receptor 4A8 (  | OR4A8       | 315         | 29.35              | 144.74          | 91.75    | 399.45        | 34.05                | 25.93           | 87.20    | 37.00         |
| Rho-Olf | OR4B1          | Olfactory receptor 4B1 (OST208)    | OR4B1       | 309         | 30.35              | 62.87           | 56.00    | 64.98         | 34.00                | 22.34           | 93.80    | 63.49         |
| Rho-Olf | OR4C3          | Olfactory receptor 4C3 (Olfactory) | OR4C3       | 302         | 51.00              | 151.08          | 92.75    | 283.71        | 38.15                | 23.68           | 73.95    | 155.35        |
| Rho-Olf | OR4C5          | Olfactory receptor 4C5 (Olfactory) | OR4C5       | 326         | 32.65              | 121.12          | 80.15    | 137.97        | 39.00                | 35.99           | 71.15    | 59.50         |
| Rho-Olf | OR4C6          | Olfactory receptor 4C6 (Olfactory) | OR4C6       | 309         | 34.75              | 74.68           | 87.40    | 447.69        | 40.55                | 17.32           | 80.65    | 32.08         |
| Rho-Olf | OR4C11 OR4C11  | Olfactory receptor 4C11 (Olfacto)  | OR4CB       | 310         | 59.95              | 69.14           | 96.50    | 515.12        | 20.65                | 31.32           | 86.40    | 45.47         |
| Rho-Olf | OR4C12         | Olfactory receptor 4C12 (Olfacto)  | OR4CC       | 309         | 63.20              | 206.11          | 69.85    | 122.97        | 16.45                | 18.09           | 84.85    | 40.91         |
| Rho-Olf | OR4C13         | Olfactory receptor 4C13 (Olfacto)  | OR4CD       | 309         | 62.65              | 162.24          | 96.40    | 782.55        | 18.50                | 32.21           | 79.75    | 36.99         |
| Rho-Olf | OR4C15         | Olfactory receptor 4C15 (Olfacto)  | OR4CF       | 316         | 67.55              | 144.50          | 95.25    | 388.41        | 13.40                | 39.05           | 60.40    | 43.78         |
| Rho-Olf | OR4C16         | Olfactory receptor 4C16 (Olfacto)  | OR4CG       | 310         | 35.30              | 104.18          | 50.60    | 86.10         | 46.10                | 31.83           | 74.75    | 74.56         |
| Rho-Olf | OR4D1 OR4D3    | Olfactory receptor 4D1 (Olfactory) | OR4D1       | 310         | 72.45              | 113.10          | 93.85    | 973.12        | 13.80                | 37.09           | 61.50    | 58.26         |
| Rho-Olf | OR4D2          | Olfactory receptor 4D2 (B-lymph)   | OR4D2       | 307         | 61.30              | 302.29          | 72.35    | 231.51        | 17.70                | 24.03           | 95.80    | 71.94         |
| Rho-Olf | OR4D5          | Olfactory receptor 4D5 (Olfactory) | OR4D5       | 318         | 28.95              | 108.44          | 35.20    | 111.16        | 15.15                | 33.24           | 95.75    | 80.70         |
| Rho-Olf | OR4D6          | Olfactory receptor 4D6 (Olfactory) | OR4D6       | 314         | 9.45               | 122.85          | 24.65    | 93.05         | 57.05                | 48.79           | 78.15    | 307.06        |
| Rho-Olf | OR4D9          | Olfactory receptor 4D9 (Olfactory) | OR4D9       | 314         | 27.70              | 129.47          | 57.35    | 86.16         | 17.25                | 30.74           | 54.25    | 20.52         |
| Rho-Olf | OR4D10 OR4D10  | Olfactory receptor 4D10 (Olfacto)  | OR4DA       | 311         | 29.10              | 55.92           | 52.50    | 48.59         | 42.25                | 26.17           | 90.05    | 51.51         |
| Rho-Olf | OR4D11 OR4D11  | Olfactory receptor 4D11            | OR4DB       | 311         | 26.25              | 93.52           | 61.35    | 93.84         | 47.40                | 13.02           | 28.00    | 35.99         |
| Rho-Olf | OR4E1 OR4E1P   | Olfactory receptor 4E1 (Olfactory) | OR4E1       | 316         | 24.90              | 100.76          | 92.80    | 389.63        | 36.55                | 19.03           | 82.50    | 68.31         |
| Rho-Olf | OR4E2          | Olfactory receptor 4E2 (Olfactory) | OR4E2       | 313         | 28.50              | 57.79           | 51.10    | 56.02         | 13.25                | 24.79           | 5.40     | 67.96         |
| Rho-Olf | OR4F3; OR4F16; | Olfactory receptor 4F3/4F16/4F2    | OR4F3       | 312         | 19.65              | 50.01           | 39.00    | 59.80         | 39.65                | 37.33           | 50.05    | 31.45         |
| Rho-Olf | OR4F4          | Olfactory receptor 4F4 (HS14a-1-   | OR4F4       | 305         | 10.65              | 80.15           | 27.60    | 70.65         | 8.75                 | 75.71           | 45.05    | 31.34         |
| Rho-Olf | OR4F5          | Olfactory receptor 4F5             | OR4F5       | 305         | 23.45              | 59.54           | 46.75    | 70.30         | 19.00                | 30.37           | 12.25    | 35.43         |
| Rho-Olf | OR4F6 OR4F12   | Olfactory receptor 4F6 (Olfactory) | OR4F6       | 312         | 73.90              | 99.63           | 97.50    | 413.30        | 16.70                | 43.65           | 10.60    | 21.57         |
| Rho-Olf |                | Putative olfactory receptor GPCR   | OR4FL       | 273         | 44.30              | 116.95          | 94.50    | 634.97        | 32.50                | 35.35           | 70.55    | 40.69         |
| Rho-Olf | OR4K1          | Olfactory receptor 4K1 (Olfactory) | OR4K1       | 311         | 21.30              | 45.22           | 33.70    | 45.81         | 14.85                | 28.43           | 96.40    | 58.85         |
| Rho-Olf | OR4K2          | Olfactory receptor 4K2 (Olfactory) | OR4K2       | 314         | 24.50              | 179.18          | 55.10    | 105.62        | 9.45                 | 16.87           | 13.40    | 17.02         |
| Rho-Olf | OR4K3 OR4K3P   | Olfactory receptor 4K3 (Olfactory) | OR4K3       | 315         | 25.60              | 79.48           | 31.25    | 73.26         | 16.40                | 33.19           | 63.35    | 72.29         |
| Rho-Olf | OR4K5          | Olfactory receptor 4K5 (Olfactory) | OR4K5       | 323         | 46.15              | 107.44          | 58.20    | 75.70         | 56.85                | 25.16           | 96.70    | 67.96         |
| Rho-Olf | OR4K13         | Olfactory receptor 4K13 (Olfacto)  | OR4KD       | 304         | 30.40              | 71.58           | 46.05    | 67.37         | 23.15                | 23.73           | 91.00    | 47.59         |
| Rho-Olf | OR4K14         | Olfactory receptor 4K14 (Olfacto)  | OR4KE       | 310         | 44.75              | 90.11           | 95.65    | 426.24        | 25.10                | 26.02           | 91.00    | 63.03         |
| Rho-Olf | OR4K15         | Olfactory receptor 4K15 (Olfacto)  | OR4KF       | 348         | 27.05              | 137.92          | 78.15    | 167.93        | 6.45                 | 55.36           | 30.70    | 21.79         |
| Rho-Olf | OR4K17         | Olfactory receptor 4K17 (Olfacto)  | OR4KH       | 315         | 71.90              | 136.78          | 95.95    | 430.18        | 46.75                | 14.30           | 52.70    | 19.86         |
| Rho-Olf | OR4L1 OR4L2P   | Olfactory receptor 4L1 (Olfactory) | OR4L1       | 312         | 62.90              | 194.60          | 97.65    | 785.73        | 43.00                | 15.77           | 64.05    | 17.94         |
| Rho-Olf | OR4M1          | Olfactory receptor 4M1 (Olfactory) | OR4M1       | 313         | 13.15              | 65.51           | 28.15    | 53.63         | 17.30                | 48.07           | 47.40    | 32.61         |
| Rho-Olf | OR4M2          | Olfactory receptor 4M2 (Olfactory) | OR4M2       | 313         | 49.85              | 110.24          | 95.95    | 671.89        | 21.45                | 22.39           | 91.70    | 35.27         |

Table S1. Comprehensive Protein Expression Data for 826 GPCRs

| Family  | Gene_names     | Protein_names                                     | Target name | WT-aa-count | Nt_BRIL constructs |                 |          |               | ICL3_BRIL constructs |                 |          |               |
|---------|----------------|---------------------------------------------------|-------------|-------------|--------------------|-----------------|----------|---------------|----------------------|-----------------|----------|---------------|
|         |                |                                                   |             |             | surface(%)         | surface density | total(%) | total density | surface(%)           | surface density | total(%) | total density |
| Rho-Olf | OR4N2          | Olfactory receptor 4N2 (Olfactory receptor 4N2)   | OR4N2       | 307         | 49.35              | 63.48           | 92.40    | 584.73        | 49.35                | 63.48           | 92.40    | 584.73        |
| Rho-Olf | OR4N4          | Olfactory receptor 4N4 (Olfactory receptor 4N4)   | OR4N4       | 316         | 17.50              | 97.15           | 33.90    | 59.30         | 50.05                | 19.62           | 96.20    | 43.28         |
| Rho-Olf | OR4N5          | Olfactory receptor 4N5 (Olfactory receptor 4N5)   | OR4N5       | 308         | 39.00              | 48.55           | 91.35    | 131.95        | 22.65                | 15.56           | 62.30    | 25.45         |
| Rho-Olf | OR4P4 OR4P3P   | Olfactory receptor 4P4 (Olfactory receptor 4P4)   | OR4P4       | 312         | 59.95              | 99.52           | 94.20    | 327.80        | 16.55                | 14.88           | 4.50     | 16.10         |
| Rho-Olf | OR4Q2 OR4Q2P   | Olfactory receptor 4Q2 (Olfactory receptor 4Q2)   | OR4Q2       | 313         | 13.75              | 67.13           | 30.15    | 63.33         | 14.50                | 36.12           | 93.70    | 84.58         |
| Rho-Olf | OR4Q3 C14orf11 | Olfactory receptor 4Q3 (Olfactory receptor 4Q3)   | OR4Q3       | 313         | 56.10              | 119.96          | 96.35    | 518.72        | 27.70                | 29.73           | 61.00    | 29.95         |
| Rho-Olf | OR4S1          | Olfactory receptor 4S1 (Olfactory receptor 4S1)   | OR4S1       | 309         | 22.35              | 105.24          | 38.40    | 75.82         | 30.60                | 34.82           | 57.95    | 30.03         |
| Rho-Olf | OR4S2 OR4S2P   | Olfactory receptor 4S2 (Olfactory receptor 4S2)   | OR4S2       | 311         | 62.85              | 239.17          | 78.75    | 197.77        | 15.95                | 24.44           | 67.50    | 74.36         |
| Rho-Olf | OR4X1          | Olfactory receptor 4X1 (Olfactory receptor 4X1)   | OR4X1       | 305         | 45.45              | 71.90           | 96.15    | 387.55        | 8.15                 | 40.52           | 56.25    | 62.31         |
| Rho-Olf | OR4X2          | Olfactory receptor 4X2 (Olfactory receptor 4X2)   | OR4X2       | 303         | 59.05              | 157.63          | 65.90    | 144.33        | 11.45                | 17.75           | 55.70    | 39.17         |
| Rho-Olf | OR5A1 OR5A1P   | Olfactory receptor 5A1 (OST181)                   | OR5A1       | 315         | 66.60              | 124.51          | 97.25    | 768.19        | 40.30                | 83.51           | 86.80    | 127.18        |
| Rho-Olf | OR5A2          | Olfactory receptor 5A2 (Olfactory receptor 5A2)   | OR5A2       | 324         | 67.40              | 79.71           | 96.20    | 949.26        | 27.20                | 21.04           | 72.70    | 69.69         |
| Rho-Olf | OR5B2          | Olfactory receptor 5B2 (OST073)                   | OR5B2       | 309         | 37.20              | 124.72          | 91.85    | 346.94        | 28.60                | 31.76           | 36.40    | 19.60         |
| Rho-Olf | OR5B3 OR5B13   | Olfactory receptor 5B3 (Olfactory receptor 5B3)   | OR5B3       | 314         | 39.90              | 66.55           | 96.75    | 479.46        | 4.05                 | 38.85           | 83.60    | 26.78         |
| Rho-Olf | OR5B12 OR5B12C | Olfactory receptor 5B12 (Olfactory receptor 5B12) | OR5BC       | 314         | 34.50              | 62.74           | 92.45    | 754.39        | 33.45                | 16.90           | 77.10    | 42.79         |
| Rho-Olf | OR5B17 OR5B20  | Olfactory receptor 5B17 (Olfactory receptor 5B17) | OR5BH       | 314         | 44.05              | 99.50           | 56.70    | 90.62         | 18.10                | 18.73           | 58.15    | 43.41         |
| Rho-Olf | OR5B21         | Olfactory receptor 5B21                           | OR5BL       | 309         | 17.85              | 167.59          | 91.45    | 581.28        | 7.45                 | 21.33           | 19.25    | 27.15         |
| Rho-Olf | OR5C1 OR5C2P   | Olfactory receptor 5C1 (Olfactory receptor 5C1)   | OR5C1       | 320         | 35.65              | 159.40          | 95.75    | 895.73        | 33.00                | 25.45           | 79.55    | 44.79         |
| Rho-Olf | OR5D13         | Olfactory receptor 5D13 (Olfactory receptor 5D13) | OR5DD       | 314         | 30.35              | 113.84          | 89.10    | 481.51        | 19.75                | 21.73           | 28.90    | 17.87         |
| Rho-Olf | OR5D14         | Olfactory receptor 5D14 (Olfactory receptor 5D14) | OR5DE       | 314         | 65.80              | 136.77          | 97.95    | 576.19        | 40.15                | 24.55           | 91.85    | 60.67         |
| Rho-Olf | OR5D16         | Olfactory receptor 5D16 (Olfactory receptor 5D16) | OR5DG       | 328         | 16.05              | 100.50          | 88.85    | 370.21        | 57.05                | 33.40           | 93.05    | 391.78        |
| Rho-Olf | OR5D18         | Olfactory receptor 5D18 (Olfactory receptor 5D18) | OR5DI       | 313         | 45.70              | 56.48           | 94.95    | 705.39        | 28.45                | 20.11           | 59.90    | 18.16         |
| Rho-Olf | OR5F1          | Olfactory receptor 5F1 (Olfactory receptor 5F1)   | OR5F1       | 314         | 34.70              | 188.99          | 50.75    | 112.36        | 50.55                | 17.58           | 85.50    | 33.88         |
| Rho-Olf | OR5G3 OR5G3P   | Olfactory receptor 5G3 (Olfactory receptor 5G3)   | OR5G3       | 314         | 50.90              | 102.60          | 61.45    | 72.30         | 53.85                | 16.14           | 90.05    | 38.55         |
| Rho-Olf | OR5H1          | Olfactory receptor 5H1 (HTPCRX1)                  | OR5H1       | 313         | 18.55              | 82.29           | 40.05    | 64.57         | 36.15                | 29.76           | 44.65    | 30.11         |
| Rho-Olf | OR5H2          | Olfactory receptor 5H2 (Olfactory receptor 5H2)   | OR5H2       | 314         | 26.20              | 93.16           | 40.65    | 79.66         | 34.10                | 34.63           | 95.80    | 133.14        |
| Rho-Olf | OR5H6          | Olfactory receptor 5H6 (Olfactory receptor 5H6)   | OR5H6       | 325         | 33.60              | 105.98          | 93.40    | 306.68        | 31.55                | 31.83           | 86.90    | 89.85         |
| Rho-Olf | OR5I1 OLF1     | Olfactory receptor 5I1 (Olfactory receptor 5I1)   | OR5I1       | 314         | 30.40              | 103.13          | 55.60    | 88.22         | 10.00                | 27.83           | 81.20    | 37.77         |
| Rho-Olf | OR5J2          | Olfactory receptor 5J2 (Olfactory receptor 5J2)   | OR5J2       | 312         | 33.45              | 57.99           | 74.05    | 147.95        | 22.75                | 49.42           | 79.15    | 38.17         |
| Rho-Olf | OR5K1          | Olfactory receptor 5K1 (HTPCRX1)                  | OR5K1       | 308         | 55.65              | 206.58          | 59.80    | 139.85        | 19.80                | 43.50           | 71.10    | 184.24        |
| Rho-Olf | OR5K2          | Olfactory receptor 5K2 (Olfactory receptor 5K2)   | OR5K2       | 316         | 60.10              | 64.05           | 96.90    | 537.33        | 25.85                | 22.28           | 74.65    | 48.75         |
| Rho-Olf | OR5K3          | Olfactory receptor 5K3                            | OR5K3       | 321         | 14.15              | 68.36           | 71.80    | 625.84        | 9.55                 | 48.93           | 49.40    | 42.26         |
| Rho-Olf | OR5K4          | Olfactory receptor 5K4                            | OR5K4       | 321         | 23.65              | 149.31          | 36.10    | 99.53         | 29.25                | 19.31           | 50.05    | 17.81         |
| Rho-Olf | OR5L1          | Olfactory receptor 5L1 (OST262)                   | OR5L1       | 311         | 42.20              | 288.37          | 97.10    | 896.42        | 43.55                | 20.27           | 80.30    | 40.89         |
| Rho-Olf | OR5L2          | Olfactory receptor 5L2 (HTPCRX1)                  | OR5L2       | 311         | 44.90              | 152.30          | 94.90    | 676.72        | 45.90                | 39.30           | 90.05    | 206.82        |
| Rho-Olf | OR5M1          | Olfactory receptor 5M1 (OST050)                   | OR5M1       | 315         | 32.80              | 79.29           | 89.60    | 421.25        | 11.60                | 20.92           | 48.30    | 19.73         |
| Rho-Olf | OR5M3          | Olfactory receptor 5M3 (Olfactory receptor 5M3)   | OR5M3       | 307         | 63.15              | 72.59           | 97.10    | 677.85        | 28.70                | 27.10           | 82.05    | 42.73         |
| Rho-Olf | OR5M8          | Olfactory receptor 5M8 (Olfactory receptor 5M8)   | OR5M8       | 311         | 59.15              | 84.90           | 97.55    | 547.01        | 34.90                | 26.17           | 83.75    | 47.49         |
| Rho-Olf | OR5M9          | Olfactory receptor 5M9 (Olfactory receptor 5M9)   | OR5M9       | 310         | 33.35              | 46.44           | 90.75    | 326.77        | 23.30                | 17.10           | 78.75    | 53.79         |
| Rho-Olf | OR5M10         | Olfactory receptor 5M10 (Olfactory receptor 5M10) | OR5MA       | 315         | 24.10              | 162.17          | 41.15    | 93.45         | 11.15                | 37.93           | 61.25    | 55.03         |



Table S1. Comprehensive Protein Expression Data for 826 GPCRs

| Family  | Gene_names    | Protein_names                     | Target name | WT-aa-count | Nt_BRIL constructs |                 |          |               | ICL3_BRIL constructs |                 |          |               |
|---------|---------------|-----------------------------------|-------------|-------------|--------------------|-----------------|----------|---------------|----------------------|-----------------|----------|---------------|
|         |               |                                   |             |             | surface(%)         | surface density | total(%) | total density | surface(%)           | surface density | total(%) | total density |
| Rho-Olf | OR5M11        | Olfactory receptor 5M11           | OR5MB       | 305         | 56.90              | 76.82           | 97.25    | 522.79        | 10.60                | 22.67           | 42.70    | 43.69         |
| Rho-Olf | OR5P2         | Olfactory receptor 5P2 (Olfactory | OR5P2       | 322         | 35.40              | 103.21          | 96.25    | 600.37        | 7.30                 | 44.03           | 54.00    | 34.23         |
| Rho-Olf | OR5P3         | Olfactory receptor 5P3 (Olfactory | OR5P3       | 311         | 53.30              | 45.66           | 96.45    | 503.56        | 11.65                | 47.18           | 84.05    | 72.10         |
| Rho-Olf | OR5R1 OR5R1P  | Olfactory receptor 5R1 (Olfactory | OR5R1       | 324         | 28.50              | 186.98          | 95.60    | 653.12        | 8.75                 | 38.84           | 74.95    | 57.05         |
| Rho-Olf | OR5T1 OR5T1P  | Olfactory receptor 5T1 (Olfactory | OR5T1       | 326         | 47.90              | 67.88           | 95.75    | 533.08        | 15.35                | 26.20           | 56.25    | 18.64         |
| Rho-Olf | OR5T2         | Olfactory receptor 5T2 (Olfactory | OR5T2       | 359         | 45.60              | 73.93           | 95.70    | 670.31        | 21.00                | 14.55           | 83.10    | 32.38         |
| Rho-Olf | OR5T3         | Olfactory receptor 5T3 (Olfactory | OR5T3       | 340         | 31.90              | 52.10           | 84.40    | 136.46        | 6.50                 | 23.63           | 72.40    | 21.36         |
| Rho-Olf | OR5V1         | Olfactory receptor 5V1 (Hs6M1-2   | OR5V1       | 321         | 21.30              | 43.09           | 75.85    | 126.49        | 58.45                | 29.01           | 91.75    | 97.98         |
| Rho-Olf | OR5W2 OR5W2   | Olfactory receptor 5W2 (Olfactory | OR5W2       | 310         | 33.65              | 51.81           | 88.25    | 421.46        | 8.65                 | 33.33           | 71.10    | 25.77         |
| Rho-Olf | OR6A2 OR6A1 C | Olfactory receptor 6A2 (Olfactory | OR6A2       | 327         | 44.65              | 110.44          | 93.60    | 631.20        | 34.55                | 19.32           | 87.75    | 65.68         |
| Rho-Olf | OR6B1         | Olfactory receptor 6B1 (Olfactory | OR6B1       | 311         | 18.95              | 195.19          | 35.35    | 77.05         | 42.25                | 34.53           | 88.10    | 55.08         |
| Rho-Olf | OR6B2 OR6B2P  | Olfactory receptor 6B2 (Olfactory | OR6B2       | 312         | 42.55              | 140.64          | 90.40    | 439.42        | 17.65                | 18.54           | 83.50    | 24.86         |
| Rho-Olf | OR6B3 OR6B3P  | Olfactory receptor 6B3 (Olfactory | OR6B3       | 331         | 33.10              | 61.39           | 87.85    | 267.64        | 19.70                | 24.67           | 61.15    | 23.13         |
| Rho-Olf | OR6C1         | Olfactory receptor 6C1 (OST267)   | OR6C1       | 312         | 50.20              | 73.29           | 95.90    | 345.48        | 10.25                | 36.80           | 33.25    | 24.37         |
| Rho-Olf | OR6C2         | Olfactory receptor 6C2 (HSA3)     | OR6C2       | 312         | 28.85              | 71.77           | 53.80    | 53.67         | 10.00                | 18.70           | 69.45    | 48.22         |
| Rho-Olf | OR6C3         | Olfactory receptor 6C3 (HSA8)     | OR6C3       | 311         | 48.15              | 161.70          | 94.25    | 463.55        | 39.10                | 11.83           | 52.75    | 13.81         |
| Rho-Olf | OR6C4         | Olfactory receptor 6C4 (Olfactory | OR6C4       | 309         | 43.70              | 66.02           | 91.40    | 217.88        | 24.90                | 31.30           | 89.20    | 52.79         |
| Rho-Olf | OR6C6         | Olfactory receptor 6C6            | OR6C6       | 314         | 9.50               | 107.60          | 25.30    | 83.59         | 14.90                | 30.13           | 91.00    | 39.32         |
| Rho-Olf | OR6F1         | Olfactory receptor 6F1 (Olfactory | OR6F1       | 308         | 49.35              | 251.12          | 60.20    | 166.79        | 15.10                | 18.81           | 58.10    | 47.92         |
| Rho-Olf | OR6J1 OR6J2   | Olfactory receptor 6J1 (Olfactory | OR6J1       | 347         | 26.75              | 67.29           | 57.55    | 58.67         | 16.65                | 26.52           | 72.05    | 91.09         |
| Rho-Olf | OR6K2         | Olfactory receptor 6K2 (Olfactory | OR6K2       | 324         | 33.45              | 70.43           | 47.95    | 76.23         | 37.95                | 25.52           | 95.20    | 96.38         |
| Rho-Olf | OR6K3         | Olfactory receptor 6K3 (Olfactory | OR6K3       | 331         | 52.30              | 74.39           | 97.35    | 488.63        | 5.60                 | 27.47           | 82.85    | 36.30         |
| Rho-Olf | OR6K6         | Olfactory receptor 6K6 (Olfactory | OR6K6       | 343         | 27.85              | 127.74          | 47.20    | 86.37         | 23.55                | 19.47           | 46.65    | 19.10         |
| Rho-Olf | OR6M1         | Olfactory receptor 6M1 (Olfactory | OR6M1       | 313         | 21.30              | 43.09           | 75.85    | 126.49        | 33.85                | 20.68           | 83.05    | 34.80         |
| Rho-Olf | OR6N1         | Olfactory receptor 6N1            | OR6N1       | 312         | 75.10              | 122.65          | 97.45    | 888.91        | 5.90                 | 28.86           | 14.60    | 27.78         |
| Rho-Olf | OR6N2         | Olfactory receptor 6N2 (Olfactory | OR6N2       | 317         | 55.05              | 47.96           | 95.75    | 193.97        | 48.00                | 24.50           | 59.15    | 25.61         |
| Rho-Olf | OR6P1         | Olfactory receptor 6P1 (Olfactory | OR6P1       | 317         | 51.30              | 174.86          | 68.95    | 131.72        | 22.30                | 35.34           | 61.75    | 29.35         |
| Rho-Olf | OR6Q1         | Olfactory receptor 6Q1 (Olfactory | OR6Q1       | 317         | 57.35              | 95.44           | 66.65    | 94.33         | 28.45                | 21.71           | 91.40    | 40.88         |
| Rho-Olf | OR6S1         | Olfactory receptor 6S1 (Olfactory | OR6S1       | 331         | 65.20              | 80.90           | 97.45    | 463.00        | 23.65                | 47.49           | 60.05    | 50.60         |
| Rho-Olf | OR6T1         | Olfactory receptor 6T1 (Olfactory | OR6T1       | 323         | 41.65              | 81.12           | 95.50    | 456.60        | 34.50                | 24.46           | 89.65    | 55.73         |
| Rho-Olf | OR6V1         | Olfactory receptor 6V1 (Olfactory | OR6V1       | 313         | 19.40              | 97.96           | 42.90    | 85.82         | 11.90                | 18.64           | 75.50    | 22.68         |
| Rho-Olf | OR6X1         | Olfactory receptor 6X1 (Olfactory | OR6X1       | 312         | 33.55              | 61.92           | 56.95    | 75.26         | 24.50                | 23.39           | 38.20    | 19.37         |
| Rho-Olf | OR6Y1 OR6Y2   | Olfactory receptor 6Y1 (Olfactory | OR6Y1       | 325         | 40.85              | 163.88          | 95.95    | 548.60        | 40.50                | 25.48           | 91.75    | 43.96         |
| Rho-Olf | OR7A2P OR7A2  | Putative olfactory receptor 7A2 ( | OR7A2       | 310         | 65.90              | 67.18           | 96.70    | 969.74        | 29.55                | 21.26           | 75.20    | 73.35         |
| Rho-Olf | OR7A5         | Olfactory receptor 7A5 (Olfactory | OR7A5       | 319         | 24.50              | 218.91          | 90.45    | 920.38        | 21.00                | 25.65           | 58.85    | 56.64         |
| Rho-Olf | OR7A10        | Olfactory receptor 7A10 (OST027   | OR7AA       | 309         | 48.80              | 96.67           | 96.50    | 590.19        | 14.60                | 31.80           | 82.80    | 69.23         |
| Rho-Olf | OR7A17        | Olfactory receptor 7A17           | OR7AH       | 309         | 31.20              | 150.94          | 92.55    | 365.71        | 18.35                | 32.43           | 18.65    | 89.98         |
| Rho-Olf | OR7C1 OR7C4   | Olfactory receptor 7C1 (Olfactory | OR7C1       | 320         | 16.65              | 92.67           | 35.75    | 70.23         | 13.25                | 41.57           | 45.50    | 26.09         |
| Rho-Olf | OR7C2 OR7C3   | Olfactory receptor 7C2 (Olfactory | OR7C2       | 319         | 23.60              | 146.87          | 41.65    | 120.37        | 12.60                | 22.29           | 69.35    | 67.89         |
| Rho-Olf | OR7D2         | Olfactory receptor 7D2 (HTPCRH    | OR7D2       | 312         | 45.25              | 160.46          | 66.05    | 130.69        | 20.45                | 30.31           | 81.35    | 37.94         |

Table S1. Comprehensive Protein Expression Data for 826 GPCRs

| Family  | Gene_names   | Protein_names                       | Target name | WT-aa-count | Nt_BRIL constructs |                 |          |               | ICL3_BRIL constructs |                 |          |               |
|---------|--------------|-------------------------------------|-------------|-------------|--------------------|-----------------|----------|---------------|----------------------|-----------------|----------|---------------|
|         |              |                                     |             |             | surface(%)         | surface density | total(%) | total density | surface(%)           | surface density | total(%) | total density |
| Rho-Olf | OR7D4 OR7D4P | Olfactory receptor 7D4 (OR19-B)     | OR7D4       | 312         | 25.35              | 155.98          | 78.15    | 359.27        | 37.90                | 16.86           | 76.85    | 34.65         |
| Rho-Olf | OR7G1 OR7G1P | Olfactory receptor 7G1 (Olfactory)  | OR7G1       | 311         | 15.35              | 60.85           | 26.85    | 54.24         | 24.40                | 23.20           | 61.85    | 29.32         |
| Rho-Olf | OR7G2        | Olfactory receptor 7G2 (OST260)     | OR7G2       | 324         | 31.85              | 65.76           | 52.95    | 85.34         | 35.35                | 24.83           | 95.60    | 82.88         |
| Rho-Olf | OR7G3        | Olfactory receptor 7G3 (OST085)     | OR7G3       | 312         | 52.10              | 171.17          | 89.25    | 238.04        | 29.40                | 19.50           | 4.10     | 24.83         |
| Rho-Olf | OR8A1        | Olfactory receptor 8A1 (OST025)     | OR8A1       | 326         | 52.10              | 110.54          | 92.70    | 248.19        | 26.00                | 32.37           | 72.05    | 43.66         |
| Rho-Olf | OR8B2        | Olfactory receptor 8B2 (Olfactory)  | OR8B2       | 313         | 45.20              | 66.10           | 88.70    | 137.45        | 38.30                | 25.57           | 72.15    | 60.59         |
| Rho-Olf | OR8B3        | Olfactory receptor 8B3 (Olfactory)  | OR8B3       | 313         | 68.75              | 129.71          | 98.15    | 906.35        | 34.65                | 63.24           | 87.65    | 92.58         |
| Rho-Olf | OR8B4 OR8B4P | Olfactory receptor 8B4 (Olfactory)  | OR8B4       | 309         | 52.70              | 132.00          | 94.95    | 290.52        | 12.50                | 23.20           | 75.00    | 66.12         |
| Rho-Olf | OR8B8        | Olfactory receptor 8B8 (Olfactory)  | OR8B8       | 311         | 45.75              | 82.30           | 93.55    | 380.91        | 34.70                | 32.96           | 87.95    | 85.89         |
| Rho-Olf | OR8B12       | Olfactory receptor 8B12 (Olfactory) | OR8BC       | 310         | 66.50              | 87.02           | 96.90    | 740.40        | 41.90                | 28.96           | 84.65    | 72.79         |
| Rho-Olf | OR8D1 OR8D3  | Olfactory receptor 8D1 (OST004)     | OR8D1       | 308         | 51.20              | 107.45          | 66.90    | 72.05         | 57.45                | 33.70           | 96.90    | 169.79        |
| Rho-Olf | OR8D2        | Olfactory receptor 8D2 (Olfactory)  | OR8D2       | 311         | 26.45              | 135.37          | 91.40    | 888.74        | 56.10                | 24.66           | 89.25    | 77.64         |
| Rho-Olf | OR8D4        | Olfactory receptor 8D4 (Olfactory)  | OR8D4       | 314         | 52.60              | 114.92          | 97.30    | 581.10        | 36.05                | 20.40           | 79.10    | 94.03         |
| Rho-Olf | OR8G1 OR8G1P | Olfactory receptor 8G1 (Olfactory)  | OR8G1       | 311         | 61.95              | 126.13          | 96.50    | 460.34        | 28.05                | 35.15           | 61.65    | 31.74         |
| Rho-Olf | OR8G2 OR8G2P | Olfactory receptor 8G2 (Olfactory)  | OR8G2       | 310         | 21.30              | 43.09           | 75.85    | 126.49        | 20.40                | 68.43           | 94.70    | 125.71        |
| Rho-Olf | OR8G5 OR8G5P | Olfactory receptor 8G5 (Olfactory)  | OR8G5       | 311         | 33.65              | 141.68          | 49.05    | 111.42        | 24.15                | 34.09           | 73.90    | 56.00         |
| Rho-Olf | OR8H1        | Olfactory receptor 8H1 (Olfactory)  | OR8H1       | 311         | 12.80              | 88.28           | 22.20    | 77.75         | 19.85                | 35.17           | 93.60    | 285.55        |
| Rho-Olf | OR8H2        | Olfactory receptor 8H2 (Olfactory)  | OR8H2       | 312         | 21.90              | 41.75           | 37.75    | 55.34         | 13.25                | 35.51           | 92.10    | 172.80        |
| Rho-Olf | OR8H3        | Olfactory receptor 8H3 (Olfactory)  | OR8H3       | 312         | 9.30               | 76.40           | 72.40    | 218.67        | 48.80                | 23.67           | 78.85    | 210.14        |
| Rho-Olf | OR8I2        | Olfactory receptor 8I2 (Olfactory)  | OR8I2       | 310         | 23.55              | 114.50          | 34.15    | 125.43        | 16.65                | 18.03           | 86.80    | 28.99         |
| Rho-Olf | OR8J1        | Olfactory receptor 8J1 (Olfactory)  | OR8J1       | 316         | 45.10              | 56.28           | 94.20    | 159.89        | 59.65                | 45.78           | 94.10    | 201.73        |
| Rho-Olf | OR8J2 OR8J2P | Olfactory receptor 8J2              | OR8J2       | 315         | 23.50              | 102.56          | 36.35    | 87.74         | 20.40                | 48.72           | 96.85    | 112.58        |
| Rho-Olf | OR8J3        | Olfactory receptor 8J3 (Olfactory)  | OR8J3       | 315         | 75.50              | 146.12          | 97.25    | 984.62        | 46.95                | 62.79           | 91.90    | 159.40        |
| Rho-Olf | OR8K1        | Olfactory receptor 8K1 (Olfactory)  | OR8K1       | 319         | 64.75              | 227.07          | 95.55    | 722.62        | 21.55                | 46.91           | 91.90    | 85.04         |
| Rho-Olf | OR8K3        | Olfactory receptor 8K3 (Olfactory)  | OR8K3       | 312         | 25.25              | 91.43           | 91.45    | 810.45        | 55.50                | 19.42           | 91.20    | 110.08        |
| Rho-Olf | OR8K5        | Olfactory receptor 8K5 (Olfactory)  | OR8K5       | 307         | 17.00              | 177.29          | 39.85    | 113.56        | 20.70                | 23.78           | 73.90    | 26.50         |
| Rho-Olf | OR8S1        | Olfactory receptor 8S1              | OR8S1       | 359         | 55.60              | 74.14           | 89.95    | 183.95        | 40.70                | 27.58           | 84.65    | 57.63         |
| Rho-Olf | OR8U1        | Olfactory receptor 8U1              | OR8U1       | 309         | 57.30              | 270.35          | 91.35    | 517.63        | 15.50                | 35.68           | 93.50    | 75.02         |
| Rho-Olf | OR8U8        | Olfactory receptor 8U8              | OR8U8       | 319         | 17.00              | 165.68          | 33.20    | 94.14         | 18.40                | 21.07           | 57.70    | 23.40         |
| Rho-Olf | OR8U9        | Olfactory receptor 8U9              | OR8U9       | 309         | 24.00              | 133.78          | 50.40    | 172.89        | 46.10                | 24.63           | 96.10    | 71.76         |
| Rho-Olf | OR9A1P OR9A1 | Putative olfactory receptor 9A1 (   | OR9A1       | 263         | 31.95              | 168.98          | 51.75    | 100.23        | 39.20                | 15.62           | 85.35    | 104.56        |
| Rho-Olf | OR9A2        | Olfactory receptor 9A2 (Olfactory)  | OR9A2       | 310         | 62.85              | 175.71          | 93.35    | 236.74        | 33.20                | 23.63           | 84.05    | 38.47         |
| Rho-Olf | OR9A4        | Olfactory receptor 9A4 (Olfactory)  | OR9A4       | 314         | 30.05              | 101.68          | 41.50    | 109.48        | 8.50                 | 87.08           | 73.30    | 47.31         |
| Rho-Olf | OR9G1 OR9G5  | Olfactory receptor 9G1 (Olfactory)  | OR9G1       | 305         | 32.60              | 148.30          | 91.90    | 494.88        | 22.50                | 19.90           | 43.70    | 27.67         |
| Rho-Olf | OR9G4        | Olfactory receptor 9G4 (Olfactory)  | OR9G4       | 327         | 57.55              | 166.06          | 92.25    | 228.77        | 17.20                | 32.51           | 39.80    | 21.22         |
| Rho-Olf | OR9G9        | Olfactory receptor 9G9              | OR9G9       | 305         | 25.45              | 66.71           | 50.90    | 78.00         | 4.70                 | 58.18           | 6.00     | 16.70         |
| Rho-Olf | OR9I1        | Olfactory receptor 9I1 (Olfactory)  | OR9I1       | 314         | 38.60              | 65.67           | 46.05    | 47.62         | 34.60                | 16.45           | 71.75    | 21.29         |
| Rho-Olf | OR9K2        | Olfactory receptor 9K2 (Olfactory)  | OR9K2       | 335         | 60.20              | 129.41          | 91.15    | 205.03        | 45.55                | 44.90           | 87.25    | 117.56        |
| Rho-Olf | OR9Q1        | Olfactory receptor 9Q1              | OR9Q1       | 310         | 54.85              | 114.39          | 94.70    | 969.12        | 30.80                | 20.43           | 50.00    | 17.10         |
| Rho-Olf | OR9Q2 OR9Q2P | Olfactory receptor 9Q2              | OR9Q2       | 314         | 26.70              | 76.31           | 57.90    | 72.94         | 15.25                | 21.70           | 24.25    | 26.94         |

Table S1. Comprehensive Protein Expression Data for 826 GPCRs

| Family    | Gene_names     | Protein_names                      | Target name | WT-aa-count | Nt_BRIL constructs |                 |          |               | ICL3_BRIL constructs |                 |          |               |
|-----------|----------------|------------------------------------|-------------|-------------|--------------------|-----------------|----------|---------------|----------------------|-----------------|----------|---------------|
|           |                |                                    |             |             | surface(%)         | surface density | total(%) | total density | surface(%)           | surface density | total(%) | total density |
| Rho-Olf   | YI035_HUMAN    | Putative olfactory receptor ENSP   | YI035       | 320         | 33.55              | 170.35          | 46.50    | 90.16         | 29.80                | 31.17           | 69.85    | 214.36        |
| Secretin  | CALCR          | Calcitonin receptor (CT-R)         | CALCR       | 490         | 48.00              | 33.83           | 69.75    | 71.75         | 44.60                | 56.69           | 90.90    | 272.63        |
| Secretin  | CALCRL CGRPR   | Calcitonin gene-related peptide t  | CALRL       | 461         | 51.70              | 38.85           | 83.95    | 109.05        | 47.30                | 65.12           | 86.35    | 285.92        |
| Secretin  | CRHR1 CRFR CR  | Corticotropin-releasing factor re  | CRFR1       | 444         | 66.15              | 26.22           | 63.55    | 41.54         | 72.75                | 64.23           | 88.50    | 379.74        |
| Secretin  | CRHR2 CRF2R CF | Corticotropin-releasing factor re  | CRFR2       | 411         | 64.20              | 37.67           | 71.30    | 72.97         | 74.40                | 63.34           | 91.15    | 366.92        |
| Secretin  | GHRHR          | Growth hormone-releasing horm      | GHRHR       | 423         | 46.55              | 28.68           | 60.10    | 50.66         | 92.95                | 87.37           | 93.50    | 240.85        |
| Secretin  | GIPR           | Gastric inhibitory polypeptide re  | GIPR        | 466         | 62.85              | 52.74           | 67.05    | 73.81         | 69.15                | 91.77           | 93.65    | 552.05        |
| Secretin  | GLP1R          | Glucagon-like peptide 1 receptor   | GLP1R       | 463         | 48.15              | 191.47          | 96.05    | 526.39        | 61.90                | 36.12           | 94.70    | 390.21        |
| Secretin  | GLP2R          | Glucagon-like peptide 2 receptor   | GLP2R       | 553         | 83.45              | 56.86           | 98.05    | 289.13        | 79.95                | 55.91           | 96.50    | 454.73        |
| Secretin  | GCGR           | Glucagon receptor (GL-R)           | GLR         | 477         | 61.70              | 129.20          | 97.95    | 812.95        | 76.45                | 87.20           | 92.95    | 364.48        |
| Secretin  | GPR157         | Probable G-protein coupled rece    | GP157       | 335         | 49.00              | 193.13          | 96.40    | 403.56        | 83.50                | 214.09          | 98.00    | 1,008.88      |
| Secretin  | ADCYAP1R1      | Pituitary adenylate cyclase-activa | PACR        | 468         | 43.55              | 94.25           | 86.65    | 210.96        | 68.80                | 33.53           | 86.75    | 170.08        |
| Secretin  | PTH1R PTHR PT  | Parathyroid hormone/parathyroi     | PTH1R       | 593         | 68.25              | 78.20           | 96.05    | 464.32        | 76.65                | 47.19           | 93.35    | 312.46        |
| Secretin  | PTH2R PTHR2    | Parathyroid hormone 2 receptor     | PTH2R       | 550         | 37.95              | 124.17          | 71.55    | 168.17        | 52.25                | 23.21           | 94.70    | 183.50        |
| Secretin  | SCTR           | Secretin receptor (SCT-R)          | SCTR        | 440         | 82.95              | 109.59          | 93.25    | 670.27        | 86.05                | 55.39           | 84.75    | 538.89        |
| Secretin  | VIPR1          | Vasoactive intestinal polypeptide  | VIPR1       | 457         | 76.10              | 96.22           | 94.40    | 189.40        | 85.20                | 65.81           | 93.30    | 376.71        |
| Secretin  | VIPR2 VIP2R    | Vasoactive intestinal polypeptide  | VIPR2       | 438         | 77.95              | 481.97          | 69.85    | 344.24        | 89.50                | 88.17           | 91.70    | 508.94        |
| Glutamate | CASR GPCR2A P  | Extracellular calcium-sensing rec  | CASR        | 1078        | 95.55              | 300.04          | 83.20    | 368.95        | 90.35                | 76.05           | 91.80    | 421.15        |
| Glutamate | GABBR1 GPRC3A  | Gamma-aminobutyric acid type I     | GABR1       | 961         | 15.65              | 180.84          | 80.50    | 1,081.00      | 16.10                | 25.00           | 94.20    | 177.81        |
| Glutamate | GABBR2 GPR51   | Gamma-aminobutyric acid type I     | GABR2       | 941         | 50.85              | 95.04           | 90.55    | 588.89        | 22.05                | 27.27           | 92.45    | 1,421.65      |
| Glutamate | GPR156 GABAB1  | Probable G-protein coupled rece    | GP156       | 814         | 51.65              | 73.64           | 86.35    | 209.32        | 71.55                | 58.40           | 92.40    | 547.79        |
| Glutamate | GPR158 KIAA111 | Probable G-protein coupled rece    | GP158       | 1215        | 95.20              | 338.52          | 74.10    | 200.29        | 90.20                | 97.12           | 84.05    | 308.92        |
| Glutamate | GPR179 GPR158  | Probable G-protein coupled rece    | GP179       | 2367        | 42.55              | 131.10          | 94.40    | 836.43        | 36.80                | 26.48           | 92.60    | 1,063.37      |
| Glutamate | GPRC5B RAIG2   | G-protein coupled receptor famil   | GPC5B       | 403         | 94.65              | 230.89          | 89.00    | 451.29        | 13.35                | 54.31           | 80.60    | 112.08        |
| Glutamate | GPRC5C RAIG3 F | G-protein coupled receptor famil   | GPC5C       | 441         | 96.40              | 216.00          | 83.60    | 303.72        | 51.45                | 34.82           | 96.60    | 976.30        |
| Glutamate | GPRC5D         | G-protein coupled receptor famil   | GPC5D       | 345         | 96.35              | 401.57          | 86.05    | 522.25        | 89.85                | 74.67           | 88.45    | 422.86        |
| Glutamate | GPRC6A         | G-protein coupled receptor famil   | GPC6A       | 926         | 30.50              | 50.82           | 70.00    | 254.77        | 23.70                | 42.39           | 91.45    | 786.95        |
| Glutamate | GRM1 GPRC1A    | Metabotropic glutamate recepto     | GRM1        | 1194        | 54.40              | 84.15           | 91.85    | 444.45        | 54.15                | 46.04           | 89.80    | 677.67        |
| Glutamate | GRM2 GPRC1B M  | Metabotropic glutamate recepto     | GRM2        | 872         | 92.30              | 100.26          | 85.40    | 313.66        | 43.70                | 38.69           | 91.60    | 1,404.69      |
| Glutamate | GRM3 GPRC1C M  | Metabotropic glutamate recepto     | GRM3        | 879         | 95.90              | 118.52          | 93.95    | 400.44        | 67.35                | 37.71           | 92.50    | 1,072.46      |
| Glutamate | GRM4 GPRC1D M  | Metabotropic glutamate recepto     | GRM4        | 912         | 36.05              | 166.09          | 92.05    | 769.16        | 40.80                | 63.93           | 88.90    | 1,478.02      |
| Glutamate | GRM5 GPRC1E M  | Metabotropic glutamate recepto     | GRM5        | 1212        | 43.15              | 72.23           | 75.65    | 427.15        | 47.20                | 49.80           | 89.90    | 465.23        |
| Glutamate | GRM6 GPRC1F M  | Metabotropic glutamate recepto     | GRM6        | 877         | 37.00              | 110.55          | 84.90    | 673.38        | 41.95                | 52.22           | 92.25    | 1,146.17      |
| Glutamate | GRM7 GPRC1G M  | Metabotropic glutamate recepto     | GRM7        | 915         | 21.10              | 33.63           | 1.25     | 115.24        | 23.55                | 84.83           | 92.00    | 722.59        |
| Glutamate | GRM8 GPRC1H M  | Metabotropic glutamate recepto     | GRM8        | 908         | 40.85              | 90.56           | 83.60    | 730.17        | 17.60                | 97.68           | 92.60    | 977.58        |
| Glutamate | GPRC5A GPCR5A  | Retinoic acid-induced protein 3 (  | RAI3        | 357         | 93.95              | 237.05          | 84.40    | 347.20        | 43.80                | 40.84           | 92.95    | 511.91        |
| Glutamate | TAS1R1 GPR70 T | Taste receptor type 1 member 1     | TS1R1       | 841         | 43.45              | 92.31           | 74.20    | 711.48        | 33.20                | 80.27           | 59.55    | 228.06        |
| Glutamate | TAS1R2 GPR71 T | Taste receptor type 1 member 2     | TS1R2       | 839         | 93.25              | 161.27          | 75.30    | 274.74        | 41.50                | 68.40           | 81.80    | 619.46        |

Table S1. Comprehensive Protein Expression Data for 826 GPCRs

| Family        | Gene_names      | Protein_names                       | Target name | WT-aa-count | Nt_BRIL constructs |                 |              |               | ICL3_BRIL constructs |                 |              |                 |
|---------------|-----------------|-------------------------------------|-------------|-------------|--------------------|-----------------|--------------|---------------|----------------------|-----------------|--------------|-----------------|
|               |                 |                                     |             |             | surface(%)         | surface density | total(%)     | total density | surface(%)           | surface density | total(%)     | total density   |
| Glutamate     | TAS1R3 T1R3 TR  | Taste receptor type 1 member 3      | TS1R3       | 852         | 65.05              | 145.52          | 76.65        | 233.04        | 54.80                | 865.22          | 62.55        | 1,199.49        |
| Fz/Tas        | FZD1            | Frizzled-1 (Fz-1) (hFz1) (FzE1)     | FZD1        | 647         | 96.05              | 217.67          | 93.65        | 323.06        | 40.90                | 119.24          | 68.40        | 337.68          |
| Fz/Tas        | FZD10           | Frizzled-10 (Fz-10) (hFz10) (FzE7)  | FZD10       | 581         | 77.50              | 105.19          | 76.20        | 331.84        | 74.20                | 69.38           | 86.25        | 512.30          |
| Fz/Tas        | FZD2            | Frizzled-2 (Fz-2) (hFz2) (FzE2)     | FZD2        | 565         | 72.40              | 75.05           | 91.55        | 301.21        | 44.70                | 100.57          | 82.35        | 446.54          |
| Fz/Tas        | FZD3            | Frizzled-3 (Fz-3) (hFz3)            | FZD3        | 666         | 85.50              | 59.60           | 91.40        | 538.70        | 44.90                | 39.12           | 65.70        | 201.69          |
| Fz/Tas        | FZD4            | Frizzled-4 (Fz-4) (hFz4) (FzE4) (CD | FZD4        | 537         | 91.75              | 107.72          | 79.50        | 535.99        | 80.85                | 64.73           | 77.05        | 352.90          |
| Fz/Tas        | FZD5 C2orf31    | Frizzled-5 (Fz-5) (hFz5) (FzE5)     | FZD5        | 585         | 96.50              | 239.65          | 88.65        | 268.41        | 61.60                | 74.53           | 90.05        | 466.02          |
| Fz/Tas        | FZD6            | Frizzled-6 (Fz-6) (hFz6)            | FZD6        | 706         | 71.55              | 64.56           | 28.40        | 112.08        | 96.45                | 257.95          | 85.75        | 537.51          |
| Fz/Tas        | FZD7            | Frizzled-7 (Fz-7) (hFz7) (FzE3)     | FZD7        | 574         | 53.75              | 97.53           | 98.45        | 588.22        | 65.05                | 100.64          | 83.45        | 296.89          |
| Fz/Tas        | FZD8            | Frizzled-8 (Fz-8) (hFz8)            | FZD8        | 694         | 86.35              | 77.09           | 69.05        | 598.51        | 67.65                | 98.99           | 66.60        | 322.73          |
| Fz/Tas        | FZD9 FZD3       | Frizzled-9 (Fz-9) (hFz9) (FzE6) (CD | FZD9        | 591         | 94.15              | 197.92          | 91.20        | 592.72        | 31.35                | 99.11           | 71.50        | 437.76          |
| <b>Fz/Tas</b> | <b>SMO SMOH</b> | <b>Smoothened homolog (SMO) (P</b>  | <b>SMO</b>  | <b>787</b>  | <b>81.65</b>       | <b>112.90</b>   | <b>83.95</b> | <b>402.93</b> | <b>85.40</b>         | <b>91.78</b>    | <b>66.70</b> | <b>1,040.40</b> |
| Fz/Tas        | TAS2R10         | Taste receptor type 2 member 10     | T2R10       | 307         | 50.40              | 104.02          | 91.80        | 306.68        | 41.15                | 217.28          | 34.10        | 244.00          |
| Fz/Tas        | TAS2R13         | Taste receptor type 2 member 13     | T2R13       | 303         | 52.00              | 85.37           | 95.25        | 1,087.27      | 17.05                | 33.13           | 65.25        | 46.25           |
| Fz/Tas        | TAS2R14         | Taste receptor type 2 member 14     | T2R14       | 317         | 60.75              | 50.59           | 90.35        | 122.01        | 9.15                 | 41.40           | 25.85        | 27.71           |
| Fz/Tas        | TAS2R16         | Taste receptor type 2 member 16     | T2R16       | 291         | 61.70              | 108.38          | 91.35        | 725.36        | 23.50                | 30.70           | 90.45        | 174.43          |
| Fz/Tas        | TAS2R19 TAS2R   | Taste receptor type 2 member 19     | T2R19       | 299         | 71.00              | 42.39           | 97.70        | 133.28        | 36.35                | 13.48           | 46.90        | 17.73           |
| Fz/Tas        | TAS2R20 TAS2R   | Taste receptor type 2 member 20     | T2R20       | 309         | 73.60              | 31.60           | 96.65        | 135.17        | 34.65                | 13.87           | 58.10        | 19.41           |
| Fz/Tas        | TAS2R30 TAS2R   | Taste receptor type 2 member 30     | T2R30       | 319         | 64.20              | 47.12           | 96.15        | 353.66        | 44.20                | 15.64           | 87.05        | 34.74           |
| Fz/Tas        | TAS2R31 TAS2R   | Taste receptor type 2 member 31     | T2R31       | 309         | 43.35              | 51.05           | 95.15        | 496.84        | 37.95                | 14.16           | 89.25        | 62.85           |
| Fz/Tas        | TAS2R38 PTC     | Taste receptor type 2 member 38     | T2R38       | 333         | 69.90              | 99.14           | 97.70        | 629.86        | 78.90                | 33.41           | 92.40        | 206.90          |
| Fz/Tas        | TAS2R39         | Taste receptor type 2 member 39     | T2R39       | 338         | 3.70               | 80.33           | 18.05        | 19.81         | 61.60                | 29.98           | 93.75        | 343.25          |
| Fz/Tas        | TAS2R40 GPR60   | Taste receptor type 2 member 40     | T2R40       | 323         | 63.00              | 101.83          | 90.00        | 560.34        | 15.05                | 147.85          | 58.25        | 644.40          |
| Fz/Tas        | TAS2R41         | Taste receptor type 2 member 41     | T2R41       | 307         | 60.10              | 80.50           | 96.90        | 188.35        | 42.55                | 20.58           | 59.50        | 26.90           |
| Fz/Tas        | TAS2R42 TAS2R   | Taste receptor type 2 member 42     | T2R42       | 314         | 63.80              | 86.61           | 96.80        | 569.07        | 51.85                | 16.43           | 78.20        | 26.49           |
| Fz/Tas        | TAS2R43         | Taste receptor type 2 member 43     | T2R43       | 309         | 38.35              | 52.22           | 37.90        | 42.80         | 40.85                | 14.17           | 75.70        | 22.05           |
| Fz/Tas        | TAS2R45 GPR59   | Taste receptor type 2 member 45     | T2R45       | 299         | 10.90              | 51.88           | 4.55         | 624.55        | 15.40                | 18.40           | 94.05        | 81.24           |
| Fz/Tas        | TAS2R46         | Taste receptor type 2 member 46     | T2R46       | 309         | 40.00              | 71.00           | 43.85        | 46.69         | 49.30                | 15.42           | 87.60        | 28.00           |
| Fz/Tas        | TAS2R50         | Taste receptor type 2 member 50     | T2R50       | 299         | 65.20              | 46.00           | 96.95        | 210.13        | 39.80                | 14.14           | 37.85        | 17.08           |
| Fz/Tas        | TAS2R60         | Taste receptor type 2 member 60     | T2R60       | 318         | 59.20              | 68.64           | 96.25        | 205.18        | 72.45                | 72.16           | 93.80        | 449.75          |
| Fz/Tas        | TAS2R1          | Taste receptor type 2 member 1      | TA2R1       | 299         | 50.40              | 45.60           | 82.65        | 274.50        | 3.45                 | 25.07           | 54.45        | 32.65           |
| Fz/Tas        | TAS2R3          | Taste receptor type 2 member 3      | TA2R3       | 316         | 53.75              | 30.50           | 77.40        | 198.38        | 26.80                | 24.01           | 86.55        | 124.74          |
| Fz/Tas        | TAS2R4          | Taste receptor type 2 member 4      | TA2R4       | 299         | 47.50              | 74.26           | 87.10        | 233.38        | 4.55                 | 24.82           | 71.50        | 75.59           |
| Fz/Tas        | TAS2R5          | Taste receptor type 2 member 5      | TA2R5       | 299         | 56.35              | 63.77           | 93.90        | 663.58        | 41.10                | 31.03           | 44.00        | 34.18           |
| Fz/Tas        | TAS2R7          | Taste receptor type 2 member 7      | TA2R7       | 318         | 62.65              | 82.32           | 92.50        | 357.14        | 22.40                | 47.87           | 81.65        | 119.18          |
| Fz/Tas        | TAS2R8          | Taste receptor type 2 member 8      | TA2R8       | 309         | 46.75              | 75.26           | 91.05        | 686.28        | 26.15                | 38.57           | 78.35        | 128.97          |
| Fz/Tas        | TAS2R9          | Taste receptor type 2 member 9      | TA2R9       | 312         | 37.55              | 97.49           | 81.60        | 125.20        | 46.75                | 75.26           | 91.05        | 686.28          |
| Adhesion      | BAI1            | Brain-specific angiogenesis inhibi  | BAI1        | 1584        | 45.80              | 180.36          | 94.20        | 697.44        | 10.80                | 50.97           | 9.50         | 35.10           |

Table S1. Comprehensive Protein Expression Data for 826 GPCRs

| Family   | Gene_names     | Protein_names                      | Target name | WT-aa-count | Nt_BRIL constructs |                 |          |               | ICL3_BRIL constructs |                 |          |               |
|----------|----------------|------------------------------------|-------------|-------------|--------------------|-----------------|----------|---------------|----------------------|-----------------|----------|---------------|
|          |                |                                    |             |             | surface(%)         | surface density | total(%) | total density | surface(%)           | surface density | total(%) | total density |
| Adhesion | BAI2           | Brain-specific angiogenesis inhibi | BAI2        | 1585        | 73.60              | 89.17           | 95.60    | 585.33        | 85.35                | 89.03           | 91.45    | 1,043.03      |
| Adhesion | BAI3 KIAA0550  | Brain-specific angiogenesis inhibi | BAI3        | 1522        | 92.10              | 236.86          | 97.25    | 843.05        | 96.05                | 153.58          | 96.55    | 1,296.29      |
| Adhesion | CD97           | CD97 antigen (Leukocyte antigen    | CD97        | 835         | 68.55              | 121.63          | 87.90    | 294.42        | 20.60                | 34.29           | 75.50    | 250.56        |
| Adhesion | CELSR1 CDHF9 F | Cadherin EGF LAG seven-pass G-     | CEL1        | 3014        | 56.20              | 70.94           | 93.30    | 654.57        | 95.15                | 393.58          | 88.45    | 491.09        |
| Adhesion | CELSR2 CDHF10  | Cadherin EGF LAG seven-pass G-     | CEL2        | 2923        | 92.80              | 243.06          | 85.05    | 614.18        | 91.95                | 222.29          | 67.60    | 550.80        |
| Adhesion | CELSR3 CDHF11  | Cadherin EGF LAG seven-pass G-     | CEL3        | 3312        | 94.40              | 163.13          | 92.55    | 812.34        | 3.50                 | 137.70          | 0.50     | 108.65        |
| Adhesion | ELTD1 ETL UNQ  | EGF, latrophilin and seven transn  | ELTD1       | 690         | 53.05              | 51.11           | 90.95    | 194.67        | 62.95                | 35.33           | 92.20    | 303.41        |
| Adhesion | EMR1 TM7LN3    | EGF-like module-containing muc     | EMR1        | 886         | 93.35              | 189.59          | 92.85    | 346.78        | 84.30                | 83.86           | 81.95    | 139.31        |
| Adhesion | EMR2           | EGF-like module-containing muc     | EMR2        | 823         | 62.15              | 124.49          | 93.95    | 635.02        | 9.25                 | 47.28           | 7.20     | 257.96        |
| Adhesion | EMR3 UNQ683/   | EGF-like module-containing muc     | EMR3        | 652         | 84.40              | 108.34          | 93.40    | 474.44        | 44.65                | 47.93           | 63.20    | 105.12        |
| Adhesion | EMR4P EMR4 G   | Putative EGF-like module-contair   | EMR4        | 457         | 61.75              | 168.53          | 89.05    | 164.09        | 18.55                | 27.49           | 11.15    | 21.02         |
| Adhesion | GPR110 PGR19   | Probable G-protein coupled rece    | GP110       | 910         | 65.95              | 96.62           | 93.65    | 558.81        | 38.15                | 45.31           | 90.25    | 803.32        |
| Adhesion | GPR111 PGR20   | Probable G-protein coupled rece    | GP111       | 708         | 25.15              | 148.04          | 36.65    | 71.81         | 22.45                | 28.66           | 83.90    | 170.47        |
| Adhesion | GPR112         | Probable G-protein coupled rece    | GP112       | 3080        | 40.65              | 78.29           | 90.60    | 660.77        | 49.80                | 44.58           | 85.70    | 815.63        |
| Adhesion | GPR113 PGR23   | Probable G-protein coupled rece    | GP113       | 1079        | 51.90              | 113.25          | 91.45    | 729.70        | 43.95                | 31.71           | 93.00    | 245.44        |
| Adhesion | GPR114 PGR27   | Probable G-protein coupled rece    | GP114       | 528         | 87.40              | 68.26           | 97.60    | 476.01        | 39.05                | 21.71           | 86.55    | 114.56        |
| Adhesion | GPR115 PGR18   | Probable G-protein coupled rece    | GP115       | 695         | 48.85              | 48.78           | 91.90    | 353.43        | 36.75                | 16.32           | 90.10    | 117.22        |
| Adhesion | GPR116 KIAA071 | Probable G-protein coupled rece    | GP116       | 1346        | 39.85              | 143.12          | 92.00    | 634.84        | 48.75                | 30.71           | 90.15    | 779.39        |
| Adhesion | GPR123 KIAA18  | Probable G-protein coupled rece    | GP123       | 560         | 90.90              | 83.07           | 96.15    | 579.28        | 90.75                | 64.89           | 94.05    | 832.12        |
| Adhesion | GPR124 KIAA15  | G-protein coupled receptor 124     | GP124       | 1338        | 95.15              | 269.49          | 87.90    | 728.11        | 91.70                | 142.95          | 83.40    | 725.57        |
| Adhesion | GPR125 UNQ55   | Probable G-protein coupled rece    | GP125       | 1321        | 61.15              | 66.26           | 74.30    | 268.21        | 56.30                | 42.38           | 79.00    | 443.85        |
| Adhesion | GPR126 DREG V  | G-protein coupled receptor 126     | GP126       | 1221        | 57.55              | 95.18           | 93.65    | 622.76        | 66.05                | 50.16           | 95.70    | 930.53        |
| Adhesion | GPR128         | Probable G-protein coupled rece    | GP128       | 797         | 50.85              | 30.36           | 86.35    | 214.53        | 56.65                | 36.38           | 94.15    | 953.70        |
| Adhesion | GPR133 PGR25   | Probable G-protein coupled rece    | GP133       | 874         | 52.05              | 97.47           | 92.40    | 671.37        | 24.85                | 37.15           | 90.45    | 219.42        |
| Adhesion | GPR144 PGR24   | Probable G-protein coupled rece    | GP144       | 963         | 5.70               | 49.38           | 2.00     | 36.00         | 28.35                | 25.49           | 86.30    | 94.48         |
| Adhesion | GPR56 TM7LN4   | G-protein coupled receptor 56 (P   | GPR56       | 693         | 32.50              | 99.97           | 33.60    | 50.62         | 40.20                | 18.33           | 92.15    | 128.60        |
| Adhesion | GPR64 HE6 TM7  | G-protein coupled receptor 64 (H   | GPR64       | 1017        | 67.50              | 58.04           | 93.15    | 460.95        | 43.35                | 29.02           | 94.45    | 455.03        |
| Adhesion | GPR97 PGR26    | Probable G-protein coupled rece    | GPR97       | 549         | 49.20              | 66.74           | 85.80    | 137.30        | 78.70                | 22.19           | 94.30    | 103.63        |
| Adhesion | GPR98 KIAA068  | G-protein coupled receptor 98 (N   | GPR98       | 6306        | 95.75              | 180.08          | 88.25    | 511.74        | 84.45                | 136.71          | 82.50    | 490.85        |
| Adhesion | LPHN1 KIAA082  | Latrophilin-1 (Calcium-independ    | LPHN1       | 1474        | 70.80              | 127.23          | 92.30    | 440.39        | 22.65                | 23.70           | 84.70    | 199.08        |
| Adhesion | LPHN2 KIAA078  | Latrophilin-2 (Calcium-independ    | LPHN2       | 1459        | 63.75              | 104.31          | 88.85    | 440.91        | 29.30                | 25.09           | 80.95    | 154.26        |
| Adhesion | LPHN3 KIAA076  | Latrophilin-3 (Calcium-independ    | LPHN3       | 1447        | 87.10              | 87.63           | 91.25    | 293.44        | 56.75                | 56.20           | 84.20    | 157.15        |

Table S2. Loop lengths for receptors with surface percentage >80% (upper) and <30% (lower) for both Nt\_BRIL and ICL3\_BRIL constructs. Structurally determined receptors are shown in blue.

| Surface percentage > 80% |                    | Nt         | ICL1     | ICL2      | ICL3      | ECL1     | ECL2      | ECL3     | Ct         |
|--------------------------|--------------------|------------|----------|-----------|-----------|----------|-----------|----------|------------|
| Rhodopsin                | <b>A2A</b>         | <b>6</b>   | <b>5</b> | <b>10</b> | <b>12</b> | <b>7</b> | <b>38</b> | <b>9</b> | <b>106</b> |
|                          | APJ                | 25         | 7        | 8         | 17        | 8        | 35        | 4        | 68         |
|                          | MARGRE             | 21         | 6        | 10        | 5         | 6        | 12        | 4        | 29         |
|                          | OPSB               | 31         | 6        | 10        | 16        | 9        | 28        | 7        | 32         |
|                          | OPSD               | 34         | 6        | 10        | 16        | 7        | 28        | 7        | 29         |
|                          | OPSG               | 50         | 6        | 11        | 18        | 6        | 28        | 5        | 25         |
|                          | 5HT4R              | 14         | 7        | 10        | 39        | 6        | 30        | 5        | 64         |
|                          | <b>PAR1</b>        | <b>100</b> | <b>6</b> | <b>11</b> | <b>12</b> | <b>6</b> | <b>29</b> | <b>9</b> | <b>38</b>  |
|                          | <b>S1P1</b>        | <b>42</b>  | <b>6</b> | <b>10</b> | <b>24</b> | <b>5</b> | <b>29</b> | <b>6</b> | <b>54</b>  |
| TRFR                     | 22                 | 6          | 11       | 44        | 6         | 21       | 5         | 60       |            |
| Secretin                 | SCTR               | 139        | 7        | 10        | 12        | 14       | 17        | 1        | 49         |
| Glutamate                | CASR               | 602        | 8        | 19        | 2         | 7        | 25        | 2        | 208        |
|                          | GPC5D              | 20         | 12       | 8         | 11        | 4        | 16        | 11       | 78         |
|                          | GP158              | 354        | 10       | 9         | 10        | 5        | 35        | 7        | 543        |
| Frizzled/<br>Taste2      | FZD4               | 212        | 10       | 14        | 8         | 30       | 19        | 13       | 42         |
|                          | <b>SMO</b>         | 252        | 11       | 15        | 10        | 58       | 19        | 39       | 251        |
| Adhesion                 | BAI3               | 843        | 23       | 10        | 70        | 23       | 16        | 15       | 332        |
|                          | CELR2              | 2373       | 7        | 10        | 8         | 4        | 18        | 1        | 311        |
|                          | EMR1               | 498        | 19       | 14        | 39        | 14       | 13        | 8        | 5          |
|                          | GPR98              | 5844       | 5        | 9         | 5         | 9        | 25        | 4        | 152        |
|                          | GPR123             | 10         | 5        | 19        | 46        | 6        | 22        | 4        | 237        |
|                          | GPR124             | 750        | 10       | 18        | 52        | 5        | 13        | /        | 426        |
| Surface percentage <30%  |                    | Nt         | ICL1     | ICL2      | ICL3      | ECL1     | ECL2      | ECL3     | Ct         |
| Rhodopsin                | DR5R               | 35         | 7        | 10        | 33        | 4        | 43        | 16       | 106        |
|                          | MC3R               | 34         | 6        | 17        | 20        | 17       | 8         | 15       | 8          |
|                          | GP132              | 38         | 6        | 10        | 7         | 8        | 15        | 16       | 70         |
|                          | NPY2               | 49         | 9        | 7         | 9         | 6        | 28        | 7        | 37         |
| Secretin                 | GP111              | 413        | 22       | 12        | 38        | 31       | 18        | 2        | /          |
|                          | GP144              | 623        | 22       | 9         | 43        | 20       | 15        | 11       | 23         |
| Glutamate                | mGluR7             | 588        | 10       | 16        | 9         | 7        | 29        | 11       | 65         |
|                          | GABA <sub>B1</sub> | 589        | 10       | 16        | 10        | 12       | 35        | 8        | 97         |
| Frizzled/<br>Taste2      | T2R45              | 1          | 33       | 7         | 30        | 22       | 31        | 9        | 19         |

Table S3. Loop lengths for receptors with surface percentage >80% for the Nt\_BRIL constructs. Structurally determined receptors are shown in blue.

| Surface percentage > 80% for Nt BRIL | Nt     | ICL1 | ICL2 | ICL3 | ECL1 | ECL2 | ECL3 | Ct  |     |
|--------------------------------------|--------|------|------|------|------|------|------|-----|-----|
| Rhodopsin                            | 5HT4R  | 14   | 4    | 9    | 113  | 6    | 21   | 10  | 64  |
|                                      | A2A    | 6    | 5    | 10   | 12   | 7    | 38   | 9   | 106 |
|                                      | APJ    | 25   | 7    | 8    | 17   | 8    | 35   | 4   | 68  |
|                                      | ADA2B  | 8    | 5    | 9    | 6    | 16   | 51   | 6   | 8   |
|                                      | CML1   | 37   | 6    | 8    | 8    | 7    | 39   | /   | 39  |
|                                      | EDNRA  | 76   | 4    | 9    | 12   | 11   | 26   | 11  | 43  |
|                                      | ETNB2  | 97   | 5    | 9    | 11   | 6    | 28   | 11  | 52  |
|                                      | GP101  | 26   | 5    | 9    | 170  | 6    | 20   | 7   | 51  |
|                                      | GPC39  | 26   | 14   | 20   | 41   | 20   | 45   | 18  | 105 |
|                                      | GPR26  | 1    | 6    | 9    | 30   | 6    | 23   | /   | 28  |
|                                      | GPR82  | 10   | 5    | 27   | 10   | 11   | 21   | 9   | 23  |
|                                      | GPR85  | 16   | 6    | 9    | 16   | 7    | 56   | 4   | 12  |
|                                      | LGR4   | 535  | 19   | 8    | 6    | 5    | 23   | 6   | 132 |
|                                      | MRGRD  | 24   | 4    | 8    | 9    | 6    | 6    | ?   | 27  |
|                                      | MARGRE | 21   | 6    | 10   | 5    | 6    | 12   | 4   | 29  |
|                                      | MARGRF | 41   | 4    | 8    | 8    | 8    | 14   | ?   | 34  |
|                                      | OPSB   | 31   | 6    | 10   | 16   | 9    | 28   | 7   | 32  |
|                                      | OPSD   | 34   | 6    | 10   | 16   | 7    | 28   | 7   | 29  |
|                                      | OPSG   | 50   | 6    | 11   | 18   | 6    | 28   | 5   | 25  |
|                                      | PAR1   | 100  | 6    | 11   | 12   | 6    | 29   | 9   | 38  |
| PAR3                                 | 90     | 5    | 9    | 5    | 7    | 26   | 7    | 12  |     |
| RGR                                  | 15     | 16   | 18   | 23   | 18   | 24   | 7    | 23  |     |
| SIP1                                 | 42     | 6    | 10   | 24   | 5    | 29   | 6    | 54  |     |
| TRFR                                 | 22     | 5    | 12   | 36   | 5    | 22   | 6    | 60  |     |
| O10X1                                | 41     | 8    | 19   | 20   | 24   | 37   | 10   | 21  |     |
| O56A4                                | 28     | 8    | 19   | 20   | 24   | 36   | 15   | 16  |     |
| Secretin                             | GLP2R  | 175  | 6    | 9    | 7    | 17   | 9    | 7   | 114 |
|                                      | SCTR   | 139  | 7    | 10   | 12   | 14   | 17   | 1   | 49  |
| Glutamate                            | CASR   | 602  | 8    | 19   | 2    | 7    | 25   | 2   | 208 |
|                                      | GPC5B  | 53   | 12   | 8    | 10   | 5    | 12   | 12  | 104 |
|                                      | GPC5C  | 47   | 12   | 8    | 10   | 7    | 27   | 11  | 134 |
|                                      | GPC5D  | 20   | 12   | 8    | 11   | 4    | 16   | 11  | 76  |
|                                      | GRM2   | 565  | 10   | 14   | 8    | 5    | 23   | 8   | 51  |
|                                      | GRM3   | 574  | 10   | 15   | 8    | 5    | 23   | 8   | 50  |
|                                      | GP158  | 354  | 10   | 9    | 10   | 5    | 35   | 7   | 543 |
|                                      | RAI3   | 33   | 14   | 11   | 15   | 8    | 26   | 14  | 89  |
| TS1R2                                | 563    | 10   | 15   | 8    | 5    | 24   | 6    | 20  |     |
| Frizzled/<br>Taste2                  | FZD1   | 312  | 6    | 7    | 7    | 26   | 19   | 21  | 26  |
|                                      | FZD3   | 195  | 7    | 6    | 7    | 27   | 19   | 14  | 168 |
|                                      | FZD4   | 212  | 10   | 14   | 8    | 30   | 19   | 13  | 42  |
|                                      | FZD5   | 168  | 6    | 8    | 7    | 23   | 19   | 8   | 64  |
|                                      | FZD8   | 270  | 6    | 8    | 9    | 62   | 19   | 8   | 90  |
|                                      | FZD9   | 224  | 6    | 8    | 7    | 25   | 19   | 17  | 63  |
| SMO                                  | 252    | 11   | 15   | 10   | 58   | 19   | 39   | 251 |     |
| Adhesion                             | BAI3   | 843  | 23   | 10   | 70   | 23   | 16   | 15  | 332 |

|               |      |    |    |    |    |    |   |     |
|---------------|------|----|----|----|----|----|---|-----|
| <b>CELR2</b>  | 2373 | 7  | 10 | 8  | 4  | 18 | 1 | 311 |
| <b>CELR3</b>  | 2536 | 7  | 9  | 10 | 5  | 10 | / | 538 |
| <b>EMR1</b>   | 498  | 19 | 14 | 39 | 14 | 13 | 8 | 5   |
| <b>EMR3</b>   | 325  | 17 | 13 | 36 | 17 | 14 | 6 | 18  |
| <b>GPR98</b>  | 5844 | 5  | 9  | 5  | 9  | 25 | 4 | 152 |
| <b>GP114</b>  | 213  | 21 | 10 | 35 | 19 | 27 | 4 | 0   |
| <b>LPHN3</b>  | 861  | 5  | 8  | 6  | 5  | 14 | 4 | 343 |
| <b>GPR123</b> | 10   | 5  | 19 | 46 | 6  | 22 | 4 | 237 |
| <b>GPR124</b> | 750  | 10 | 18 | 52 | 5  | 13 | / | 426 |

---



**Table S4. Loop lengths for receptors with surface percentage >80% for the ICL3\_BRIL constructs. Structurally determined receptors are shown in blue.**

| Surface percentage > 80% for ICL3_BRIL | NT        | ICL1     | ICL2      | ICL3      | ECL1     | ECL2      | ECL3     | CT         |
|----------------------------------------|-----------|----------|-----------|-----------|----------|-----------|----------|------------|
| 5HT1A                                  | 32        | 5        | 9         | 113       | 6        | 21        | 10       | 7          |
| 5HT2C                                  | 53        | 5        | 9         | 60        | 6        | 19        | 7        | 71         |
| 5HT4R                                  | 14        | 7        | 10        | 39        | 6        | 30        | 5        | 64         |
| 5HT6R                                  | 21        | 4        | 9         | 36        | 5        | 21        | 4        | 105        |
| 5HT7R                                  | 77        | 5        | 10        | 51        | 7        | 19        | 12       | 84         |
| <b>A2A</b>                             | <b>6</b>  | <b>5</b> | <b>10</b> | <b>12</b> | <b>7</b> | <b>38</b> | <b>9</b> | <b>106</b> |
| APJ                                    | 25        | 7        | 8         | 17        | 8        | 35        | 4        | 68         |
| ACM1                                   | 21        | 5        | 9         | 140       | 6        | 22        | 5        | 27         |
| ACM5                                   | 26        | 6        | 9         | 212       | 6        | 22        | 6        | 22         |
| ADA1A                                  | 21        | 5        | 9         | 57        | 6        | 17        | 6        | 125        |
| ADRB1                                  | 53        | 5        | 9         | 56        | 6        | 25        | 5        | 86         |
| ADRB3                                  | 32        | 5        | 9         | 44        | 6        | 26        | 6        | 48         |
| AGTR1                                  | 25        | 5        | 8         | 13        | 7        | 25        | 6        | 39         |
| BRS3                                   | 43        | 5        | 9         | 15        | 6        | 26        | 7        | 55         |
| C5AR                                   | 34        | 4        | 13        | 6         | 7        | 21        | 5        | 46         |
| CCR7                                   | 52        | 5        | 10        | 6         | 5        | 19        | 10       | 36         |
| CXCR1                                  | 33        | 7        | 8         | 7         | 5        | 20        | 10       | 29         |
| CXCR2                                  | 45        | 5        | 12        | 7         | 5        | 21        | 8        | 42         |
| DUFFY                                  | 63        | 11       | 13        | 16        | 13       | 20        | 22       | 28         |
| EDNRB                                  | 97        | 5        | 9         | 28        | 6        | 28        | 11       | 52         |
| GALR2                                  | 22        | 5        | 8         | 12        | 7        | 16        | 8        | 79         |
| GP135                                  | 100       | 5        | 8         | 5         | 13       | 25        | 9        | 72         |
| <b>Rhodopsin</b>                       |           |          |           |           |          |           |          |            |
| GP153                                  | 3         | 5        | 9         | 21        | 10       | 55        | 685      | 206        |
| GP162                                  | 9         | 5        | 9         | 58        | 11       | 20        | 6        | 254        |
| GP173                                  | 17        | 5        | 11        | 25        | 8        | 54        | 4        | 17         |
| GPBAR                                  | 11        | 6        | 8         | 21        | 7        | 18        | 11       | 30         |
| GPR83                                  | 67        | 5        | 7         | 14        | 6        | 26        | 1        | 63         |
| GPR87                                  | 39        | 6        | 8         | /         | 5        | 18        | 52       | 40         |
| HRH1                                   | 23        | 4        | 9         | 188       | 6        | 23        | 5        | 3          |
| HRH4                                   | 11        | 5        | 8         | 92        | 5        | 18        | 7        | 16         |
| <b>LPAR1</b>                           | <b>46</b> | <b>7</b> | <b>8</b>  | <b>14</b> | <b>8</b> | <b>19</b> | <b>8</b> | <b>37</b>  |
| MRGRE                                  | 21        | 6        | 10        | 5         | 6        | 12        | 4        | 29         |
| NPY1R                                  | 36        | 6        | 8         | 13        | 6        | 29        | 5        | 48         |
| O5AL1                                  | 44        | 8        | 22        | 12        | 19       | 42        | 13       | 21         |
| OPSB                                   | 31        | 6        | 10        | 16        | 9        | 28        | 7        | 32         |
| OPSD                                   | 34        | 6        | 10        | 16        | 7        | 28        | 7        | 29         |
| OPSG                                   | 50        | 6        | 11        | 18        | 6        | 28        | 5        | 25         |
| OPSR                                   | 49        | 5        | 9         | 15        | 7        | 26        | 7        | 26         |
| PAR1                                   | 100       | 6        | 11        | 12        | 6        | 29        | 9        | 38         |
| P2YR2                                  | 30        | 5        | 8         | 7         | 8        | 20        | 4        | 67         |
| PD2R2                                  | 29        | 4        | 8         | 8         | 7        | 33        | 4        | 73         |
| RL3R1                                  | 78        | 6        | 20        | 27        | 7        | 28        | 6        | 63         |
| <b>S1P1</b>                            | <b>42</b> | <b>6</b> | <b>10</b> | <b>24</b> | <b>5</b> | <b>29</b> | <b>6</b> | <b>54</b>  |
| S1P5                                   | 32        | 5        | 9         | 39        | 9        | /         | 11       | 76         |
| TRFR                                   | 22        | 5        | 12        | 36        | 5        | 22        | 6        | 60         |

|                             |               |            |           |           |           |           |           |           |            |
|-----------------------------|---------------|------------|-----------|-----------|-----------|-----------|-----------|-----------|------------|
|                             | <b>UR2R</b>   | 45         | 5         | 8         | 8         | 6         | 16        | 4         | 59         |
|                             | <b>GHRHR</b>  | 126        | 7         | 9         | 9         | 8         | 9         | 3         | 44         |
| <b>Secretin</b>             | <b>GP157</b>  | 40         | 0         | 10        | 27        | 5         | 5         | 16        | 33         |
|                             | <b>SCTR</b>   | 139        | 7         | 10        | 12        | 14        | 17        | 1         | 49         |
|                             | <b>VIPR1</b>  | 123        | 7         | 9         | 9         | 7         | 8         | 5         | 60         |
|                             | <b>VIPR2</b>  | 139        | 7         | 8         | 9         | 11        | 9         | 4         | 66         |
|                             | <b>CASR</b>   | 602        | 8         | 19        | 2         | 7         | 25        | 2         | 208        |
| <b>Glutamate</b>            | <b>GP158</b>  | 354        | 10        | 9         | 10        | 5         | 35        | 7         | 543        |
|                             | <b>GPC5D</b>  | 20         | 12        | 8         | 11        | 4         | 16        | 11        | 78         |
| <b>Frizzled/<br/>Taste2</b> | <b>FZD4</b>   | 212        | 10        | 14        | 8         | 30        | 19        | 13        | 42         |
|                             | <b>FZD6</b>   | 191        | 6         | 8         | 7         | 27        | 19        | 14        | 212        |
|                             | <b>SMO</b>    | <b>252</b> | <b>11</b> | <b>15</b> | <b>10</b> | <b>58</b> | <b>19</b> | <b>39</b> | <b>251</b> |
| <b>Adhesion</b>             | <b>BAI2</b>   | 898        | 21        | 8         | 68        | 18        | 15        | 14        | 340        |
|                             | <b>BAI3</b>   | 843        | 23        | 10        | 70        | 23        | 16        | 15        | 332        |
|                             | <b>CELR1</b>  | 2465       | 5         | 8         | 9         | 5         | 14        | /         | 310        |
|                             | <b>CELR2</b>  | 2373       | 7         | 10        | 8         | 4         | 18        | 1         | 311        |
|                             | <b>EMR1</b>   | 498        | 19        | 14        | 39        | 14        | 13        | 8         | 5          |
|                             | <b>GPR98</b>  | 5844       | 5         | 9         | 5         | 9         | 25        | 4         | 152        |
|                             | <b>GPR123</b> | 10         | 5         | 19        | 46        | 6         | 22        | 4         | 237        |
|                             | <b>GPR124</b> | 750        | 10        | 18        | 52        | 5         | 13        | /         | 426        |

1 10 20 30 40 50 60  
 ADRB1 MGAGVLVLGASEP GNISSAAPLPDGAATAARLLVPASPPASLLPPASESPEPLSQQTATAG  
 ADRB3 .....MAPWPHENSSSLAPWPD.....LPTLAPNTANTSLGLPGVP.....WEAAA  
 ADRB2 .....MGQP GNGSAFLLAPN.....GSHAPDHDVTDQER.....DEVVVVG

70 80 90 100 110  
 ADRB1 MG.LLMA.LIVLLI.VACNV.LVI.VAIA.KTP.RLQ.TITN.LFIM.SLAS.ADLVMGL.IVVP.FCA.TIV  
 ADRB3 LAGALLA.LAVLAT.VGCV.LVI.VAIA.WT.RLQ.TITN.VFV.TSLA.ADLVMGL.IVVP.PAATLA  
 ADRB2 MG.IVMS.LIVLA.IVFCNV.LVI.TAIA.KFB.RLQ.TITN.YF.LTSLA.CADLVMGL.IVVP.FCA.AHI

120 130 140 150 160 170  
 ADRB1 VWGRWEYCSFF.CELWTS.DVLCVTASIE.TLCV.IALDRY.LA.TSP.FRYQS.LLTRARAR.GLV  
 ADRB3 LIGHWPLGATG.CELWTS.DVLCVTASIE.TLCALAVDRY.LAVTNP.LRYGALVTKRCAR.TAV  
 ADRB2 LMKMWTFGNFW.CEFWTS.DVLCVTASIE.TLCV.IAVDRY.FA.TSP.FKYQS.LLTKNKAR.VII

180 190 200 210 220 230  
 ADRB1 CTVVAISALV.SFLPI.LMH.WWRA.ESD.EARR.CYNDPK.CCDF.VITN.RAYAIASS.VVSFYVPLC  
 ADRB3 VIVVVSAAV.SFAPIMSQ.WWRV.GADA.EAQR.CHSNPR.CCAF.SMMP.YVLLSS.VSFYIPLL  
 ADRB2 LMVVI.VSGLT.SFLPI.QMH.WYRA.THQ.EAINC.YANET.CCDF.FINQAYAIASS.IVSFYVPLV

240 250 260 270 280 290  
 ADRB1 IMAFVYLRVFRE.AQRQV.KKID.SCER.RFLGGPARPPSPSPSPVPAPAPPPGPPRFAAAAAAT  
 ADRB3 VMVAVYARVFVVA.TRQLRL.LRGELGRFPP.EESPPAPSRSLAPAPVGTCAPEGVPCAG.  
 ADRB2 IMVAVYLRVFQEAQRQLQKIDKSEGRFHVQNLSQVEQ.....DQRTGHG.

300 310 320 330 340 350  
 ADRB1 APLANGRAGKR.RPSRLVA.LREQ.KALK.TLGLIMGV.FTLCWL.PFFLANVVKAFHR.EIVPDR  
 ADRB3 .....RPARLLP.LREH.KALC.TLGLIMGV.FTLCWL.PFFLANVLRALGGPSLVVPGP  
 ADRB2 .....LRSSKFC.LKEH.KALK.TLGLIMGV.FTLCWL.PFFLVNIVHV.IQD.NLIRKE

360 370 380 390 400 410  
 ADRB1 LFFVFNW.LGYANS.AFNPI.IYCRSPDFR.KAFQR.LLC.CARRAARRRHATHGDRPRASGCLA  
 ADRB3 APLALNW.LGYANS.AFNPI.IYCRSPDFR.SAFRR.LLC.RCGR.....LPPEPCAAA  
 ADRB2 VYILLNW.LGYVNS.CFNPI.IYCRSPDFR.IAFQELLC..IRR.....SSLKA

420 430 440 450 460 470  
 ADRB1 RFGPPPS.PGAASDDDDDDVVGATPPAR.TLEPWA.CNNGGA.AADSDDSSLDPCRPGFASESK  
 ADRB3 RPALFPP.SGVPAARS.....SPAQPR.TCORLD.GASWGV.S.....  
 ADRB2 YCNGYS.SNGNTGEQSGYHVEQEKENKLI.CEDLP.GTEDFV.GHQGTVPSDNIDSQGRNCSTN

ADRB1 V...  
 ADRB3 .....  
 ADRB2 DSSL

**Figure S1 Sequence alignment between adrenergic receptor subfamily**

Boxes with white mark represent the high conserved domain and dots represent the gap between two residues.
